# Supplementary material for: Single-cell RNA-sequencing identifies various proportions of excitatory and inhibitory neurons in cultured human fetal brain cortical tissues
Source: Front Neurosci. 2023 Jun 28;17:1177747. doi: 10.3389/fnins.2023.1177747 (PMC10338112; doi:10.3389/fnins.2023.1177747)
Supplement: Supplementary file 1 [file Data_Sheet_1.docx]

Single-cell RNA-sequencing identifies various proportions of excitatory and inhibitory neurons in cultured human fetal brain cortical tissues

Rong Liu1, Wei Dong1, Dan Xiong1, Zhonghui Tang 1, Lanqi Hu1, Haoran Zhang1, Xiaoping Yuan2, Fang Fu2*, Xin Yang2*, Xia Wu 1*.

1 Zhongshan School of Medicine, Sun Yat-sen University, Guangzhou, Guangdong, China

2 Department of Prenatal Diagnostic Center, Guangzhou Women and Children’s Medical Center, Guangzhou Medical University, Guangzhou, Guangdong, China

* **Correspondence:**

Fang Fu: fuyingyi2008@163.com

Xin Yang: yangsunrise@163.com

Xia Wu: wuxia23@mail.sysu.edu.cn

**Supplementary Figures**


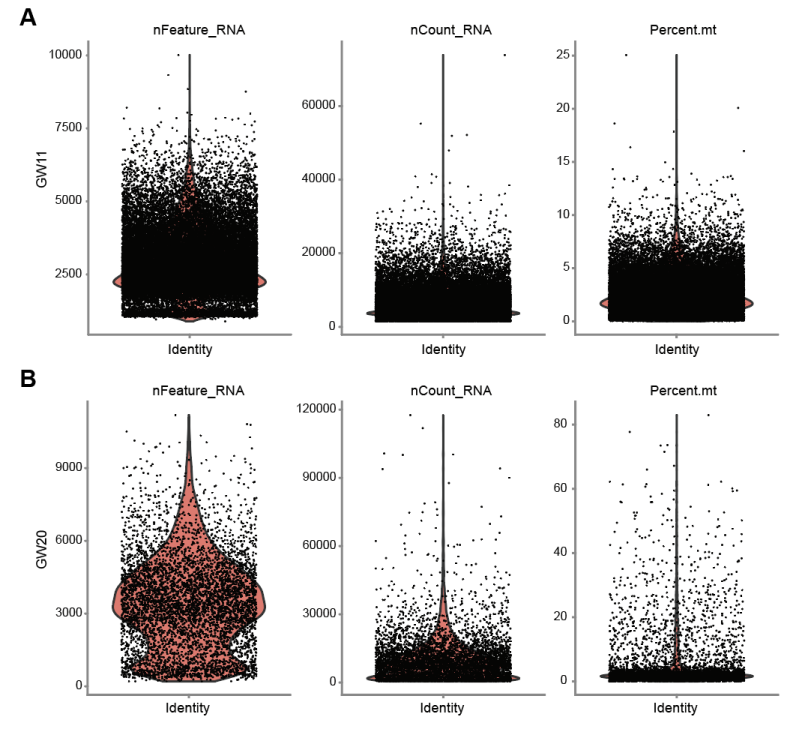


**Supplementary Figure 1.**

Violin plots showing the key quality control parameters for the GW11 (**A**) and GW20 (**B**) datasets. The nFeature_RNA and nCount_RNA represent the numbers of genes and read counts detected per cell, respectively, while the Percent.mt represents the percentage of read counts from mitochondrial genes.
