# Supplementary material for: Single-cell RNA-sequencing identifies various proportions of excitatory and inhibitory neurons in cultured human fetal brain cortical tissues
Source: Front Neurosci. 2023 Jun 28;17:1177747. doi: 10.3389/fnins.2023.1177747 (PMC10338112; doi:10.3389/fnins.2023.1177747)
Supplement: Supplementary file 2 [file Table_1.xls]

## Sheet: All_sample_meta_data
﻿﻿Supplementary Table 1-Statistics for the raw scRNA-seq data
barcode	nCount_RNA	nFeature_RNA	sample	condition	tissue_source	week	scRNA_Kit	project	percent.mt	seurat_clusters	RNA_snn_res.0.7	cellType
GA20W_d20_AAACCTGAGCAGCCTC-1	14249	5047	GA20W_d20	d20	Cortex	Week_20	scRNA_5end_R2_only	Human_Neuron	1.72644	5	5	IN_Precursor
GA20W_d20_AAACCTGAGCTATGCT-1	10937	4251	GA20W_d20	d20	Cortex	Week_20	scRNA_5end_R2_only	Human_Neuron	0.528479	5	5	IN_Precursor
GA20W_d20_AAACCTGAGGGCTTGA-1	3399	2231	GA20W_d20	d20	Cortex	Week_20	scRNA_5end_R2_only	Human_Neuron	17.0779	12	12	EN
GA20W_d20_AAACCTGAGTGGGATC-1	14799	4644	GA20W_d20	d20	Cortex	Week_20	scRNA_5end_R2_only	Human_Neuron	3.65275	8	8	IN_Precursor
GA20W_d20_AAACCTGAGTGTACCT-1	10407	3672	GA20W_d20	d20	Cortex	Week_20	scRNA_5end_R2_only	Human_Neuron	1.54807	8	8	IN_Precursor
GA20W_d20_AAACCTGCACATTCGA-1	5809	2705	GA20W_d20	d20	Cortex	Week_20	scRNA_5end_R2_only	Human_Neuron	3.47657	2	2	IN
GA20W_d20_AAACCTGCACCACCAG-1	11444	4242	GA20W_d20	d20	Cortex	Week_20	scRNA_5end_R2_only	Human_Neuron	1.11754	5	5	IN_Precursor
GA20W_d20_AAACCTGCACCAGGTC-1	3857	2193	GA20W_d20	d20	Cortex	Week_20	scRNA_5end_R2_only	Human_Neuron	0.479501	2	2	IN
GA20W_d20_AAACCTGCACCATCCT-1	8479	3538	GA20W_d20	d20	Cortex	Week_20	scRNA_5end_R2_only	Human_Neuron	2.45098	10	10	IN
GA20W_d20_AAACCTGCACCGTTGG-1	21646	5701	GA20W_d20	d20	Cortex	Week_20	scRNA_5end_R2_only	Human_Neuron	1.25493	8	8	IN_Precursor
GA20W_d20_AAACCTGCACGAAGCA-1	8526	3787	GA20W_d20	d20	Cortex	Week_20	scRNA_5end_R2_only	Human_Neuron	0.806192	0	0	EN
GA20W_d20_AAACCTGCAGGGTACA-1	27969	6891	GA20W_d20	d20	Cortex	Week_20	scRNA_5end_R2_only	Human_Neuron	1.84678	8	8	IN_Precursor
GA20W_d20_AAACCTGGTAAGTAGT-1	6260	2882	GA20W_d20	d20	Cortex	Week_20	scRNA_5end_R2_only	Human_Neuron	3.02778	2	2	IN
GA20W_d20_AAACCTGGTCTTGATG-1	1304	966	GA20W_d20	d20	Cortex	Week_20	scRNA_5end_R2_only	Human_Neuron	14.23	15	15	Astro
GA20W_d20_AAACCTGGTTATGTGC-1	3950	2301	GA20W_d20	d20	Cortex	Week_20	scRNA_5end_R2_only	Human_Neuron	0.741599	4	4	IN
GA20W_d20_AAACGGGCACCGAATT-1	2680	1725	GA20W_d20	d20	Cortex	Week_20	scRNA_5end_R2_only	Human_Neuron	0.643777	2	2	IN
GA20W_d20_AAACGGGCAGTATGCT-1	4149	2379	GA20W_d20	d20	Cortex	Week_20	scRNA_5end_R2_only	Human_Neuron	1.22404	2	2	IN
GA20W_d20_AAACGGGCAGTTCATG-1	5391	2916	GA20W_d20	d20	Cortex	Week_20	scRNA_5end_R2_only	Human_Neuron	6.2694	4	4	IN
GA20W_d20_AAACGGGCATACGCTA-1	9118	3775	GA20W_d20	d20	Cortex	Week_20	scRNA_5end_R2_only	Human_Neuron	1.21124	2	2	IN
GA20W_d20_AAACGGGCATCGGGTC-1	3000	1797	GA20W_d20	d20	Cortex	Week_20	scRNA_5end_R2_only	Human_Neuron	18.194	14	14	Astro
GA20W_d20_AAACGGGTCTGTGCAA-1	8657	3948	GA20W_d20	d20	Cortex	Week_20	scRNA_5end_R2_only	Human_Neuron	2.37171	18	18	EN
GA20W_d20_AAAGATGAGAGTGAGA-1	1763	1314	GA20W_d20	d20	Cortex	Week_20	scRNA_5end_R2_only	Human_Neuron	14.1414	12	12	EN
GA20W_d20_AAAGATGAGCGAAGGG-1	2138	1440	GA20W_d20	d20	Cortex	Week_20	scRNA_5end_R2_only	Human_Neuron	0.0902527	2	2	IN
GA20W_d20_AAAGATGAGGCTACGA-1	9037	3585	GA20W_d20	d20	Cortex	Week_20	scRNA_5end_R2_only	Human_Neuron	1.5415	10	10	IN
GA20W_d20_AAAGATGCAGAGTGTG-1	15582	4924	GA20W_d20	d20	Cortex	Week_20	scRNA_5end_R2_only	Human_Neuron	0.965374	5	5	IN_Precursor
GA20W_d20_AAAGATGCAGTTTACG-1	4926	2737	GA20W_d20	d20	Cortex	Week_20	scRNA_5end_R2_only	Human_Neuron	3.01699	0	0	EN
GA20W_d20_AAAGATGCATTGGGCC-1	5437	2676	GA20W_d20	d20	Cortex	Week_20	scRNA_5end_R2_only	Human_Neuron	3.74283	2	2	IN
GA20W_d20_AAAGATGGTATATGGA-1	5458	2592	GA20W_d20	d20	Cortex	Week_20	scRNA_5end_R2_only	Human_Neuron	2.52127	2	2	IN
GA20W_d20_AAAGATGTCAGATAAG-1	20444	6222	GA20W_d20	d20	Cortex	Week_20	scRNA_5end_R2_only	Human_Neuron	1.81741	7	7	ASCL1+ IPC
GA20W_d20_AAAGCAAAGCCGCCTA-1	27525	6669	GA20W_d20	d20	Cortex	Week_20	scRNA_5end_R2_only	Human_Neuron	1.21987	4	4	IN
GA20W_d20_AAAGCAAGTAGCTGCC-1	8902	3847	GA20W_d20	d20	Cortex	Week_20	scRNA_5end_R2_only	Human_Neuron	0.278667	0	0	EN
GA20W_d20_AAAGCAAGTATTAGCC-1	9084	3866	GA20W_d20	d20	Cortex	Week_20	scRNA_5end_R2_only	Human_Neuron	2.17252	9	9	RG
GA20W_d20_AAAGCAAGTCTAGGTT-1	11445	3957	GA20W_d20	d20	Cortex	Week_20	scRNA_5end_R2_only	Human_Neuron	2.2772	8	8	IN_Precursor
GA20W_d20_AAAGCAATCAATACCG-1	3664	2197	GA20W_d20	d20	Cortex	Week_20	scRNA_5end_R2_only	Human_Neuron	3.77729	4	4	IN
GA20W_d20_AAAGTAGAGACTGGGT-1	3935	2328	GA20W_d20	d20	Cortex	Week_20	scRNA_5end_R2_only	Human_Neuron	6.87795	14	14	Astro
GA20W_d20_AAAGTAGAGCTGCCCA-1	4379	2337	GA20W_d20	d20	Cortex	Week_20	scRNA_5end_R2_only	Human_Neuron	0.276596	2	2	IN
GA20W_d20_AAAGTAGAGGACAGCT-1	2550	1615	GA20W_d20	d20	Cortex	Week_20	scRNA_5end_R2_only	Human_Neuron	5.61989	5	5	IN_Precursor
GA20W_d20_AAAGTAGAGTATTGGA-1	2234	1535	GA20W_d20	d20	Cortex	Week_20	scRNA_5end_R2_only	Human_Neuron	0.664728	4	4	IN
GA20W_d20_AAAGTAGCACATCCAA-1	9365	4212	GA20W_d20	d20	Cortex	Week_20	scRNA_5end_R2_only	Human_Neuron	2.17759	17	17	IN
GA20W_d20_AAAGTAGGTACTTGAC-1	6054	2772	GA20W_d20	d20	Cortex	Week_20	scRNA_5end_R2_only	Human_Neuron	1.29641	2	2	IN
GA20W_d20_AAAGTAGGTTCTGTTT-1	10578	4143	GA20W_d20	d20	Cortex	Week_20	scRNA_5end_R2_only	Human_Neuron	1.45713	5	5	IN_Precursor
GA20W_d20_AAAGTAGTCCACTGGG-1	6639	3010	GA20W_d20	d20	Cortex	Week_20	scRNA_5end_R2_only	Human_Neuron	2.27422	2	2	IN
GA20W_d20_AAAGTAGTCCTTTCGG-1	9711	3875	GA20W_d20	d20	Cortex	Week_20	scRNA_5end_R2_only	Human_Neuron	0.659643	2	2	IN
GA20W_d20_AAAGTAGTCGCCAAAT-1	480	401	GA20W_d20	d20	Cortex	Week_20	scRNA_5end_R2_only	Human_Neuron	12.8975	6	6	IN
GA20W_d20_AAATGCCAGAAGGGTA-1	20550	5892	GA20W_d20	d20	Cortex	Week_20	scRNA_5end_R2_only	Human_Neuron	1.5975	9	9	RG
GA20W_d20_AAATGCCAGAATCTCC-1	8343	3454	GA20W_d20	d20	Cortex	Week_20	scRNA_5end_R2_only	Human_Neuron	0.485539	5	5	IN_Precursor
GA20W_d20_AAATGCCAGTCCTCCT-1	28023	7133	GA20W_d20	d20	Cortex	Week_20	scRNA_5end_R2_only	Human_Neuron	1.05119	11	11	EN
GA20W_d20_AAATGCCCAATGAATG-1	4011	2220	GA20W_d20	d20	Cortex	Week_20	scRNA_5end_R2_only	Human_Neuron	0.347947	2	2	IN
GA20W_d20_AAATGCCCAATGTAAG-1	7211	3444	GA20W_d20	d20	Cortex	Week_20	scRNA_5end_R2_only	Human_Neuron	0.944128	1	1	EN
GA20W_d20_AAATGCCCACACATGT-1	12171	4596	GA20W_d20	d20	Cortex	Week_20	scRNA_5end_R2_only	Human_Neuron	4.40988	8	8	IN_Precursor
GA20W_d20_AAATGCCCAGCCTTGG-1	951	656	GA20W_d20	d20	Cortex	Week_20	scRNA_5end_R2_only	Human_Neuron	0	15	15	Astro
GA20W_d20_AAATGCCCAGGAATCG-1	10520	3804	GA20W_d20	d20	Cortex	Week_20	scRNA_5end_R2_only	Human_Neuron	1.20441	5	5	IN_Precursor
GA20W_d20_AAATGCCGTCCGTCAG-1	9651	3822	GA20W_d20	d20	Cortex	Week_20	scRNA_5end_R2_only	Human_Neuron	2.46611	5	5	IN_Precursor
GA20W_d20_AAATGCCGTCGGCTCA-1	2745	1657	GA20W_d20	d20	Cortex	Week_20	scRNA_5end_R2_only	Human_Neuron	0.138074	2	2	IN
GA20W_d20_AAATGCCGTTTAGCTG-1	22653	6264	GA20W_d20	d20	Cortex	Week_20	scRNA_5end_R2_only	Human_Neuron	3.72659	9	9	RG
GA20W_d20_AAATGCCTCTAACCGA-1	1875	1361	GA20W_d20	d20	Cortex	Week_20	scRNA_5end_R2_only	Human_Neuron	8.3293	12	12	EN
GA20W_d20_AACACGTAGACGCAAC-1	5920	2650	GA20W_d20	d20	Cortex	Week_20	scRNA_5end_R2_only	Human_Neuron	2.91751	10	10	IN
GA20W_d20_AACACGTAGGAATGGA-1	25325	6792	GA20W_d20	d20	Cortex	Week_20	scRNA_5end_R2_only	Human_Neuron	3.78982	9	9	RG
GA20W_d20_AACACGTAGGAGTTGC-1	24179	6425	GA20W_d20	d20	Cortex	Week_20	scRNA_5end_R2_only	Human_Neuron	1.48424	7	7	ASCL1+ IPC
GA20W_d20_AACACGTAGTAGGCCA-1	5336	2679	GA20W_d20	d20	Cortex	Week_20	scRNA_5end_R2_only	Human_Neuron	2.20146	2	2	IN
GA20W_d20_AACACGTCAATTCCTT-1	7323	3505	GA20W_d20	d20	Cortex	Week_20	scRNA_5end_R2_only	Human_Neuron	3.13334	3	3	EOMES+ IPC
GA20W_d20_AACACGTGTCTCTTTA-1	4509	2443	GA20W_d20	d20	Cortex	Week_20	scRNA_5end_R2_only	Human_Neuron	1.59403	2	2	IN
GA20W_d20_AACACGTGTTCCCGAG-1	6399	2810	GA20W_d20	d20	Cortex	Week_20	scRNA_5end_R2_only	Human_Neuron	0.446429	0	0	EN
GA20W_d20_AACACGTTCAGTCCCT-1	16417	4593	GA20W_d20	d20	Cortex	Week_20	scRNA_5end_R2_only	Human_Neuron	1.92318	8	8	IN_Precursor
GA20W_d20_AACACGTTCCAACCAA-1	1144	768	GA20W_d20	d20	Cortex	Week_20	scRNA_5end_R2_only	Human_Neuron	0	16	16	RG
GA20W_d20_AACACGTTCCTCCTAG-1	1838	1317	GA20W_d20	d20	Cortex	Week_20	scRNA_5end_R2_only	Human_Neuron	2.43145	4	4	IN
GA20W_d20_AACACGTTCGCGGATC-1	7943	3173	GA20W_d20	d20	Cortex	Week_20	scRNA_5end_R2_only	Human_Neuron	2.97758	7	7	ASCL1+ IPC
GA20W_d20_AACACGTTCTGGCGTG-1	5804	2996	GA20W_d20	d20	Cortex	Week_20	scRNA_5end_R2_only	Human_Neuron	7.45965	8	8	IN_Precursor
GA20W_d20_AACCATGAGACGCAAC-1	21324	6513	GA20W_d20	d20	Cortex	Week_20	scRNA_5end_R2_only	Human_Neuron	1.0546	18	18	EN
GA20W_d20_AACCATGAGACTAAGT-1	8133	4062	GA20W_d20	d20	Cortex	Week_20	scRNA_5end_R2_only	Human_Neuron	13.4958	14	14	Astro
GA20W_d20_AACCATGAGCGTAATA-1	6436	2911	GA20W_d20	d20	Cortex	Week_20	scRNA_5end_R2_only	Human_Neuron	0.634921	2	2	IN
GA20W_d20_AACCATGAGGCCCTCA-1	10468	4169	GA20W_d20	d20	Cortex	Week_20	scRNA_5end_R2_only	Human_Neuron	2.06177	4	4	IN
GA20W_d20_AACCATGAGTCGTTTG-1	8485	3449	GA20W_d20	d20	Cortex	Week_20	scRNA_5end_R2_only	Human_Neuron	1.92809	5	5	IN_Precursor
GA20W_d20_AACCATGCAACAACCT-1	7644	3663	GA20W_d20	d20	Cortex	Week_20	scRNA_5end_R2_only	Human_Neuron	0.771735	1	1	EN
GA20W_d20_AACCATGCACACATGT-1	16807	5096	GA20W_d20	d20	Cortex	Week_20	scRNA_5end_R2_only	Human_Neuron	1.64406	5	5	IN_Precursor
GA20W_d20_AACCATGCACGCCAGT-1	6508	3061	GA20W_d20	d20	Cortex	Week_20	scRNA_5end_R2_only	Human_Neuron	1.85056	1	1	EN
GA20W_d20_AACCATGCAGGGTTAG-1	10837	4264	GA20W_d20	d20	Cortex	Week_20	scRNA_5end_R2_only	Human_Neuron	1.45204	2	2	IN
GA20W_d20_AACCATGCATTGCGGC-1	7500	3366	GA20W_d20	d20	Cortex	Week_20	scRNA_5end_R2_only	Human_Neuron	2.35611	4	4	IN
GA20W_d20_AACCATGGTACTCGCG-1	17175	4997	GA20W_d20	d20	Cortex	Week_20	scRNA_5end_R2_only	Human_Neuron	1.61241	7	7	ASCL1+ IPC
GA20W_d20_AACCATGGTCACTGGC-1	11421	4634	GA20W_d20	d20	Cortex	Week_20	scRNA_5end_R2_only	Human_Neuron	0.26292	0	0	EN
GA20W_d20_AACCATGGTTCATGGT-1	1006	740	GA20W_d20	d20	Cortex	Week_20	scRNA_5end_R2_only	Human_Neuron	18.6752	6	6	IN
GA20W_d20_AACCATGTCATTTGGG-1	3723	2194	GA20W_d20	d20	Cortex	Week_20	scRNA_5end_R2_only	Human_Neuron	0.12655	1	1	EN
GA20W_d20_AACCATGTCCGCTGTT-1	12218	4624	GA20W_d20	d20	Cortex	Week_20	scRNA_5end_R2_only	Human_Neuron	2.67272	5	5	IN_Precursor
GA20W_d20_AACCATGTCGTGGACC-1	2517	1687	GA20W_d20	d20	Cortex	Week_20	scRNA_5end_R2_only	Human_Neuron	1.61352	2	2	IN
GA20W_d20_AACCGCGAGGCTAGAC-1	700	510	GA20W_d20	d20	Cortex	Week_20	scRNA_5end_R2_only	Human_Neuron	2.08333	6	6	IN
GA20W_d20_AACCGCGCAGACAAAT-1	13086	4783	GA20W_d20	d20	Cortex	Week_20	scRNA_5end_R2_only	Human_Neuron	4.26668	13	13	Oligo
GA20W_d20_AACCGCGCATAGACTC-1	8842	3448	GA20W_d20	d20	Cortex	Week_20	scRNA_5end_R2_only	Human_Neuron	2.57298	5	5	IN_Precursor
GA20W_d20_AACCGCGGTCTAGCCG-1	9984	4045	GA20W_d20	d20	Cortex	Week_20	scRNA_5end_R2_only	Human_Neuron	2.32673	13	13	Oligo
GA20W_d20_AACCGCGTCAAACGGG-1	1239	872	GA20W_d20	d20	Cortex	Week_20	scRNA_5end_R2_only	Human_Neuron	0.474684	6	6	IN
GA20W_d20_AACCGCGTCAAAGTAG-1	494	420	GA20W_d20	d20	Cortex	Week_20	scRNA_5end_R2_only	Human_Neuron	15.6463	17	17	IN
GA20W_d20_AACCGCGTCAACTCTT-1	5380	2962	GA20W_d20	d20	Cortex	Week_20	scRNA_5end_R2_only	Human_Neuron	1.23601	4	4	IN
GA20W_d20_AACCGCGTCAATCACG-1	9885	4053	GA20W_d20	d20	Cortex	Week_20	scRNA_5end_R2_only	Human_Neuron	2.504	5	5	IN_Precursor
GA20W_d20_AACGTTGAGCTACCGC-1	7628	3294	GA20W_d20	d20	Cortex	Week_20	scRNA_5end_R2_only	Human_Neuron	2.1333	10	10	IN
GA20W_d20_AACGTTGAGCTTATCG-1	5732	2734	GA20W_d20	d20	Cortex	Week_20	scRNA_5end_R2_only	Human_Neuron	2.51536	2	2	IN
GA20W_d20_AACGTTGCAACTGCTA-1	5399	2730	GA20W_d20	d20	Cortex	Week_20	scRNA_5end_R2_only	Human_Neuron	2.41737	10	10	IN
GA20W_d20_AACGTTGCACCTCGTT-1	19241	5873	GA20W_d20	d20	Cortex	Week_20	scRNA_5end_R2_only	Human_Neuron	1.16193	13	13	Oligo
GA20W_d20_AACGTTGCACTGTGTA-1	6612	3319	GA20W_d20	d20	Cortex	Week_20	scRNA_5end_R2_only	Human_Neuron	2.51305	4	4	IN
GA20W_d20_AACGTTGCATGCTAGT-1	4166	2375	GA20W_d20	d20	Cortex	Week_20	scRNA_5end_R2_only	Human_Neuron	0.518836	1	1	EN
GA20W_d20_AACGTTGCATGGGAAC-1	6780	3204	GA20W_d20	d20	Cortex	Week_20	scRNA_5end_R2_only	Human_Neuron	1.94865	4	4	IN
GA20W_d20_AACGTTGGTATCACCA-1	6379	3224	GA20W_d20	d20	Cortex	Week_20	scRNA_5end_R2_only	Human_Neuron	4.34076	0	0	EN
GA20W_d20_AACGTTGGTATTCGTG-1	13029	4808	GA20W_d20	d20	Cortex	Week_20	scRNA_5end_R2_only	Human_Neuron	2.27502	2	2	IN
GA20W_d20_AACGTTGTCATAACCG-1	3944	2271	GA20W_d20	d20	Cortex	Week_20	scRNA_5end_R2_only	Human_Neuron	0.394249	4	4	IN
GA20W_d20_AACGTTGTCCAAGCCG-1	17195	5175	GA20W_d20	d20	Cortex	Week_20	scRNA_5end_R2_only	Human_Neuron	1.32075	9	9	RG
GA20W_d20_AACGTTGTCGCAAGCC-1	3206	1935	GA20W_d20	d20	Cortex	Week_20	scRNA_5end_R2_only	Human_Neuron	0.290023	2	2	IN
GA20W_d20_AACTCAGAGAAGATTC-1	12794	4507	GA20W_d20	d20	Cortex	Week_20	scRNA_5end_R2_only	Human_Neuron	2.36341	5	5	IN_Precursor
GA20W_d20_AACTCAGAGCAGGTCA-1	3412	2079	GA20W_d20	d20	Cortex	Week_20	scRNA_5end_R2_only	Human_Neuron	0.798297	4	4	IN
GA20W_d20_AACTCAGAGTGACTCT-1	10912	4104	GA20W_d20	d20	Cortex	Week_20	scRNA_5end_R2_only	Human_Neuron	1.80894	5	5	IN_Precursor
GA20W_d20_AACTCAGCAAACTGTC-1	8555	3928	GA20W_d20	d20	Cortex	Week_20	scRNA_5end_R2_only	Human_Neuron	1.59603	17	17	IN
GA20W_d20_AACTCAGCAAGCCCAC-1	8514	3505	GA20W_d20	d20	Cortex	Week_20	scRNA_5end_R2_only	Human_Neuron	1.75008	7	7	ASCL1+ IPC
GA20W_d20_AACTCAGCAGGATTGG-1	8660	3710	GA20W_d20	d20	Cortex	Week_20	scRNA_5end_R2_only	Human_Neuron	1.74341	4	4	IN
GA20W_d20_AACTCAGCAGTCTTCC-1	25013	6757	GA20W_d20	d20	Cortex	Week_20	scRNA_5end_R2_only	Human_Neuron	1.88485	8	8	IN_Precursor
GA20W_d20_AACTCAGGTGCGCTTG-1	4714	2410	GA20W_d20	d20	Cortex	Week_20	scRNA_5end_R2_only	Human_Neuron	3.53297	5	5	IN_Precursor
GA20W_d20_AACTCAGTCAAACCAC-1	15238	5403	GA20W_d20	d20	Cortex	Week_20	scRNA_5end_R2_only	Human_Neuron	0.45679	11	11	EN
GA20W_d20_AACTCAGTCATGCATG-1	7166	3339	GA20W_d20	d20	Cortex	Week_20	scRNA_5end_R2_only	Human_Neuron	0.991988	2	2	IN
GA20W_d20_AACTCAGTCATGTCCC-1	9831	3798	GA20W_d20	d20	Cortex	Week_20	scRNA_5end_R2_only	Human_Neuron	2.24412	5	5	IN_Precursor
GA20W_d20_AACTCCCAGATGCCAG-1	31411	7057	GA20W_d20	d20	Cortex	Week_20	scRNA_5end_R2_only	Human_Neuron	1.2758	11	11	EN
GA20W_d20_AACTCCCAGGACATTA-1	1956	1488	GA20W_d20	d20	Cortex	Week_20	scRNA_5end_R2_only	Human_Neuron	16.3551	12	12	EN
GA20W_d20_AACTCCCAGGATGGAA-1	5829	2964	GA20W_d20	d20	Cortex	Week_20	scRNA_5end_R2_only	Human_Neuron	1.28728	1	1	EN
GA20W_d20_AACTCCCAGGTTACCT-1	22435	6329	GA20W_d20	d20	Cortex	Week_20	scRNA_5end_R2_only	Human_Neuron	1.17914	4	4	IN
GA20W_d20_AACTCCCAGTCATCCA-1	5800	3047	GA20W_d20	d20	Cortex	Week_20	scRNA_5end_R2_only	Human_Neuron	1.171	4	4	IN
GA20W_d20_AACTCCCCACACATGT-1	5506	3025	GA20W_d20	d20	Cortex	Week_20	scRNA_5end_R2_only	Human_Neuron	0.139349	0	0	EN
GA20W_d20_AACTCCCCATTAGGCT-1	5688	2758	GA20W_d20	d20	Cortex	Week_20	scRNA_5end_R2_only	Human_Neuron	5.58238	9	9	RG
GA20W_d20_AACTCCCGTTCACCTC-1	12534	4734	GA20W_d20	d20	Cortex	Week_20	scRNA_5end_R2_only	Human_Neuron	2.22111	5	5	IN_Precursor
GA20W_d20_AACTCCCTCCAAATGC-1	12144	4643	GA20W_d20	d20	Cortex	Week_20	scRNA_5end_R2_only	Human_Neuron	1.95516	10	10	IN
GA20W_d20_AACTCCCTCCCTAATT-1	5183	2770	GA20W_d20	d20	Cortex	Week_20	scRNA_5end_R2_only	Human_Neuron	6.6524	0	0	EN
GA20W_d20_AACTCTTAGAGCTTCT-1	5622	3293	GA20W_d20	d20	Cortex	Week_20	scRNA_5end_R2_only	Human_Neuron	0.102916	1	1	EN
GA20W_d20_AACTCTTAGCCGTCGT-1	14288	4986	GA20W_d20	d20	Cortex	Week_20	scRNA_5end_R2_only	Human_Neuron	4.03373	8	8	IN_Precursor
GA20W_d20_AACTCTTCAAAGCGGT-1	3506	1946	GA20W_d20	d20	Cortex	Week_20	scRNA_5end_R2_only	Human_Neuron	3.69266	7	7	ASCL1+ IPC
GA20W_d20_AACTCTTCAACTTGAC-1	2762	1754	GA20W_d20	d20	Cortex	Week_20	scRNA_5end_R2_only	Human_Neuron	1.75685	4	4	IN
GA20W_d20_AACTCTTCAAGAAAGG-1	21811	6144	GA20W_d20	d20	Cortex	Week_20	scRNA_5end_R2_only	Human_Neuron	1.12396	7	7	ASCL1+ IPC
GA20W_d20_AACTCTTCACAAGACG-1	4488	2587	GA20W_d20	d20	Cortex	Week_20	scRNA_5end_R2_only	Human_Neuron	6.19137	10	10	IN
GA20W_d20_AACTCTTCACAGAGGT-1	6842	3084	GA20W_d20	d20	Cortex	Week_20	scRNA_5end_R2_only	Human_Neuron	2.20404	8	8	IN_Precursor
GA20W_d20_AACTCTTGTATAGGTA-1	1232	894	GA20W_d20	d20	Cortex	Week_20	scRNA_5end_R2_only	Human_Neuron	4.84115	14	14	Astro
GA20W_d20_AACTCTTGTCATATCG-1	8242	3504	GA20W_d20	d20	Cortex	Week_20	scRNA_5end_R2_only	Human_Neuron	2.084	8	8	IN_Precursor
GA20W_d20_AACTCTTGTCTCTTAT-1	5679	2661	GA20W_d20	d20	Cortex	Week_20	scRNA_5end_R2_only	Human_Neuron	2.68376	2	2	IN
GA20W_d20_AACTCTTTCAGAGCTT-1	12972	5078	GA20W_d20	d20	Cortex	Week_20	scRNA_5end_R2_only	Human_Neuron	8.7975	9	9	RG
GA20W_d20_AACTCTTTCATAACCG-1	1809	1252	GA20W_d20	d20	Cortex	Week_20	scRNA_5end_R2_only	Human_Neuron	0.21164	6	6	IN
GA20W_d20_AACTCTTTCGACCAGC-1	6791	3393	GA20W_d20	d20	Cortex	Week_20	scRNA_5end_R2_only	Human_Neuron	0.572285	0	0	EN
GA20W_d20_AACTCTTTCTTCAACT-1	8804	3848	GA20W_d20	d20	Cortex	Week_20	scRNA_5end_R2_only	Human_Neuron	0.877547	2	2	IN
GA20W_d20_AACTGGTAGAGTACAT-1	7712	3639	GA20W_d20	d20	Cortex	Week_20	scRNA_5end_R2_only	Human_Neuron	1.75042	0	0	EN
GA20W_d20_AACTGGTAGATAGGAG-1	2782	1798	GA20W_d20	d20	Cortex	Week_20	scRNA_5end_R2_only	Human_Neuron	4.2053	4	4	IN
GA20W_d20_AACTGGTAGATGGCGT-1	9839	4185	GA20W_d20	d20	Cortex	Week_20	scRNA_5end_R2_only	Human_Neuron	1.75749	1	1	EN
GA20W_d20_AACTGGTAGCAGGCTA-1	15446	5282	GA20W_d20	d20	Cortex	Week_20	scRNA_5end_R2_only	Human_Neuron	3.65586	9	9	RG
GA20W_d20_AACTGGTAGGACACCA-1	5167	2544	GA20W_d20	d20	Cortex	Week_20	scRNA_5end_R2_only	Human_Neuron	1.53981	10	10	IN
GA20W_d20_AACTGGTCAAACGTGG-1	2652	1680	GA20W_d20	d20	Cortex	Week_20	scRNA_5end_R2_only	Human_Neuron	4.16815	4	4	IN
GA20W_d20_AACTGGTCAGTATCTG-1	6830	3220	GA20W_d20	d20	Cortex	Week_20	scRNA_5end_R2_only	Human_Neuron	2.35992	2	2	IN
GA20W_d20_AACTGGTGTCCGAATT-1	3188	1941	GA20W_d20	d20	Cortex	Week_20	scRNA_5end_R2_only	Human_Neuron	4.18025	2	2	IN
GA20W_d20_AACTGGTGTGGTACAG-1	858	683	GA20W_d20	d20	Cortex	Week_20	scRNA_5end_R2_only	Human_Neuron	9.30714	6	6	IN
GA20W_d20_AACTGGTGTGTGTGCC-1	20537	6085	GA20W_d20	d20	Cortex	Week_20	scRNA_5end_R2_only	Human_Neuron	3.35783	7	7	ASCL1+ IPC
GA20W_d20_AACTGGTTCACTGGGC-1	11065	4435	GA20W_d20	d20	Cortex	Week_20	scRNA_5end_R2_only	Human_Neuron	1.84332	7	7	ASCL1+ IPC
GA20W_d20_AACTGGTTCCGGGTGT-1	14026	5156	GA20W_d20	d20	Cortex	Week_20	scRNA_5end_R2_only	Human_Neuron	0.989969	7	7	ASCL1+ IPC
GA20W_d20_AACTTTCAGATATGGT-1	3581	2134	GA20W_d20	d20	Cortex	Week_20	scRNA_5end_R2_only	Human_Neuron	2.24632	2	2	IN
GA20W_d20_AACTTTCAGGCGACAT-1	810	624	GA20W_d20	d20	Cortex	Week_20	scRNA_5end_R2_only	Human_Neuron	4.62963	15	15	Astro
GA20W_d20_AACTTTCCAGAAGCAC-1	14060	4744	GA20W_d20	d20	Cortex	Week_20	scRNA_5end_R2_only	Human_Neuron	1.94567	5	5	IN_Precursor
GA20W_d20_AACTTTCCAGCTGTTA-1	1047	801	GA20W_d20	d20	Cortex	Week_20	scRNA_5end_R2_only	Human_Neuron	7.98283	6	6	IN
GA20W_d20_AACTTTCGTCTGATTG-1	7257	3193	GA20W_d20	d20	Cortex	Week_20	scRNA_5end_R2_only	Human_Neuron	2.70472	5	5	IN_Precursor
GA20W_d20_AACTTTCGTGGAAAGA-1	926	634	GA20W_d20	d20	Cortex	Week_20	scRNA_5end_R2_only	Human_Neuron	12.3005	6	6	IN
GA20W_d20_AACTTTCTCCTCGCAT-1	9370	3777	GA20W_d20	d20	Cortex	Week_20	scRNA_5end_R2_only	Human_Neuron	1.64656	5	5	IN_Precursor
GA20W_d20_AACTTTCTCGTGGACC-1	10278	4087	GA20W_d20	d20	Cortex	Week_20	scRNA_5end_R2_only	Human_Neuron	1.09835	7	7	ASCL1+ IPC
GA20W_d20_AAGACCTAGGGAAACA-1	1211	810	GA20W_d20	d20	Cortex	Week_20	scRNA_5end_R2_only	Human_Neuron	19.4626	15	15	Astro
GA20W_d20_AAGACCTAGGTCATCT-1	8691	3550	GA20W_d20	d20	Cortex	Week_20	scRNA_5end_R2_only	Human_Neuron	1.02521	5	5	IN_Precursor
GA20W_d20_AAGACCTCAGACAAAT-1	10972	4052	GA20W_d20	d20	Cortex	Week_20	scRNA_5end_R2_only	Human_Neuron	2.32334	10	10	IN
GA20W_d20_AAGACCTGTACCAGTT-1	9032	3601	GA20W_d20	d20	Cortex	Week_20	scRNA_5end_R2_only	Human_Neuron	2.11924	2	2	IN
GA20W_d20_AAGACCTTCAAAGACA-1	13932	4899	GA20W_d20	d20	Cortex	Week_20	scRNA_5end_R2_only	Human_Neuron	2.07323	2	2	IN
GA20W_d20_AAGCCGCAGCCCAATT-1	7839	3346	GA20W_d20	d20	Cortex	Week_20	scRNA_5end_R2_only	Human_Neuron	0.966761	7	7	ASCL1+ IPC
GA20W_d20_AAGCCGCAGTGGTCCC-1	11202	4266	GA20W_d20	d20	Cortex	Week_20	scRNA_5end_R2_only	Human_Neuron	1.06889	2	2	IN
GA20W_d20_AAGCCGCCAAACAACA-1	16879	5694	GA20W_d20	d20	Cortex	Week_20	scRNA_5end_R2_only	Human_Neuron	1.17403	13	13	Oligo
GA20W_d20_AAGCCGCCAAGGACTG-1	1946	1422	GA20W_d20	d20	Cortex	Week_20	scRNA_5end_R2_only	Human_Neuron	0.753012	15	15	Astro
GA20W_d20_AAGCCGCCACAGACAG-1	6642	3370	GA20W_d20	d20	Cortex	Week_20	scRNA_5end_R2_only	Human_Neuron	0.88054	17	17	IN
GA20W_d20_AAGCCGCCAGACAAGC-1	6628	3093	GA20W_d20	d20	Cortex	Week_20	scRNA_5end_R2_only	Human_Neuron	1.79005	3	3	EOMES+ IPC
GA20W_d20_AAGCCGCCATTCGACA-1	558	421	GA20W_d20	d20	Cortex	Week_20	scRNA_5end_R2_only	Human_Neuron	0.176678	6	6	IN
GA20W_d20_AAGCCGCGTGGGTCAA-1	1494	1109	GA20W_d20	d20	Cortex	Week_20	scRNA_5end_R2_only	Human_Neuron	8.10976	4	4	IN
GA20W_d20_AAGCCGCGTGTTGGGA-1	10890	4282	GA20W_d20	d20	Cortex	Week_20	scRNA_5end_R2_only	Human_Neuron	0.350907	0	0	EN
GA20W_d20_AAGCCGCGTTTGCATG-1	17596	5307	GA20W_d20	d20	Cortex	Week_20	scRNA_5end_R2_only	Human_Neuron	2.01475	7	7	ASCL1+ IPC
GA20W_d20_AAGCCGCTCACTTACT-1	7329	3049	GA20W_d20	d20	Cortex	Week_20	scRNA_5end_R2_only	Human_Neuron	0.732821	8	8	IN_Precursor
GA20W_d20_AAGCCGCTCCAGAAGG-1	7623	3316	GA20W_d20	d20	Cortex	Week_20	scRNA_5end_R2_only	Human_Neuron	2.04814	3	3	EOMES+ IPC
GA20W_d20_AAGCCGCTCCTAGTGA-1	6754	3357	GA20W_d20	d20	Cortex	Week_20	scRNA_5end_R2_only	Human_Neuron	2.01161	1	1	EN
GA20W_d20_AAGCCGCTCCTCTAGC-1	10147	4180	GA20W_d20	d20	Cortex	Week_20	scRNA_5end_R2_only	Human_Neuron	1.9724	4	4	IN
GA20W_d20_AAGGAGCAGAACAATC-1	6052	3323	GA20W_d20	d20	Cortex	Week_20	scRNA_5end_R2_only	Human_Neuron	6.59502	12	12	EN
GA20W_d20_AAGGAGCAGACTAAGT-1	1069	722	GA20W_d20	d20	Cortex	Week_20	scRNA_5end_R2_only	Human_Neuron	0	16	16	RG
GA20W_d20_AAGGAGCAGAGGGCTT-1	6559	3007	GA20W_d20	d20	Cortex	Week_20	scRNA_5end_R2_only	Human_Neuron	2.9316	2	2	IN
GA20W_d20_AAGGAGCAGAGTAAGG-1	5104	2906	GA20W_d20	d20	Cortex	Week_20	scRNA_5end_R2_only	Human_Neuron	0.131628	1	1	EN
GA20W_d20_AAGGAGCAGATGGCGT-1	721	572	GA20W_d20	d20	Cortex	Week_20	scRNA_5end_R2_only	Human_Neuron	11.4495	6	6	IN
GA20W_d20_AAGGAGCCAAGCCGTC-1	1054	727	GA20W_d20	d20	Cortex	Week_20	scRNA_5end_R2_only	Human_Neuron	0	16	16	RG
GA20W_d20_AAGGAGCCAGCTCCGA-1	6953	3473	GA20W_d20	d20	Cortex	Week_20	scRNA_5end_R2_only	Human_Neuron	2.93285	0	0	EN
GA20W_d20_AAGGAGCCAGTGACAG-1	10135	3947	GA20W_d20	d20	Cortex	Week_20	scRNA_5end_R2_only	Human_Neuron	2.29097	10	10	IN
GA20W_d20_AAGGAGCGTTACGACT-1	7956	3484	GA20W_d20	d20	Cortex	Week_20	scRNA_5end_R2_only	Human_Neuron	1.45648	2	2	IN
GA20W_d20_AAGGCAGAGAAGGTTT-1	6742	3468	GA20W_d20	d20	Cortex	Week_20	scRNA_5end_R2_only	Human_Neuron	4.59403	0	0	EN
GA20W_d20_AAGGCAGAGCCTATGT-1	15083	5373	GA20W_d20	d20	Cortex	Week_20	scRNA_5end_R2_only	Human_Neuron	1.28467	18	18	EN
GA20W_d20_AAGGCAGAGTCACGCC-1	10274	3868	GA20W_d20	d20	Cortex	Week_20	scRNA_5end_R2_only	Human_Neuron	1.71227	5	5	IN_Precursor
GA20W_d20_AAGGCAGTCCTTGCCA-1	8184	3648	GA20W_d20	d20	Cortex	Week_20	scRNA_5end_R2_only	Human_Neuron	2.19298	4	4	IN
GA20W_d20_AAGGCAGTCTGCGACG-1	26441	6521	GA20W_d20	d20	Cortex	Week_20	scRNA_5end_R2_only	Human_Neuron	1.13829	8	8	IN_Precursor
GA20W_d20_AAGGTTCAGAGTGAGA-1	8918	3564	GA20W_d20	d20	Cortex	Week_20	scRNA_5end_R2_only	Human_Neuron	2.96105	10	10	IN
GA20W_d20_AAGGTTCAGGGATGGG-1	18871	5694	GA20W_d20	d20	Cortex	Week_20	scRNA_5end_R2_only	Human_Neuron	2.13946	8	8	IN_Precursor
GA20W_d20_AAGGTTCAGGTAGCCA-1	6182	3078	GA20W_d20	d20	Cortex	Week_20	scRNA_5end_R2_only	Human_Neuron	1.08131	3	3	EOMES+ IPC
GA20W_d20_AAGGTTCAGTACTTGC-1	13178	4445	GA20W_d20	d20	Cortex	Week_20	scRNA_5end_R2_only	Human_Neuron	0.54276	5	5	IN_Precursor
GA20W_d20_AAGGTTCAGTTGTAGA-1	2815	1804	GA20W_d20	d20	Cortex	Week_20	scRNA_5end_R2_only	Human_Neuron	1.44026	4	4	IN
GA20W_d20_AAGGTTCCACTGTGTA-1	6548	3120	GA20W_d20	d20	Cortex	Week_20	scRNA_5end_R2_only	Human_Neuron	1.73154	3	3	EOMES+ IPC
GA20W_d20_AAGGTTCCAGTCGATT-1	2801	1840	GA20W_d20	d20	Cortex	Week_20	scRNA_5end_R2_only	Human_Neuron	1.23203	13	13	Oligo
GA20W_d20_AAGGTTCCATTTGCTT-1	19335	5830	GA20W_d20	d20	Cortex	Week_20	scRNA_5end_R2_only	Human_Neuron	0.887436	5	5	IN_Precursor
GA20W_d20_AAGGTTCGTCGAGTTT-1	2416	1700	GA20W_d20	d20	Cortex	Week_20	scRNA_5end_R2_only	Human_Neuron	14.0092	12	12	EN
GA20W_d20_AAGGTTCGTTGCCTCT-1	11938	4352	GA20W_d20	d20	Cortex	Week_20	scRNA_5end_R2_only	Human_Neuron	1.23484	5	5	IN_Precursor
GA20W_d20_AAGGTTCTCAGGCCCA-1	17191	5597	GA20W_d20	d20	Cortex	Week_20	scRNA_5end_R2_only	Human_Neuron	2.40239	7	7	ASCL1+ IPC
GA20W_d20_AAGGTTCTCCTCGCAT-1	12087	4124	GA20W_d20	d20	Cortex	Week_20	scRNA_5end_R2_only	Human_Neuron	1.03022	8	8	IN_Precursor
GA20W_d20_AAGGTTCTCGGTTAAC-1	13954	5292	GA20W_d20	d20	Cortex	Week_20	scRNA_5end_R2_only	Human_Neuron	2.32471	7	7	ASCL1+ IPC
GA20W_d20_AAGGTTCTCTTGTCAT-1	2844	1781	GA20W_d20	d20	Cortex	Week_20	scRNA_5end_R2_only	Human_Neuron	2.331	4	4	IN
GA20W_d20_AAGTCTGCACAGCCCA-1	9521	4284	GA20W_d20	d20	Cortex	Week_20	scRNA_5end_R2_only	Human_Neuron	1.44165	18	18	EN
GA20W_d20_AAGTCTGCAGTAGAGC-1	2785	1781	GA20W_d20	d20	Cortex	Week_20	scRNA_5end_R2_only	Human_Neuron	2.83428	4	4	IN
GA20W_d20_AAGTCTGCATGTTGAC-1	8562	3702	GA20W_d20	d20	Cortex	Week_20	scRNA_5end_R2_only	Human_Neuron	0.259403	0	0	EN
GA20W_d20_AAGTCTGGTTAGTGGG-1	4955	2641	GA20W_d20	d20	Cortex	Week_20	scRNA_5end_R2_only	Human_Neuron	3.74185	2	2	IN
GA20W_d20_AAGTCTGTCACGCATA-1	13692	4867	GA20W_d20	d20	Cortex	Week_20	scRNA_5end_R2_only	Human_Neuron	1.41406	4	4	IN
GA20W_d20_AAGTCTGTCAGTTTGG-1	6613	2946	GA20W_d20	d20	Cortex	Week_20	scRNA_5end_R2_only	Human_Neuron	2.23539	2	2	IN
GA20W_d20_AATCCAGAGCAAATCA-1	662	522	GA20W_d20	d20	Cortex	Week_20	scRNA_5end_R2_only	Human_Neuron	10.7713	6	6	IN
GA20W_d20_AATCCAGAGCGTGAGT-1	8942	3865	GA20W_d20	d20	Cortex	Week_20	scRNA_5end_R2_only	Human_Neuron	2.81371	7	7	ASCL1+ IPC
GA20W_d20_AATCCAGAGTAAGTAC-1	10638	4272	GA20W_d20	d20	Cortex	Week_20	scRNA_5end_R2_only	Human_Neuron	1.1543	2	2	IN
GA20W_d20_AATCCAGCATCAGTAC-1	4489	2546	GA20W_d20	d20	Cortex	Week_20	scRNA_5end_R2_only	Human_Neuron	7.28232	8	8	IN_Precursor
GA20W_d20_AATCCAGGTCATCGGC-1	11858	3875	GA20W_d20	d20	Cortex	Week_20	scRNA_5end_R2_only	Human_Neuron	2.11056	8	8	IN_Precursor
GA20W_d20_AATCCAGGTCCTCTTG-1	4749	2705	GA20W_d20	d20	Cortex	Week_20	scRNA_5end_R2_only	Human_Neuron	0.680272	0	0	EN
GA20W_d20_AATCCAGGTCGAGTTT-1	466	409	GA20W_d20	d20	Cortex	Week_20	scRNA_5end_R2_only	Human_Neuron	11.7647	6	6	IN
GA20W_d20_AATCCAGTCATGTCCC-1	5626	2700	GA20W_d20	d20	Cortex	Week_20	scRNA_5end_R2_only	Human_Neuron	1.68584	2	2	IN
GA20W_d20_AATCGGTAGAGGTAGA-1	6430	2950	GA20W_d20	d20	Cortex	Week_20	scRNA_5end_R2_only	Human_Neuron	3.31176	7	7	ASCL1+ IPC
GA20W_d20_AATCGGTAGTCCCACG-1	3351	2024	GA20W_d20	d20	Cortex	Week_20	scRNA_5end_R2_only	Human_Neuron	6.39318	2	2	IN
GA20W_d20_AATCGGTCAATGCCAT-1	4747	2656	GA20W_d20	d20	Cortex	Week_20	scRNA_5end_R2_only	Human_Neuron	1.81098	4	4	IN
GA20W_d20_AATCGGTCACGACGAA-1	11669	4434	GA20W_d20	d20	Cortex	Week_20	scRNA_5end_R2_only	Human_Neuron	2.24627	4	4	IN
GA20W_d20_AATCGGTCACGTAAGG-1	18356	5394	GA20W_d20	d20	Cortex	Week_20	scRNA_5end_R2_only	Human_Neuron	1.50598	8	8	IN_Precursor
GA20W_d20_AATCGGTCATTCACTT-1	26457	6897	GA20W_d20	d20	Cortex	Week_20	scRNA_5end_R2_only	Human_Neuron	2.94957	13	13	Oligo
GA20W_d20_AATCGGTGTAAGGGCT-1	3574	2159	GA20W_d20	d20	Cortex	Week_20	scRNA_5end_R2_only	Human_Neuron	1.97487	2	2	IN
GA20W_d20_AATCGGTGTCACTGGC-1	2168	1510	GA20W_d20	d20	Cortex	Week_20	scRNA_5end_R2_only	Human_Neuron	0.440917	4	4	IN
GA20W_d20_AATCGGTGTCGACTGC-1	8212	3827	GA20W_d20	d20	Cortex	Week_20	scRNA_5end_R2_only	Human_Neuron	0.225175	17	17	IN
GA20W_d20_AATCGGTGTCTAAAGA-1	4250	2578	GA20W_d20	d20	Cortex	Week_20	scRNA_5end_R2_only	Human_Neuron	0.336323	1	1	EN
GA20W_d20_AATCGGTTCACATGCA-1	23588	6527	GA20W_d20	d20	Cortex	Week_20	scRNA_5end_R2_only	Human_Neuron	1.16105	11	11	EN
GA20W_d20_AATCGGTTCATGTCTT-1	5995	2845	GA20W_d20	d20	Cortex	Week_20	scRNA_5end_R2_only	Human_Neuron	1.88148	4	4	IN
GA20W_d20_AATCGGTTCCCTTGTG-1	11838	4700	GA20W_d20	d20	Cortex	Week_20	scRNA_5end_R2_only	Human_Neuron	1.52727	17	17	IN
GA20W_d20_AATCGGTTCTGCCCTA-1	1464	1101	GA20W_d20	d20	Cortex	Week_20	scRNA_5end_R2_only	Human_Neuron	10.1869	6	6	IN
GA20W_d20_ACACCAAAGAACTCGG-1	1012	771	GA20W_d20	d20	Cortex	Week_20	scRNA_5end_R2_only	Human_Neuron	9.67458	6	6	IN
GA20W_d20_ACACCAAAGATATGGT-1	5758	3090	GA20W_d20	d20	Cortex	Week_20	scRNA_5end_R2_only	Human_Neuron	1.58705	2	2	IN
GA20W_d20_ACACCAAAGTCCAGGA-1	13683	5019	GA20W_d20	d20	Cortex	Week_20	scRNA_5end_R2_only	Human_Neuron	4.02953	11	11	EN
GA20W_d20_ACACCAAAGTTCGCAT-1	9502	4008	GA20W_d20	d20	Cortex	Week_20	scRNA_5end_R2_only	Human_Neuron	0.484449	0	0	EN
GA20W_d20_ACACCAAAGTTGAGAT-1	14929	4973	GA20W_d20	d20	Cortex	Week_20	scRNA_5end_R2_only	Human_Neuron	1.64131	7	7	ASCL1+ IPC
GA20W_d20_ACACCAACAACTGGCC-1	5750	2632	GA20W_d20	d20	Cortex	Week_20	scRNA_5end_R2_only	Human_Neuron	0.85416	8	8	IN_Precursor
GA20W_d20_ACACCAACATCGGGTC-1	4852	2671	GA20W_d20	d20	Cortex	Week_20	scRNA_5end_R2_only	Human_Neuron	0.720826	1	1	EN
GA20W_d20_ACACCAAGTACGCACC-1	35583	7788	GA20W_d20	d20	Cortex	Week_20	scRNA_5end_R2_only	Human_Neuron	1.09485	13	13	Oligo
GA20W_d20_ACACCAATCGTCCAGG-1	17544	5655	GA20W_d20	d20	Cortex	Week_20	scRNA_5end_R2_only	Human_Neuron	1.08436	7	7	ASCL1+ IPC
GA20W_d20_ACACCAATCTGGTGTA-1	16188	5500	GA20W_d20	d20	Cortex	Week_20	scRNA_5end_R2_only	Human_Neuron	2.32418	7	7	ASCL1+ IPC
GA20W_d20_ACACCAATCTTGTTTG-1	6015	2862	GA20W_d20	d20	Cortex	Week_20	scRNA_5end_R2_only	Human_Neuron	0.922807	2	2	IN
GA20W_d20_ACACCCTCACGGATAG-1	4736	2710	GA20W_d20	d20	Cortex	Week_20	scRNA_5end_R2_only	Human_Neuron	2.55141	4	4	IN
GA20W_d20_ACACCCTCACGGCCAT-1	3000	1926	GA20W_d20	d20	Cortex	Week_20	scRNA_5end_R2_only	Human_Neuron	0.91425	2	2	IN
GA20W_d20_ACACCCTCACGGCGTT-1	10327	4255	GA20W_d20	d20	Cortex	Week_20	scRNA_5end_R2_only	Human_Neuron	0.893173	0	0	EN
GA20W_d20_ACACCCTCAGACAAGC-1	6149	3145	GA20W_d20	d20	Cortex	Week_20	scRNA_5end_R2_only	Human_Neuron	5.93056	18	18	EN
GA20W_d20_ACACCCTTCAGCATGT-1	9304	4122	GA20W_d20	d20	Cortex	Week_20	scRNA_5end_R2_only	Human_Neuron	2.27679	7	7	ASCL1+ IPC
GA20W_d20_ACACCCTTCGATCCCT-1	725	562	GA20W_d20	d20	Cortex	Week_20	scRNA_5end_R2_only	Human_Neuron	14.6853	15	15	Astro
GA20W_d20_ACACCGGAGGTGATAT-1	3444	1964	GA20W_d20	d20	Cortex	Week_20	scRNA_5end_R2_only	Human_Neuron	0.384299	4	4	IN
GA20W_d20_ACACCGGAGTCTTGCA-1	9972	3851	GA20W_d20	d20	Cortex	Week_20	scRNA_5end_R2_only	Human_Neuron	3.45396	5	5	IN_Precursor
GA20W_d20_ACACCGGCAATGTTGC-1	10479	4118	GA20W_d20	d20	Cortex	Week_20	scRNA_5end_R2_only	Human_Neuron	1.97078	5	5	IN_Precursor
GA20W_d20_ACACCGGCACCCATGG-1	4063	2249	GA20W_d20	d20	Cortex	Week_20	scRNA_5end_R2_only	Human_Neuron	1.48037	2	2	IN
GA20W_d20_ACACCGGCACGGCCAT-1	17134	5370	GA20W_d20	d20	Cortex	Week_20	scRNA_5end_R2_only	Human_Neuron	2.77325	7	7	ASCL1+ IPC
GA20W_d20_ACACCGGGTATTACCG-1	14885	4750	GA20W_d20	d20	Cortex	Week_20	scRNA_5end_R2_only	Human_Neuron	2.98526	8	8	IN_Precursor
GA20W_d20_ACACCGGTCATTGCCC-1	5804	2749	GA20W_d20	d20	Cortex	Week_20	scRNA_5end_R2_only	Human_Neuron	1.43819	2	2	IN
GA20W_d20_ACACCGGTCCCACTTG-1	3375	2068	GA20W_d20	d20	Cortex	Week_20	scRNA_5end_R2_only	Human_Neuron	1.63102	2	2	IN
GA20W_d20_ACACCGGTCCCTCAGT-1	30499	7155	GA20W_d20	d20	Cortex	Week_20	scRNA_5end_R2_only	Human_Neuron	1.51698	8	8	IN_Precursor
GA20W_d20_ACACCGGTCCTCATTA-1	5444	3018	GA20W_d20	d20	Cortex	Week_20	scRNA_5end_R2_only	Human_Neuron	2.00588	1	1	EN
GA20W_d20_ACACTGACACTATCTT-1	14178	5215	GA20W_d20	d20	Cortex	Week_20	scRNA_5end_R2_only	Human_Neuron	0.249951	0	0	EN
GA20W_d20_ACACTGACATTGGGCC-1	1778	1236	GA20W_d20	d20	Cortex	Week_20	scRNA_5end_R2_only	Human_Neuron	6.74624	6	6	IN
GA20W_d20_ACACTGAGTAGCGCAA-1	18665	5523	GA20W_d20	d20	Cortex	Week_20	scRNA_5end_R2_only	Human_Neuron	2.05865	8	8	IN_Precursor
GA20W_d20_ACACTGAGTTAAGGGC-1	1176	925	GA20W_d20	d20	Cortex	Week_20	scRNA_5end_R2_only	Human_Neuron	14.3463	12	12	EN
GA20W_d20_ACACTGAGTTGAGTTC-1	13628	4759	GA20W_d20	d20	Cortex	Week_20	scRNA_5end_R2_only	Human_Neuron	3.10515	11	11	EN
GA20W_d20_ACACTGATCAACGAAA-1	10170	4337	GA20W_d20	d20	Cortex	Week_20	scRNA_5end_R2_only	Human_Neuron	0.847754	0	0	EN
GA20W_d20_ACAGCCGAGAACTGTA-1	7033	3070	GA20W_d20	d20	Cortex	Week_20	scRNA_5end_R2_only	Human_Neuron	3.29072	2	2	IN
GA20W_d20_ACAGCCGAGAGGGCTT-1	5617	3120	GA20W_d20	d20	Cortex	Week_20	scRNA_5end_R2_only	Human_Neuron	5.0727	14	14	Astro
GA20W_d20_ACAGCCGAGTGTCTCA-1	726	575	GA20W_d20	d20	Cortex	Week_20	scRNA_5end_R2_only	Human_Neuron	14.1852	6	6	IN
GA20W_d20_ACAGCCGGTATATGGA-1	4139	2363	GA20W_d20	d20	Cortex	Week_20	scRNA_5end_R2_only	Human_Neuron	1.41249	2	2	IN
GA20W_d20_ACAGCCGGTATGAAAC-1	8235	3750	GA20W_d20	d20	Cortex	Week_20	scRNA_5end_R2_only	Human_Neuron	0.832583	0	0	EN
GA20W_d20_ACAGCCGGTCCGAGTC-1	5431	2730	GA20W_d20	d20	Cortex	Week_20	scRNA_5end_R2_only	Human_Neuron	1.2965	13	13	Oligo
GA20W_d20_ACAGCCGGTCGGCATC-1	6110	3265	GA20W_d20	d20	Cortex	Week_20	scRNA_5end_R2_only	Human_Neuron	2.31452	0	0	EN
GA20W_d20_ACAGCCGGTCTTCGTC-1	2138	1532	GA20W_d20	d20	Cortex	Week_20	scRNA_5end_R2_only	Human_Neuron	4.41627	4	4	IN
GA20W_d20_ACAGCCGGTGTTTGGT-1	593	459	GA20W_d20	d20	Cortex	Week_20	scRNA_5end_R2_only	Human_Neuron	8.37139	6	6	IN
GA20W_d20_ACAGCCGTCAGCATGT-1	5604	3101	GA20W_d20	d20	Cortex	Week_20	scRNA_5end_R2_only	Human_Neuron	2.00493	1	1	EN
GA20W_d20_ACAGCCGTCGATGAGG-1	37453	7609	GA20W_d20	d20	Cortex	Week_20	scRNA_5end_R2_only	Human_Neuron	1.50999	7	7	ASCL1+ IPC
GA20W_d20_ACAGCCGTCTGAGTGT-1	7465	3300	GA20W_d20	d20	Cortex	Week_20	scRNA_5end_R2_only	Human_Neuron	1.32843	4	4	IN
GA20W_d20_ACAGCCGTCTGGCGAC-1	18143	5653	GA20W_d20	d20	Cortex	Week_20	scRNA_5end_R2_only	Human_Neuron	2.16729	5	5	IN_Precursor
GA20W_d20_ACAGCTAAGACAAGCC-1	8200	4047	GA20W_d20	d20	Cortex	Week_20	scRNA_5end_R2_only	Human_Neuron	1.94553	12	12	EN
GA20W_d20_ACAGCTAAGCGAGAAA-1	856	682	GA20W_d20	d20	Cortex	Week_20	scRNA_5end_R2_only	Human_Neuron	0.693642	6	6	IN
GA20W_d20_ACAGCTAAGGACACCA-1	14342	4756	GA20W_d20	d20	Cortex	Week_20	scRNA_5end_R2_only	Human_Neuron	1.46712	5	5	IN_Precursor
GA20W_d20_ACAGCTAAGGCCCTCA-1	10592	3936	GA20W_d20	d20	Cortex	Week_20	scRNA_5end_R2_only	Human_Neuron	1.97134	5	5	IN_Precursor
GA20W_d20_ACAGCTAAGTCCGTAT-1	8432	3421	GA20W_d20	d20	Cortex	Week_20	scRNA_5end_R2_only	Human_Neuron	1.44416	10	10	IN
GA20W_d20_ACAGCTAAGTGAACAT-1	5872	2633	GA20W_d20	d20	Cortex	Week_20	scRNA_5end_R2_only	Human_Neuron	2.6107	3	3	EOMES+ IPC
GA20W_d20_ACAGCTACATCTGGTA-1	7826	3384	GA20W_d20	d20	Cortex	Week_20	scRNA_5end_R2_only	Human_Neuron	2.02388	3	3	EOMES+ IPC
GA20W_d20_ACAGCTACATGATCCA-1	10451	4021	GA20W_d20	d20	Cortex	Week_20	scRNA_5end_R2_only	Human_Neuron	2.23468	10	10	IN
GA20W_d20_ACAGCTAGTATAGGGC-1	37576	7783	GA20W_d20	d20	Cortex	Week_20	scRNA_5end_R2_only	Human_Neuron	2.08547	9	9	RG
GA20W_d20_ACAGCTAGTCTGATCA-1	4703	2622	GA20W_d20	d20	Cortex	Week_20	scRNA_5end_R2_only	Human_Neuron	2.78373	3	3	EOMES+ IPC
GA20W_d20_ACAGCTAGTGTGAAAT-1	9693	3648	GA20W_d20	d20	Cortex	Week_20	scRNA_5end_R2_only	Human_Neuron	2.09338	8	8	IN_Precursor
GA20W_d20_ACAGCTATCTGCCAGG-1	2798	1840	GA20W_d20	d20	Cortex	Week_20	scRNA_5end_R2_only	Human_Neuron	4.40895	0	0	EN
GA20W_d20_ACAGCTATCTTATCTG-1	1392	896	GA20W_d20	d20	Cortex	Week_20	scRNA_5end_R2_only	Human_Neuron	0	16	16	RG
GA20W_d20_ACATACGAGAAGGTTT-1	3087	1938	GA20W_d20	d20	Cortex	Week_20	scRNA_5end_R2_only	Human_Neuron	0.517346	2	2	IN
GA20W_d20_ACATACGAGGGATACC-1	8509	3942	GA20W_d20	d20	Cortex	Week_20	scRNA_5end_R2_only	Human_Neuron	1.27367	18	18	EN
GA20W_d20_ACATACGCACGCATCG-1	11633	4390	GA20W_d20	d20	Cortex	Week_20	scRNA_5end_R2_only	Human_Neuron	1.87337	5	5	IN_Precursor
GA20W_d20_ACATACGCACGGATAG-1	19767	5472	GA20W_d20	d20	Cortex	Week_20	scRNA_5end_R2_only	Human_Neuron	1.86818	8	8	IN_Precursor
GA20W_d20_ACATACGCATTTGCTT-1	2189	1346	GA20W_d20	d20	Cortex	Week_20	scRNA_5end_R2_only	Human_Neuron	0	16	16	RG
GA20W_d20_ACATACGGTACTTGAC-1	30815	7021	GA20W_d20	d20	Cortex	Week_20	scRNA_5end_R2_only	Human_Neuron	1.50902	8	8	IN_Precursor
GA20W_d20_ACATACGGTTTACTCT-1	1099	742	GA20W_d20	d20	Cortex	Week_20	scRNA_5end_R2_only	Human_Neuron	2.95909	6	6	IN
GA20W_d20_ACATACGTCCAGTATG-1	3509	2153	GA20W_d20	d20	Cortex	Week_20	scRNA_5end_R2_only	Human_Neuron	1.67189	2	2	IN
GA20W_d20_ACATACGTCTGCGTAA-1	11154	4275	GA20W_d20	d20	Cortex	Week_20	scRNA_5end_R2_only	Human_Neuron	1.58681	10	10	IN
GA20W_d20_ACATCAGAGCGAGAAA-1	11839	4292	GA20W_d20	d20	Cortex	Week_20	scRNA_5end_R2_only	Human_Neuron	1.78491	10	10	IN
GA20W_d20_ACATCAGAGCTAGTTC-1	9709	4017	GA20W_d20	d20	Cortex	Week_20	scRNA_5end_R2_only	Human_Neuron	2.9724	5	5	IN_Precursor
GA20W_d20_ACATCAGAGGAATGGA-1	5280	2508	GA20W_d20	d20	Cortex	Week_20	scRNA_5end_R2_only	Human_Neuron	2.48645	2	2	IN
GA20W_d20_ACATCAGCACCGAATT-1	3253	2000	GA20W_d20	d20	Cortex	Week_20	scRNA_5end_R2_only	Human_Neuron	0.322865	4	4	IN
GA20W_d20_ACATCAGCAGCTTCGG-1	803	680	GA20W_d20	d20	Cortex	Week_20	scRNA_5end_R2_only	Human_Neuron	6.87361	6	6	IN
GA20W_d20_ACATCAGCATCACGAT-1	6129	3069	GA20W_d20	d20	Cortex	Week_20	scRNA_5end_R2_only	Human_Neuron	2.67159	10	10	IN
GA20W_d20_ACATCAGCATGCTGGC-1	11995	4259	GA20W_d20	d20	Cortex	Week_20	scRNA_5end_R2_only	Human_Neuron	2.12734	5	5	IN_Precursor
GA20W_d20_ACATCAGGTCTCTCTG-1	5240	2827	GA20W_d20	d20	Cortex	Week_20	scRNA_5end_R2_only	Human_Neuron	1.75531	2	2	IN
GA20W_d20_ACATCAGTCGCATGGC-1	18105	4992	GA20W_d20	d20	Cortex	Week_20	scRNA_5end_R2_only	Human_Neuron	0.908445	8	8	IN_Precursor
GA20W_d20_ACATGGTAGGCTACGA-1	7861	3540	GA20W_d20	d20	Cortex	Week_20	scRNA_5end_R2_only	Human_Neuron	1.5482	8	8	IN_Precursor
GA20W_d20_ACATGGTCAAGCTGTT-1	15617	4990	GA20W_d20	d20	Cortex	Week_20	scRNA_5end_R2_only	Human_Neuron	2.82316	5	5	IN_Precursor
GA20W_d20_ACATGGTCACTATCTT-1	6725	3401	GA20W_d20	d20	Cortex	Week_20	scRNA_5end_R2_only	Human_Neuron	4.07598	13	13	Oligo
GA20W_d20_ACATGGTCAGTAAGCG-1	12745	4672	GA20W_d20	d20	Cortex	Week_20	scRNA_5end_R2_only	Human_Neuron	1.91606	10	10	IN
GA20W_d20_ACATGGTGTCAGAATA-1	22361	6261	GA20W_d20	d20	Cortex	Week_20	scRNA_5end_R2_only	Human_Neuron	2.1411	7	7	ASCL1+ IPC
GA20W_d20_ACATGGTGTCAGAGGT-1	3576	2313	GA20W_d20	d20	Cortex	Week_20	scRNA_5end_R2_only	Human_Neuron	10.5337	7	7	ASCL1+ IPC
GA20W_d20_ACATGGTGTCGACTGC-1	7618	3425	GA20W_d20	d20	Cortex	Week_20	scRNA_5end_R2_only	Human_Neuron	1.23864	3	3	EOMES+ IPC
GA20W_d20_ACATGGTGTTGTACAC-1	9892	4188	GA20W_d20	d20	Cortex	Week_20	scRNA_5end_R2_only	Human_Neuron	2.81529	13	13	Oligo
GA20W_d20_ACATGGTTCAACGCTA-1	2375	1614	GA20W_d20	d20	Cortex	Week_20	scRNA_5end_R2_only	Human_Neuron	1.30187	4	4	IN
GA20W_d20_ACATGGTTCAACGGCC-1	6344	3248	GA20W_d20	d20	Cortex	Week_20	scRNA_5end_R2_only	Human_Neuron	2.19512	1	1	EN
GA20W_d20_ACATGGTTCCTTGACC-1	3585	2049	GA20W_d20	d20	Cortex	Week_20	scRNA_5end_R2_only	Human_Neuron	5.06888	13	13	Oligo
GA20W_d20_ACATGGTTCTACTATC-1	5476	2498	GA20W_d20	d20	Cortex	Week_20	scRNA_5end_R2_only	Human_Neuron	0.705413	16	16	RG
GA20W_d20_ACCAGTAAGAACTCGG-1	1369	906	GA20W_d20	d20	Cortex	Week_20	scRNA_5end_R2_only	Human_Neuron	0	16	16	RG
GA20W_d20_ACCAGTAAGAATTGTG-1	11799	4501	GA20W_d20	d20	Cortex	Week_20	scRNA_5end_R2_only	Human_Neuron	1.77412	9	9	RG
GA20W_d20_ACCAGTAAGTAGATGT-1	3101	1961	GA20W_d20	d20	Cortex	Week_20	scRNA_5end_R2_only	Human_Neuron	3.92216	4	4	IN
GA20W_d20_ACCAGTACACTGCCAG-1	2995	1808	GA20W_d20	d20	Cortex	Week_20	scRNA_5end_R2_only	Human_Neuron	1.76045	2	2	IN
GA20W_d20_ACCAGTACAGTAAGAT-1	5789	2693	GA20W_d20	d20	Cortex	Week_20	scRNA_5end_R2_only	Human_Neuron	2.27273	2	2	IN
GA20W_d20_ACCAGTACATCACGAT-1	5669	2725	GA20W_d20	d20	Cortex	Week_20	scRNA_5end_R2_only	Human_Neuron	3.52384	2	2	IN
GA20W_d20_ACCAGTACATGCCTAA-1	800	597	GA20W_d20	d20	Cortex	Week_20	scRNA_5end_R2_only	Human_Neuron	1.82704	6	6	IN
GA20W_d20_ACCAGTATCATCGGAT-1	1466	1096	GA20W_d20	d20	Cortex	Week_20	scRNA_5end_R2_only	Human_Neuron	12.4927	15	15	Astro
GA20W_d20_ACCAGTATCATTATCC-1	8325	3584	GA20W_d20	d20	Cortex	Week_20	scRNA_5end_R2_only	Human_Neuron	3.03838	3	3	EOMES+ IPC
GA20W_d20_ACCAGTATCCATGAAC-1	6276	3282	GA20W_d20	d20	Cortex	Week_20	scRNA_5end_R2_only	Human_Neuron	6.9373	8	8	IN_Precursor
GA20W_d20_ACCAGTATCGCGGATC-1	31591	7317	GA20W_d20	d20	Cortex	Week_20	scRNA_5end_R2_only	Human_Neuron	1.3768	8	8	IN_Precursor
GA20W_d20_ACCCACTAGAGCCTAG-1	1795	1073	GA20W_d20	d20	Cortex	Week_20	scRNA_5end_R2_only	Human_Neuron	0	16	16	RG
GA20W_d20_ACCCACTAGTTAAGTG-1	4053	2247	GA20W_d20	d20	Cortex	Week_20	scRNA_5end_R2_only	Human_Neuron	0.688736	2	2	IN
GA20W_d20_ACCCACTCACGCTTTC-1	14409	5327	GA20W_d20	d20	Cortex	Week_20	scRNA_5end_R2_only	Human_Neuron	1.1802	17	17	IN
GA20W_d20_ACCCACTCATTGGTAC-1	5852	2791	GA20W_d20	d20	Cortex	Week_20	scRNA_5end_R2_only	Human_Neuron	2.91519	2	2	IN
GA20W_d20_ACCCACTGTACAGACG-1	14295	4986	GA20W_d20	d20	Cortex	Week_20	scRNA_5end_R2_only	Human_Neuron	2.08218	7	7	ASCL1+ IPC
GA20W_d20_ACCCACTGTATCAGTC-1	13012	4644	GA20W_d20	d20	Cortex	Week_20	scRNA_5end_R2_only	Human_Neuron	2.57366	5	5	IN_Precursor
GA20W_d20_ACCCACTGTGCAACGA-1	1541	1100	GA20W_d20	d20	Cortex	Week_20	scRNA_5end_R2_only	Human_Neuron	0	6	6	IN
GA20W_d20_ACCCACTGTTCCACGG-1	9974	4230	GA20W_d20	d20	Cortex	Week_20	scRNA_5end_R2_only	Human_Neuron	1.92272	0	0	EN
GA20W_d20_ACCCACTGTTGGAGGT-1	7934	3320	GA20W_d20	d20	Cortex	Week_20	scRNA_5end_R2_only	Human_Neuron	1.16239	8	8	IN_Precursor
GA20W_d20_ACCCACTTCCCACTTG-1	18422	5555	GA20W_d20	d20	Cortex	Week_20	scRNA_5end_R2_only	Human_Neuron	1.45136	2	2	IN
GA20W_d20_ACCGTAAAGCAATCTC-1	17320	5362	GA20W_d20	d20	Cortex	Week_20	scRNA_5end_R2_only	Human_Neuron	3.66456	5	5	IN_Precursor
GA20W_d20_ACCGTAAAGCTTATCG-1	6010	2949	GA20W_d20	d20	Cortex	Week_20	scRNA_5end_R2_only	Human_Neuron	1.83008	4	4	IN
GA20W_d20_ACCGTAACAAGCGAGT-1	1917	1319	GA20W_d20	d20	Cortex	Week_20	scRNA_5end_R2_only	Human_Neuron	0.0496032	2	2	IN
GA20W_d20_ACCGTAACACGACTCG-1	51707	8687	GA20W_d20	d20	Cortex	Week_20	scRNA_5end_R2_only	Human_Neuron	1.24353	8	8	IN_Precursor
GA20W_d20_ACCGTAACAGGATCGA-1	2670	1804	GA20W_d20	d20	Cortex	Week_20	scRNA_5end_R2_only	Human_Neuron	0.988701	1	1	EN
GA20W_d20_ACCGTAACAGGGTTAG-1	17146	5395	GA20W_d20	d20	Cortex	Week_20	scRNA_5end_R2_only	Human_Neuron	1.27539	2	2	IN
GA20W_d20_ACCGTAACATAGACTC-1	9956	4054	GA20W_d20	d20	Cortex	Week_20	scRNA_5end_R2_only	Human_Neuron	3.65637	13	13	Oligo
GA20W_d20_ACCGTAAGTAGCACGA-1	9434	3559	GA20W_d20	d20	Cortex	Week_20	scRNA_5end_R2_only	Human_Neuron	2.06936	8	8	IN_Precursor
GA20W_d20_ACCGTAAGTTGCCTCT-1	3645	2222	GA20W_d20	d20	Cortex	Week_20	scRNA_5end_R2_only	Human_Neuron	3.36094	4	4	IN
GA20W_d20_ACCGTAAGTTTGGCGC-1	5357	2553	GA20W_d20	d20	Cortex	Week_20	scRNA_5end_R2_only	Human_Neuron	2.64687	2	2	IN
GA20W_d20_ACCGTAATCCAGATCA-1	5465	2805	GA20W_d20	d20	Cortex	Week_20	scRNA_5end_R2_only	Human_Neuron	0.939974	2	2	IN
GA20W_d20_ACCGTAATCGTTACGA-1	23202	6399	GA20W_d20	d20	Cortex	Week_20	scRNA_5end_R2_only	Human_Neuron	2.19298	9	9	RG
GA20W_d20_ACCTTTAAGAAGGTGA-1	1662	1052	GA20W_d20	d20	Cortex	Week_20	scRNA_5end_R2_only	Human_Neuron	17.7498	14	14	Astro
GA20W_d20_ACCTTTAAGCGGCTTC-1	1166	923	GA20W_d20	d20	Cortex	Week_20	scRNA_5end_R2_only	Human_Neuron	13.387	12	12	EN
GA20W_d20_ACCTTTAAGGATGCGT-1	11135	4707	GA20W_d20	d20	Cortex	Week_20	scRNA_5end_R2_only	Human_Neuron	0.896937	0	0	EN
GA20W_d20_ACCTTTAAGGGTTCCC-1	4158	2371	GA20W_d20	d20	Cortex	Week_20	scRNA_5end_R2_only	Human_Neuron	3.75729	2	2	IN
GA20W_d20_ACCTTTACAGTCTTCC-1	23665	6171	GA20W_d20	d20	Cortex	Week_20	scRNA_5end_R2_only	Human_Neuron	2.09541	8	8	IN_Precursor
GA20W_d20_ACCTTTAGTAAAGTCA-1	4693	2698	GA20W_d20	d20	Cortex	Week_20	scRNA_5end_R2_only	Human_Neuron	3.3926	17	17	IN
GA20W_d20_ACCTTTATCCTTCAAT-1	6493	3120	GA20W_d20	d20	Cortex	Week_20	scRNA_5end_R2_only	Human_Neuron	2.14609	3	3	EOMES+ IPC
GA20W_d20_ACGAGCCAGATGTTAG-1	10344	4082	GA20W_d20	d20	Cortex	Week_20	scRNA_5end_R2_only	Human_Neuron	2.14026	2	2	IN
GA20W_d20_ACGAGCCAGGCTAGAC-1	21408	5811	GA20W_d20	d20	Cortex	Week_20	scRNA_5end_R2_only	Human_Neuron	1.33218	8	8	IN_Precursor
GA20W_d20_ACGAGCCAGGTAGCTG-1	4734	2598	GA20W_d20	d20	Cortex	Week_20	scRNA_5end_R2_only	Human_Neuron	7.93296	14	14	Astro
GA20W_d20_ACGAGCCGTAAGGGCT-1	17224	5472	GA20W_d20	d20	Cortex	Week_20	scRNA_5end_R2_only	Human_Neuron	1.7057	9	9	RG
GA20W_d20_ACGAGCCGTACAGACG-1	23728	6551	GA20W_d20	d20	Cortex	Week_20	scRNA_5end_R2_only	Human_Neuron	1.61629	3	3	EOMES+ IPC
GA20W_d20_ACGAGCCGTTGAGTTC-1	6855	3189	GA20W_d20	d20	Cortex	Week_20	scRNA_5end_R2_only	Human_Neuron	2.74691	3	3	EOMES+ IPC
GA20W_d20_ACGAGCCTCATTGCGA-1	9084	3934	GA20W_d20	d20	Cortex	Week_20	scRNA_5end_R2_only	Human_Neuron	0.681751	18	18	EN
GA20W_d20_ACGAGCCTCCAGTATG-1	14411	4814	GA20W_d20	d20	Cortex	Week_20	scRNA_5end_R2_only	Human_Neuron	2.06533	7	7	ASCL1+ IPC
GA20W_d20_ACGAGCCTCTCGTATT-1	1179	831	GA20W_d20	d20	Cortex	Week_20	scRNA_5end_R2_only	Human_Neuron	4.51977	6	6	IN
GA20W_d20_ACGAGGAAGGCAATTA-1	6564	3143	GA20W_d20	d20	Cortex	Week_20	scRNA_5end_R2_only	Human_Neuron	2.04659	2	2	IN
GA20W_d20_ACGAGGAAGTAGGCCA-1	821	651	GA20W_d20	d20	Cortex	Week_20	scRNA_5end_R2_only	Human_Neuron	8.56202	6	6	IN
GA20W_d20_ACGAGGAAGTCCAGGA-1	578	474	GA20W_d20	d20	Cortex	Week_20	scRNA_5end_R2_only	Human_Neuron	10.4455	6	6	IN
GA20W_d20_ACGAGGACAAGCTGGA-1	5392	2780	GA20W_d20	d20	Cortex	Week_20	scRNA_5end_R2_only	Human_Neuron	1.14075	2	2	IN
GA20W_d20_ACGAGGACACGTCAGC-1	8083	3074	GA20W_d20	d20	Cortex	Week_20	scRNA_5end_R2_only	Human_Neuron	0.895361	5	5	IN_Precursor
GA20W_d20_ACGAGGACAGTGAGTG-1	1556	1068	GA20W_d20	d20	Cortex	Week_20	scRNA_5end_R2_only	Human_Neuron	1.75637	16	16	RG
GA20W_d20_ACGAGGAGTAAGGATT-1	10416	4258	GA20W_d20	d20	Cortex	Week_20	scRNA_5end_R2_only	Human_Neuron	1.28946	0	0	EN
GA20W_d20_ACGAGGAGTCTACCTC-1	8962	4005	GA20W_d20	d20	Cortex	Week_20	scRNA_5end_R2_only	Human_Neuron	1.13846	0	0	EN
GA20W_d20_ACGAGGAGTCTAGAGG-1	8506	3888	GA20W_d20	d20	Cortex	Week_20	scRNA_5end_R2_only	Human_Neuron	3.55551	1	1	EN
GA20W_d20_ACGAGGATCCAGGGCT-1	2309	1540	GA20W_d20	d20	Cortex	Week_20	scRNA_5end_R2_only	Human_Neuron	0.845411	4	4	IN
GA20W_d20_ACGAGGATCGCATGAT-1	4299	2276	GA20W_d20	d20	Cortex	Week_20	scRNA_5end_R2_only	Human_Neuron	5.21307	11	11	EN
GA20W_d20_ACGAGGATCGTCCAGG-1	904	731	GA20W_d20	d20	Cortex	Week_20	scRNA_5end_R2_only	Human_Neuron	0.830737	6	6	IN
GA20W_d20_ACGATACAGACTTGAA-1	14404	5214	GA20W_d20	d20	Cortex	Week_20	scRNA_5end_R2_only	Human_Neuron	2.81909	7	7	ASCL1+ IPC
GA20W_d20_ACGATACAGCTACCTA-1	1175	838	GA20W_d20	d20	Cortex	Week_20	scRNA_5end_R2_only	Human_Neuron	0	16	16	RG
GA20W_d20_ACGATACAGGCACATG-1	5012	2973	GA20W_d20	d20	Cortex	Week_20	scRNA_5end_R2_only	Human_Neuron	7.73316	1	1	EN
GA20W_d20_ACGATACAGGCTAGAC-1	15295	5448	GA20W_d20	d20	Cortex	Week_20	scRNA_5end_R2_only	Human_Neuron	2.94954	7	7	ASCL1+ IPC
GA20W_d20_ACGATACAGTGCGTGA-1	7263	3231	GA20W_d20	d20	Cortex	Week_20	scRNA_5end_R2_only	Human_Neuron	1.36119	3	3	EOMES+ IPC
GA20W_d20_ACGATACCAAGGTTTC-1	18678	5735	GA20W_d20	d20	Cortex	Week_20	scRNA_5end_R2_only	Human_Neuron	4.06901	7	7	ASCL1+ IPC
GA20W_d20_ACGATACCATAGGATA-1	544	431	GA20W_d20	d20	Cortex	Week_20	scRNA_5end_R2_only	Human_Neuron	14.93	6	6	IN
GA20W_d20_ACGATACCATTAGCCA-1	8085	3785	GA20W_d20	d20	Cortex	Week_20	scRNA_5end_R2_only	Human_Neuron	3.24836	2	2	IN
GA20W_d20_ACGATACGTACGCACC-1	10267	4081	GA20W_d20	d20	Cortex	Week_20	scRNA_5end_R2_only	Human_Neuron	2.4236	5	5	IN_Precursor
GA20W_d20_ACGATACGTGATGATA-1	8482	3898	GA20W_d20	d20	Cortex	Week_20	scRNA_5end_R2_only	Human_Neuron	0.740418	0	0	EN
GA20W_d20_ACGATACGTTTGTGTG-1	7683	3376	GA20W_d20	d20	Cortex	Week_20	scRNA_5end_R2_only	Human_Neuron	1.66491	4	4	IN
GA20W_d20_ACGATACTCTATCGCC-1	1519	1135	GA20W_d20	d20	Cortex	Week_20	scRNA_5end_R2_only	Human_Neuron	3.8531	1	1	EN
GA20W_d20_ACGATGTGTCTAGAGG-1	12047	4258	GA20W_d20	d20	Cortex	Week_20	scRNA_5end_R2_only	Human_Neuron	1.72532	5	5	IN_Precursor
GA20W_d20_ACGATGTGTCTTCAAG-1	3219	2002	GA20W_d20	d20	Cortex	Week_20	scRNA_5end_R2_only	Human_Neuron	2.91807	4	4	IN
GA20W_d20_ACGATGTTCCTAGTGA-1	15410	5422	GA20W_d20	d20	Cortex	Week_20	scRNA_5end_R2_only	Human_Neuron	2.79972	7	7	ASCL1+ IPC
GA20W_d20_ACGATGTTCTCGATGA-1	2012	1354	GA20W_d20	d20	Cortex	Week_20	scRNA_5end_R2_only	Human_Neuron	4.30913	4	4	IN
GA20W_d20_ACGATGTTCTTGACGA-1	15210	5110	GA20W_d20	d20	Cortex	Week_20	scRNA_5end_R2_only	Human_Neuron	2.46771	7	7	ASCL1+ IPC
GA20W_d20_ACGCAGCAGATAGGAG-1	7914	3589	GA20W_d20	d20	Cortex	Week_20	scRNA_5end_R2_only	Human_Neuron	3.21719	0	0	EN
GA20W_d20_ACGCAGCAGATGTTAG-1	2597	1698	GA20W_d20	d20	Cortex	Week_20	scRNA_5end_R2_only	Human_Neuron	3.75045	0	0	EN
GA20W_d20_ACGCAGCAGCTCCTTC-1	18093	5543	GA20W_d20	d20	Cortex	Week_20	scRNA_5end_R2_only	Human_Neuron	2.37309	9	9	RG
GA20W_d20_ACGCAGCAGGCGTACA-1	7795	3401	GA20W_d20	d20	Cortex	Week_20	scRNA_5end_R2_only	Human_Neuron	0.947921	10	10	IN
GA20W_d20_ACGCAGCGTCCCTACT-1	14008	4535	GA20W_d20	d20	Cortex	Week_20	scRNA_5end_R2_only	Human_Neuron	2.1564	7	7	ASCL1+ IPC
GA20W_d20_ACGCAGCTCCACTCCA-1	7103	3136	GA20W_d20	d20	Cortex	Week_20	scRNA_5end_R2_only	Human_Neuron	3.843	10	10	IN
GA20W_d20_ACGCAGCTCTCTTATG-1	18582	5884	GA20W_d20	d20	Cortex	Week_20	scRNA_5end_R2_only	Human_Neuron	1.59803	5	5	IN_Precursor
GA20W_d20_ACGCAGCTCTTGCAAG-1	18570	5471	GA20W_d20	d20	Cortex	Week_20	scRNA_5end_R2_only	Human_Neuron	1.08574	7	7	ASCL1+ IPC
GA20W_d20_ACGCCAGAGAAACCAT-1	1567	987	GA20W_d20	d20	Cortex	Week_20	scRNA_5end_R2_only	Human_Neuron	8.981	6	6	IN
GA20W_d20_ACGCCAGAGTGACTCT-1	8771	3936	GA20W_d20	d20	Cortex	Week_20	scRNA_5end_R2_only	Human_Neuron	1.37496	1	1	EN
GA20W_d20_ACGCCAGCAAACGTGG-1	9835	3645	GA20W_d20	d20	Cortex	Week_20	scRNA_5end_R2_only	Human_Neuron	1.71211	5	5	IN_Precursor
GA20W_d20_ACGCCAGCAAGGGTCA-1	7249	3066	GA20W_d20	d20	Cortex	Week_20	scRNA_5end_R2_only	Human_Neuron	4.43144	5	5	IN_Precursor
GA20W_d20_ACGCCAGCACTTACGA-1	5653	2709	GA20W_d20	d20	Cortex	Week_20	scRNA_5end_R2_only	Human_Neuron	1.89053	4	4	IN
GA20W_d20_ACGCCAGCAGCTGGCT-1	11743	4224	GA20W_d20	d20	Cortex	Week_20	scRNA_5end_R2_only	Human_Neuron	1.80683	4	4	IN
GA20W_d20_ACGCCAGGTAGTGAAT-1	9032	3773	GA20W_d20	d20	Cortex	Week_20	scRNA_5end_R2_only	Human_Neuron	1.70621	3	3	EOMES+ IPC
GA20W_d20_ACGCCAGGTCAAGCGA-1	831	628	GA20W_d20	d20	Cortex	Week_20	scRNA_5end_R2_only	Human_Neuron	9.65092	9	9	RG
GA20W_d20_ACGCCAGGTCTCACCT-1	11106	4216	GA20W_d20	d20	Cortex	Week_20	scRNA_5end_R2_only	Human_Neuron	2.17558	10	10	IN
GA20W_d20_ACGCCAGGTGGACGAT-1	2530	1659	GA20W_d20	d20	Cortex	Week_20	scRNA_5end_R2_only	Human_Neuron	0.857143	4	4	IN
GA20W_d20_ACGCCGAAGTTTAGGA-1	11898	4591	GA20W_d20	d20	Cortex	Week_20	scRNA_5end_R2_only	Human_Neuron	2.43702	7	7	ASCL1+ IPC
GA20W_d20_ACGCCGAGTCAGGACA-1	903	678	GA20W_d20	d20	Cortex	Week_20	scRNA_5end_R2_only	Human_Neuron	12.6195	6	6	IN
GA20W_d20_ACGCCGAGTTAAGACA-1	1080	705	GA20W_d20	d20	Cortex	Week_20	scRNA_5end_R2_only	Human_Neuron	18.615	14	14	Astro
GA20W_d20_ACGCCGAGTTGATTGC-1	1467	1063	GA20W_d20	d20	Cortex	Week_20	scRNA_5end_R2_only	Human_Neuron	12.4198	15	15	Astro
GA20W_d20_ACGCCGAGTTGCGTTA-1	10045	4070	GA20W_d20	d20	Cortex	Week_20	scRNA_5end_R2_only	Human_Neuron	2.24156	4	4	IN
GA20W_d20_ACGCCGATCAACTCTT-1	9573	3907	GA20W_d20	d20	Cortex	Week_20	scRNA_5end_R2_only	Human_Neuron	1.74779	10	10	IN
GA20W_d20_ACGCCGATCGCGTAGC-1	4219	2454	GA20W_d20	d20	Cortex	Week_20	scRNA_5end_R2_only	Human_Neuron	3.18182	3	3	EOMES+ IPC
GA20W_d20_ACGCCGATCGTGGGAA-1	809	628	GA20W_d20	d20	Cortex	Week_20	scRNA_5end_R2_only	Human_Neuron	2.68378	12	12	EN
GA20W_d20_ACGGAGAAGCTGCGAA-1	11392	3833	GA20W_d20	d20	Cortex	Week_20	scRNA_5end_R2_only	Human_Neuron	0.869071	8	8	IN_Precursor
GA20W_d20_ACGGAGAAGGGTTCCC-1	11100	3950	GA20W_d20	d20	Cortex	Week_20	scRNA_5end_R2_only	Human_Neuron	2.00988	5	5	IN_Precursor
GA20W_d20_ACGGAGAAGTCGTTTG-1	7810	3375	GA20W_d20	d20	Cortex	Week_20	scRNA_5end_R2_only	Human_Neuron	1.9641	9	9	RG
GA20W_d20_ACGGAGACAATCCAAC-1	14633	4776	GA20W_d20	d20	Cortex	Week_20	scRNA_5end_R2_only	Human_Neuron	2.21446	5	5	IN_Precursor
GA20W_d20_ACGGAGACACCAGATT-1	6734	3283	GA20W_d20	d20	Cortex	Week_20	scRNA_5end_R2_only	Human_Neuron	1.78597	0	0	EN
GA20W_d20_ACGGAGACAGACGCCT-1	13691	4998	GA20W_d20	d20	Cortex	Week_20	scRNA_5end_R2_only	Human_Neuron	0.938686	1	1	EN
GA20W_d20_ACGGAGACATGGTAGG-1	12324	4703	GA20W_d20	d20	Cortex	Week_20	scRNA_5end_R2_only	Human_Neuron	1.59455	13	13	Oligo
GA20W_d20_ACGGAGACATGTTGAC-1	4250	2465	GA20W_d20	d20	Cortex	Week_20	scRNA_5end_R2_only	Human_Neuron	2.10572	2	2	IN
GA20W_d20_ACGGAGACATTTCAGG-1	4798	2582	GA20W_d20	d20	Cortex	Week_20	scRNA_5end_R2_only	Human_Neuron	1.76504	2	2	IN
GA20W_d20_ACGGAGAGTCCGTGAC-1	7435	3399	GA20W_d20	d20	Cortex	Week_20	scRNA_5end_R2_only	Human_Neuron	2.73283	2	2	IN
GA20W_d20_ACGGAGATCACGACTA-1	16719	5444	GA20W_d20	d20	Cortex	Week_20	scRNA_5end_R2_only	Human_Neuron	0.107181	11	11	EN
GA20W_d20_ACGGAGATCCGAACGC-1	699	521	GA20W_d20	d20	Cortex	Week_20	scRNA_5end_R2_only	Human_Neuron	15.5689	15	15	Astro
GA20W_d20_ACGGAGATCGGAAACG-1	966	734	GA20W_d20	d20	Cortex	Week_20	scRNA_5end_R2_only	Human_Neuron	0	6	6	IN
GA20W_d20_ACGGAGATCTGCGGCA-1	12037	4424	GA20W_d20	d20	Cortex	Week_20	scRNA_5end_R2_only	Human_Neuron	1.74529	4	4	IN
GA20W_d20_ACGGCCAAGCGATTCT-1	2238	1400	GA20W_d20	d20	Cortex	Week_20	scRNA_5end_R2_only	Human_Neuron	4.19136	4	4	IN
GA20W_d20_ACGGCCACAATCGAAA-1	2550	1599	GA20W_d20	d20	Cortex	Week_20	scRNA_5end_R2_only	Human_Neuron	10.6501	14	14	Astro
GA20W_d20_ACGGCCACACCCTATC-1	785	621	GA20W_d20	d20	Cortex	Week_20	scRNA_5end_R2_only	Human_Neuron	10.9234	6	6	IN
GA20W_d20_ACGGCCACACGGTTTA-1	9497	4193	GA20W_d20	d20	Cortex	Week_20	scRNA_5end_R2_only	Human_Neuron	0.108002	0	0	EN
GA20W_d20_ACGGCCACAGCTGCAC-1	16473	5593	GA20W_d20	d20	Cortex	Week_20	scRNA_5end_R2_only	Human_Neuron	2.06479	7	7	ASCL1+ IPC
GA20W_d20_ACGGCCACAGGCGATA-1	14309	4900	GA20W_d20	d20	Cortex	Week_20	scRNA_5end_R2_only	Human_Neuron	2.3997	5	5	IN_Precursor
GA20W_d20_ACGGCCACATCACGTA-1	3642	2308	GA20W_d20	d20	Cortex	Week_20	scRNA_5end_R2_only	Human_Neuron	0.370665	13	13	Oligo
GA20W_d20_ACGGCCAGTAGGACAC-1	23036	6345	GA20W_d20	d20	Cortex	Week_20	scRNA_5end_R2_only	Human_Neuron	2.11233	2	2	IN
GA20W_d20_ACGGGCTAGAGGTAGA-1	4021	2356	GA20W_d20	d20	Cortex	Week_20	scRNA_5end_R2_only	Human_Neuron	0.591447	4	4	IN
GA20W_d20_ACGGGCTAGATGTGGC-1	896	675	GA20W_d20	d20	Cortex	Week_20	scRNA_5end_R2_only	Human_Neuron	13.3014	6	6	IN
GA20W_d20_ACGGGCTAGTACGTTC-1	2974	1900	GA20W_d20	d20	Cortex	Week_20	scRNA_5end_R2_only	Human_Neuron	2.03634	2	2	IN
GA20W_d20_ACGGGCTCACACAGAG-1	12873	4815	GA20W_d20	d20	Cortex	Week_20	scRNA_5end_R2_only	Human_Neuron	3.25553	13	13	Oligo
GA20W_d20_ACGGGCTCACCGAATT-1	44416	8059	GA20W_d20	d20	Cortex	Week_20	scRNA_5end_R2_only	Human_Neuron	1.37694	8	8	IN_Precursor
GA20W_d20_ACGGGCTCATTAGGCT-1	8182	3644	GA20W_d20	d20	Cortex	Week_20	scRNA_5end_R2_only	Human_Neuron	0.747184	0	0	EN
GA20W_d20_ACGGGCTCATTTCAGG-1	3352	2022	GA20W_d20	d20	Cortex	Week_20	scRNA_5end_R2_only	Human_Neuron	1.47986	4	4	IN
GA20W_d20_ACGGGCTGTAAGGATT-1	10712	4296	GA20W_d20	d20	Cortex	Week_20	scRNA_5end_R2_only	Human_Neuron	1.79813	4	4	IN
GA20W_d20_ACGGGCTGTACGCTGC-1	16717	5347	GA20W_d20	d20	Cortex	Week_20	scRNA_5end_R2_only	Human_Neuron	1.10681	7	7	ASCL1+ IPC
GA20W_d20_ACGGGCTGTACTCGCG-1	3399	2151	GA20W_d20	d20	Cortex	Week_20	scRNA_5end_R2_only	Human_Neuron	0.459374	0	0	EN
GA20W_d20_ACGGGCTGTTGTCGCG-1	766	602	GA20W_d20	d20	Cortex	Week_20	scRNA_5end_R2_only	Human_Neuron	5.97561	6	6	IN
GA20W_d20_ACGGGCTGTTTGGCGC-1	5960	2852	GA20W_d20	d20	Cortex	Week_20	scRNA_5end_R2_only	Human_Neuron	1.44568	3	3	EOMES+ IPC
GA20W_d20_ACGGGCTTCCAAATGC-1	12022	4727	GA20W_d20	d20	Cortex	Week_20	scRNA_5end_R2_only	Human_Neuron	0.935081	10	10	IN
GA20W_d20_ACGGGCTTCCAGAGGA-1	15555	5056	GA20W_d20	d20	Cortex	Week_20	scRNA_5end_R2_only	Human_Neuron	1.47515	7	7	ASCL1+ IPC
GA20W_d20_ACGGGCTTCCGAGCCA-1	4086	2316	GA20W_d20	d20	Cortex	Week_20	scRNA_5end_R2_only	Human_Neuron	1.72649	2	2	IN
GA20W_d20_ACGGGCTTCGCCAGCA-1	2873	1829	GA20W_d20	d20	Cortex	Week_20	scRNA_5end_R2_only	Human_Neuron	1.90295	2	2	IN
GA20W_d20_ACGGGCTTCGTCCGTT-1	5649	3032	GA20W_d20	d20	Cortex	Week_20	scRNA_5end_R2_only	Human_Neuron	3.46342	0	0	EN
GA20W_d20_ACGGGCTTCGTGACAT-1	1724	1370	GA20W_d20	d20	Cortex	Week_20	scRNA_5end_R2_only	Human_Neuron	13.0498	7	7	ASCL1+ IPC
GA20W_d20_ACGGGCTTCTGTCAAG-1	7165	3188	GA20W_d20	d20	Cortex	Week_20	scRNA_5end_R2_only	Human_Neuron	1.62935	4	4	IN
GA20W_d20_ACGGGTCAGAGGACGG-1	6648	3325	GA20W_d20	d20	Cortex	Week_20	scRNA_5end_R2_only	Human_Neuron	0.4265	2	2	IN
GA20W_d20_ACGGGTCAGCGATGAC-1	7975	3578	GA20W_d20	d20	Cortex	Week_20	scRNA_5end_R2_only	Human_Neuron	1.5548	2	2	IN
GA20W_d20_ACGGGTCAGTAGCCGA-1	12935	4797	GA20W_d20	d20	Cortex	Week_20	scRNA_5end_R2_only	Human_Neuron	0.701879	18	18	EN
GA20W_d20_ACGGGTCAGTGATCGG-1	3290	2023	GA20W_d20	d20	Cortex	Week_20	scRNA_5end_R2_only	Human_Neuron	4.67606	14	14	Astro
GA20W_d20_ACGGGTCAGTTATCGC-1	22944	6120	GA20W_d20	d20	Cortex	Week_20	scRNA_5end_R2_only	Human_Neuron	2.21448	7	7	ASCL1+ IPC
GA20W_d20_ACGGGTCCAAGTAGTA-1	26602	7083	GA20W_d20	d20	Cortex	Week_20	scRNA_5end_R2_only	Human_Neuron	1.81623	13	13	Oligo
GA20W_d20_ACGGGTCCAGGCTCAC-1	12435	4628	GA20W_d20	d20	Cortex	Week_20	scRNA_5end_R2_only	Human_Neuron	1.69884	3	3	EOMES+ IPC
GA20W_d20_ACGGGTCGTCAACATC-1	582	415	GA20W_d20	d20	Cortex	Week_20	scRNA_5end_R2_only	Human_Neuron	12.4251	6	6	IN
GA20W_d20_ACGGGTCTCGCAAACT-1	10283	3978	GA20W_d20	d20	Cortex	Week_20	scRNA_5end_R2_only	Human_Neuron	1.57748	8	8	IN_Precursor
GA20W_d20_ACGGGTCTCTCGATGA-1	499	409	GA20W_d20	d20	Cortex	Week_20	scRNA_5end_R2_only	Human_Neuron	0	6	6	IN
GA20W_d20_ACGTCAAAGACAGACC-1	21914	6132	GA20W_d20	d20	Cortex	Week_20	scRNA_5end_R2_only	Human_Neuron	1.41102	7	7	ASCL1+ IPC
GA20W_d20_ACGTCAAAGCTAAGAT-1	9764	3905	GA20W_d20	d20	Cortex	Week_20	scRNA_5end_R2_only	Human_Neuron	3.17023	2	2	IN
GA20W_d20_ACGTCAAAGCTAGTGG-1	17896	5494	GA20W_d20	d20	Cortex	Week_20	scRNA_5end_R2_only	Human_Neuron	2.24794	5	5	IN_Precursor
GA20W_d20_ACGTCAACAATCCGAT-1	1051	814	GA20W_d20	d20	Cortex	Week_20	scRNA_5end_R2_only	Human_Neuron	11.316	12	12	EN
GA20W_d20_ACGTCAACAGTCACTA-1	6212	3121	GA20W_d20	d20	Cortex	Week_20	scRNA_5end_R2_only	Human_Neuron	2.15416	4	4	IN
GA20W_d20_ACGTCAAGTAACGCGA-1	6761	3007	GA20W_d20	d20	Cortex	Week_20	scRNA_5end_R2_only	Human_Neuron	1.93272	3	3	EOMES+ IPC
GA20W_d20_ACGTCAAGTCTAGCGC-1	9244	3832	GA20W_d20	d20	Cortex	Week_20	scRNA_5end_R2_only	Human_Neuron	3.02229	10	10	IN
GA20W_d20_ACGTCAAGTCTAGGTT-1	22011	6203	GA20W_d20	d20	Cortex	Week_20	scRNA_5end_R2_only	Human_Neuron	0.44345	11	11	EN
GA20W_d20_ACGTCAAGTCTAGTCA-1	16988	5810	GA20W_d20	d20	Cortex	Week_20	scRNA_5end_R2_only	Human_Neuron	1.33219	5	5	IN_Precursor
GA20W_d20_ACGTCAAGTGACTCAT-1	11881	4750	GA20W_d20	d20	Cortex	Week_20	scRNA_5end_R2_only	Human_Neuron	0.876037	18	18	EN
GA20W_d20_ACGTCAAGTGCTTCTC-1	503	421	GA20W_d20	d20	Cortex	Week_20	scRNA_5end_R2_only	Human_Neuron	16.3399	6	6	IN
GA20W_d20_ACGTCAAGTTGAGGTG-1	7354	3573	GA20W_d20	d20	Cortex	Week_20	scRNA_5end_R2_only	Human_Neuron	0.749157	1	1	EN
GA20W_d20_ACGTCAATCAACGCTA-1	12675	4933	GA20W_d20	d20	Cortex	Week_20	scRNA_5end_R2_only	Human_Neuron	1.81406	7	7	ASCL1+ IPC
GA20W_d20_ACGTCAATCATGTAGC-1	34868	7398	GA20W_d20	d20	Cortex	Week_20	scRNA_5end_R2_only	Human_Neuron	1.42376	2	2	IN
GA20W_d20_ACGTCAATCTGTCCGT-1	14736	5135	GA20W_d20	d20	Cortex	Week_20	scRNA_5end_R2_only	Human_Neuron	0.169056	11	11	EN
GA20W_d20_ACGTCAATCTTGCATT-1	7773	3134	GA20W_d20	d20	Cortex	Week_20	scRNA_5end_R2_only	Human_Neuron	0.978312	8	8	IN_Precursor
GA20W_d20_ACTATCTAGTGACATA-1	3579	2176	GA20W_d20	d20	Cortex	Week_20	scRNA_5end_R2_only	Human_Neuron	1.09649	0	0	EN
GA20W_d20_ACTATCTAGTGTTAGA-1	9264	3664	GA20W_d20	d20	Cortex	Week_20	scRNA_5end_R2_only	Human_Neuron	1.19843	10	10	IN
GA20W_d20_ACTATCTCACAGGCCT-1	11601	4383	GA20W_d20	d20	Cortex	Week_20	scRNA_5end_R2_only	Human_Neuron	0.515585	2	2	IN
GA20W_d20_ACTATCTCACATGTGT-1	3124	1948	GA20W_d20	d20	Cortex	Week_20	scRNA_5end_R2_only	Human_Neuron	4.27325	2	2	IN
GA20W_d20_ACTATCTCACCATCCT-1	1465	1104	GA20W_d20	d20	Cortex	Week_20	scRNA_5end_R2_only	Human_Neuron	2.31065	6	6	IN
GA20W_d20_ACTATCTCACGGTTTA-1	12638	4670	GA20W_d20	d20	Cortex	Week_20	scRNA_5end_R2_only	Human_Neuron	1.50365	10	10	IN
GA20W_d20_ACTATCTCAGCTATTG-1	5966	3010	GA20W_d20	d20	Cortex	Week_20	scRNA_5end_R2_only	Human_Neuron	1.60571	2	2	IN
GA20W_d20_ACTATCTGTACTCTCC-1	4359	2494	GA20W_d20	d20	Cortex	Week_20	scRNA_5end_R2_only	Human_Neuron	3.1723	4	4	IN
GA20W_d20_ACTATCTGTCTCCACT-1	1795	1137	GA20W_d20	d20	Cortex	Week_20	scRNA_5end_R2_only	Human_Neuron	0.0548847	12	12	EN
GA20W_d20_ACTATCTGTGACGCCT-1	11087	4436	GA20W_d20	d20	Cortex	Week_20	scRNA_5end_R2_only	Human_Neuron	3.91604	9	9	RG
GA20W_d20_ACTATCTTCAAGGCTT-1	5862	2842	GA20W_d20	d20	Cortex	Week_20	scRNA_5end_R2_only	Human_Neuron	1.63861	2	2	IN
GA20W_d20_ACTATCTTCCTACAGA-1	3954	2354	GA20W_d20	d20	Cortex	Week_20	scRNA_5end_R2_only	Human_Neuron	2.40992	2	2	IN
GA20W_d20_ACTGAACAGCGTCTAT-1	11235	4677	GA20W_d20	d20	Cortex	Week_20	scRNA_5end_R2_only	Human_Neuron	1.89244	18	18	EN
GA20W_d20_ACTGAACAGCTGTCTA-1	19279	5468	GA20W_d20	d20	Cortex	Week_20	scRNA_5end_R2_only	Human_Neuron	1.96485	8	8	IN_Precursor
GA20W_d20_ACTGAACAGGCTAGAC-1	13919	5168	GA20W_d20	d20	Cortex	Week_20	scRNA_5end_R2_only	Human_Neuron	2.49569	0	0	EN
GA20W_d20_ACTGAACAGTCTCGGC-1	8020	3796	GA20W_d20	d20	Cortex	Week_20	scRNA_5end_R2_only	Human_Neuron	0.814594	4	4	IN
GA20W_d20_ACTGAACCAATCCAAC-1	8198	3774	GA20W_d20	d20	Cortex	Week_20	scRNA_5end_R2_only	Human_Neuron	3.45042	3	3	EOMES+ IPC
GA20W_d20_ACTGAACCAGCTCCGA-1	4470	2514	GA20W_d20	d20	Cortex	Week_20	scRNA_5end_R2_only	Human_Neuron	1.7916	2	2	IN
GA20W_d20_ACTGAACCAGCTTCGG-1	5628	2722	GA20W_d20	d20	Cortex	Week_20	scRNA_5end_R2_only	Human_Neuron	0.658635	4	4	IN
GA20W_d20_ACTGAACCAGTTCATG-1	18453	5528	GA20W_d20	d20	Cortex	Week_20	scRNA_5end_R2_only	Human_Neuron	2.45321	5	5	IN_Precursor
GA20W_d20_ACTGAACGTCTAAACC-1	3138	1980	GA20W_d20	d20	Cortex	Week_20	scRNA_5end_R2_only	Human_Neuron	0.994734	4	4	IN
GA20W_d20_ACTGAACGTGAGCGAT-1	21620	5931	GA20W_d20	d20	Cortex	Week_20	scRNA_5end_R2_only	Human_Neuron	1.14422	7	7	ASCL1+ IPC
GA20W_d20_ACTGAACGTGTCCTCT-1	11794	4314	GA20W_d20	d20	Cortex	Week_20	scRNA_5end_R2_only	Human_Neuron	2.41066	5	5	IN_Precursor
GA20W_d20_ACTGAACGTTCCACTC-1	5918	3026	GA20W_d20	d20	Cortex	Week_20	scRNA_5end_R2_only	Human_Neuron	1.09821	1	1	EN
GA20W_d20_ACTGAACGTTGGAGGT-1	2306	1484	GA20W_d20	d20	Cortex	Week_20	scRNA_5end_R2_only	Human_Neuron	0.167645	2	2	IN
GA20W_d20_ACTGAGTAGCTCCTCT-1	9020	3766	GA20W_d20	d20	Cortex	Week_20	scRNA_5end_R2_only	Human_Neuron	1.20996	4	4	IN
GA20W_d20_ACTGAGTCAAGACACG-1	6364	3109	GA20W_d20	d20	Cortex	Week_20	scRNA_5end_R2_only	Human_Neuron	0.880432	3	3	EOMES+ IPC
GA20W_d20_ACTGAGTCACGCGAAA-1	25425	6516	GA20W_d20	d20	Cortex	Week_20	scRNA_5end_R2_only	Human_Neuron	2.45031	13	13	Oligo
GA20W_d20_ACTGAGTCAGTCCTTC-1	6479	3148	GA20W_d20	d20	Cortex	Week_20	scRNA_5end_R2_only	Human_Neuron	0.529555	17	17	IN
GA20W_d20_ACTGAGTGTAGCGCAA-1	1354	933	GA20W_d20	d20	Cortex	Week_20	scRNA_5end_R2_only	Human_Neuron	0.189873	16	16	RG
GA20W_d20_ACTGAGTGTCCAGTTA-1	6059	2846	GA20W_d20	d20	Cortex	Week_20	scRNA_5end_R2_only	Human_Neuron	1.71098	3	3	EOMES+ IPC
GA20W_d20_ACTGAGTTCACAACGT-1	14750	5025	GA20W_d20	d20	Cortex	Week_20	scRNA_5end_R2_only	Human_Neuron	2.47879	7	7	ASCL1+ IPC
GA20W_d20_ACTGATGAGACAGGCT-1	1197	848	GA20W_d20	d20	Cortex	Week_20	scRNA_5end_R2_only	Human_Neuron	7.81011	6	6	IN
GA20W_d20_ACTGATGAGTGTCCAT-1	3274	2055	GA20W_d20	d20	Cortex	Week_20	scRNA_5end_R2_only	Human_Neuron	2.35877	2	2	IN
GA20W_d20_ACTGATGCAGCCTTGG-1	7651	3307	GA20W_d20	d20	Cortex	Week_20	scRNA_5end_R2_only	Human_Neuron	2.04629	3	3	EOMES+ IPC
GA20W_d20_ACTGATGCATGGATGG-1	11506	4313	GA20W_d20	d20	Cortex	Week_20	scRNA_5end_R2_only	Human_Neuron	2.05195	3	3	EOMES+ IPC
GA20W_d20_ACTGATGGTGCCTGTG-1	13535	4425	GA20W_d20	d20	Cortex	Week_20	scRNA_5end_R2_only	Human_Neuron	1.49828	8	8	IN_Precursor
GA20W_d20_ACTGATGTCAGAGGTG-1	3462	2100	GA20W_d20	d20	Cortex	Week_20	scRNA_5end_R2_only	Human_Neuron	2.05301	2	2	IN
GA20W_d20_ACTGATGTCCAGATCA-1	9247	3939	GA20W_d20	d20	Cortex	Week_20	scRNA_5end_R2_only	Human_Neuron	2.84494	10	10	IN
GA20W_d20_ACTGCTCAGGCCGAAT-1	8435	3894	GA20W_d20	d20	Cortex	Week_20	scRNA_5end_R2_only	Human_Neuron	2.45652	17	17	IN
GA20W_d20_ACTGCTCAGGTCGGAT-1	10326	4143	GA20W_d20	d20	Cortex	Week_20	scRNA_5end_R2_only	Human_Neuron	1.06541	4	4	IN
GA20W_d20_ACTGCTCCAATGGATA-1	5890	2827	GA20W_d20	d20	Cortex	Week_20	scRNA_5end_R2_only	Human_Neuron	1.74148	4	4	IN
GA20W_d20_ACTGCTCCACCACGTG-1	594	486	GA20W_d20	d20	Cortex	Week_20	scRNA_5end_R2_only	Human_Neuron	8.84146	6	6	IN
GA20W_d20_ACTGCTCCATCGATGT-1	13535	4920	GA20W_d20	d20	Cortex	Week_20	scRNA_5end_R2_only	Human_Neuron	3.70183	13	13	Oligo
GA20W_d20_ACTGCTCCATGCGCAC-1	20752	5901	GA20W_d20	d20	Cortex	Week_20	scRNA_5end_R2_only	Human_Neuron	2.37115	9	9	RG
GA20W_d20_ACTGCTCCATGTCCTC-1	11768	4499	GA20W_d20	d20	Cortex	Week_20	scRNA_5end_R2_only	Human_Neuron	1.96767	9	9	RG
GA20W_d20_ACTGCTCGTAGGAGTC-1	2973	1775	GA20W_d20	d20	Cortex	Week_20	scRNA_5end_R2_only	Human_Neuron	4.00884	2	2	IN
GA20W_d20_ACTGCTCGTTCGTTGA-1	15677	5428	GA20W_d20	d20	Cortex	Week_20	scRNA_5end_R2_only	Human_Neuron	1.01727	5	5	IN_Precursor
GA20W_d20_ACTGCTCTCCTAGAAC-1	10573	4213	GA20W_d20	d20	Cortex	Week_20	scRNA_5end_R2_only	Human_Neuron	1.40881	2	2	IN
GA20W_d20_ACTGTCCCACCAGATT-1	14423	5015	GA20W_d20	d20	Cortex	Week_20	scRNA_5end_R2_only	Human_Neuron	2.80362	2	2	IN
GA20W_d20_ACTGTCCCAGATCGGA-1	6747	3141	GA20W_d20	d20	Cortex	Week_20	scRNA_5end_R2_only	Human_Neuron	1.47848	3	3	EOMES+ IPC
GA20W_d20_ACTGTCCCATCTCGCT-1	4768	2765	GA20W_d20	d20	Cortex	Week_20	scRNA_5end_R2_only	Human_Neuron	5.28084	8	8	IN_Precursor
GA20W_d20_ACTGTCCGTAATAGCA-1	4104	2419	GA20W_d20	d20	Cortex	Week_20	scRNA_5end_R2_only	Human_Neuron	1.20345	4	4	IN
GA20W_d20_ACTGTCCTCACTATTC-1	2014	1415	GA20W_d20	d20	Cortex	Week_20	scRNA_5end_R2_only	Human_Neuron	13.777	15	15	Astro
GA20W_d20_ACTGTCCTCATATCGG-1	13646	4829	GA20W_d20	d20	Cortex	Week_20	scRNA_5end_R2_only	Human_Neuron	2.27565	4	4	IN
GA20W_d20_ACTGTCCTCCAACCAA-1	14927	5439	GA20W_d20	d20	Cortex	Week_20	scRNA_5end_R2_only	Human_Neuron	2.26676	7	7	ASCL1+ IPC
GA20W_d20_ACTGTCCTCCGTAGGC-1	16098	5077	GA20W_d20	d20	Cortex	Week_20	scRNA_5end_R2_only	Human_Neuron	2.04755	9	9	RG
GA20W_d20_ACTGTCCTCGTGGGAA-1	483	392	GA20W_d20	d20	Cortex	Week_20	scRNA_5end_R2_only	Human_Neuron	18.3168	6	6	IN
GA20W_d20_ACTGTCCTCGTTGCCT-1	2774	1832	GA20W_d20	d20	Cortex	Week_20	scRNA_5end_R2_only	Human_Neuron	1.33929	4	4	IN
GA20W_d20_ACTTACTAGGGATCTG-1	14896	4819	GA20W_d20	d20	Cortex	Week_20	scRNA_5end_R2_only	Human_Neuron	1.66568	8	8	IN_Precursor
GA20W_d20_ACTTACTCAGTCGATT-1	811	538	GA20W_d20	d20	Cortex	Week_20	scRNA_5end_R2_only	Human_Neuron	18.0296	6	6	IN
GA20W_d20_ACTTACTGTAAGGGAA-1	9225	3914	GA20W_d20	d20	Cortex	Week_20	scRNA_5end_R2_only	Human_Neuron	2.52838	10	10	IN
GA20W_d20_ACTTACTGTCTGCGGT-1	8398	3736	GA20W_d20	d20	Cortex	Week_20	scRNA_5end_R2_only	Human_Neuron	1.61036	4	4	IN
GA20W_d20_ACTTACTTCAGAGGTG-1	1549	1161	GA20W_d20	d20	Cortex	Week_20	scRNA_5end_R2_only	Human_Neuron	19.1533	12	12	EN
GA20W_d20_ACTTACTTCTGCAGTA-1	4103	2247	GA20W_d20	d20	Cortex	Week_20	scRNA_5end_R2_only	Human_Neuron	4.16185	5	5	IN_Precursor
GA20W_d20_ACTTACTTCTGGGCCA-1	11994	4498	GA20W_d20	d20	Cortex	Week_20	scRNA_5end_R2_only	Human_Neuron	2.09177	9	9	RG
GA20W_d20_ACTTGTTAGATGTCGG-1	1740	1201	GA20W_d20	d20	Cortex	Week_20	scRNA_5end_R2_only	Human_Neuron	1.9564	12	12	EN
GA20W_d20_ACTTGTTAGCTAACAA-1	2030	1360	GA20W_d20	d20	Cortex	Week_20	scRNA_5end_R2_only	Human_Neuron	3.27409	4	4	IN
GA20W_d20_ACTTGTTAGGACTGGT-1	17897	6072	GA20W_d20	d20	Cortex	Week_20	scRNA_5end_R2_only	Human_Neuron	2.64462	13	13	Oligo
GA20W_d20_ACTTGTTAGTTAACGA-1	8479	3694	GA20W_d20	d20	Cortex	Week_20	scRNA_5end_R2_only	Human_Neuron	1.97679	5	5	IN_Precursor
GA20W_d20_ACTTGTTCAATGGACG-1	5966	2853	GA20W_d20	d20	Cortex	Week_20	scRNA_5end_R2_only	Human_Neuron	2.76163	2	2	IN
GA20W_d20_ACTTGTTGTAATCACC-1	12312	4726	GA20W_d20	d20	Cortex	Week_20	scRNA_5end_R2_only	Human_Neuron	0.900103	4	4	IN
GA20W_d20_ACTTGTTGTCAATGTC-1	3915	2362	GA20W_d20	d20	Cortex	Week_20	scRNA_5end_R2_only	Human_Neuron	2.93023	4	4	IN
GA20W_d20_ACTTGTTGTCTCAACA-1	5940	2841	GA20W_d20	d20	Cortex	Week_20	scRNA_5end_R2_only	Human_Neuron	2.3188	2	2	IN
GA20W_d20_ACTTTCAAGCCAACAG-1	2129	1487	GA20W_d20	d20	Cortex	Week_20	scRNA_5end_R2_only	Human_Neuron	0.268577	2	2	IN
GA20W_d20_ACTTTCAAGCGGCTTC-1	15347	5241	GA20W_d20	d20	Cortex	Week_20	scRNA_5end_R2_only	Human_Neuron	0.746141	13	13	Oligo
GA20W_d20_ACTTTCAAGCTCAACT-1	4946	2734	GA20W_d20	d20	Cortex	Week_20	scRNA_5end_R2_only	Human_Neuron	2.65583	4	4	IN
GA20W_d20_ACTTTCAAGCTGCGAA-1	2574	1537	GA20W_d20	d20	Cortex	Week_20	scRNA_5end_R2_only	Human_Neuron	16.0194	14	14	Astro
GA20W_d20_ACTTTCAAGGGCTTCC-1	4949	2541	GA20W_d20	d20	Cortex	Week_20	scRNA_5end_R2_only	Human_Neuron	11.584	2	2	IN
GA20W_d20_ACTTTCAAGGGTGTTG-1	8378	3649	GA20W_d20	d20	Cortex	Week_20	scRNA_5end_R2_only	Human_Neuron	1.88111	10	10	IN
GA20W_d20_ACTTTCACATGTTGAC-1	20961	6415	GA20W_d20	d20	Cortex	Week_20	scRNA_5end_R2_only	Human_Neuron	0.494871	18	18	EN
GA20W_d20_ACTTTCAGTCTTCGTC-1	4550	2632	GA20W_d20	d20	Cortex	Week_20	scRNA_5end_R2_only	Human_Neuron	0.835201	4	4	IN
GA20W_d20_ACTTTCATCAACACTG-1	3690	2153	GA20W_d20	d20	Cortex	Week_20	scRNA_5end_R2_only	Human_Neuron	2.66996	2	2	IN
GA20W_d20_ACTTTCATCAACGCTA-1	24950	6022	GA20W_d20	d20	Cortex	Week_20	scRNA_5end_R2_only	Human_Neuron	0.810462	5	5	IN_Precursor
GA20W_d20_ACTTTCATCCTCGCAT-1	4251	2415	GA20W_d20	d20	Cortex	Week_20	scRNA_5end_R2_only	Human_Neuron	1.41086	2	2	IN
GA20W_d20_ACTTTCATCGCAAACT-1	7545	3547	GA20W_d20	d20	Cortex	Week_20	scRNA_5end_R2_only	Human_Neuron	4.34833	2	2	IN
GA20W_d20_ACTTTCATCTACCAGA-1	25089	6875	GA20W_d20	d20	Cortex	Week_20	scRNA_5end_R2_only	Human_Neuron	2.40439	7	7	ASCL1+ IPC
GA20W_d20_AGAATAGAGCCTCGTG-1	1213	872	GA20W_d20	d20	Cortex	Week_20	scRNA_5end_R2_only	Human_Neuron	5.52571	0	0	EN
GA20W_d20_AGAATAGAGGATGCGT-1	595	484	GA20W_d20	d20	Cortex	Week_20	scRNA_5end_R2_only	Human_Neuron	4.40945	6	6	IN
GA20W_d20_AGAATAGCACCACCAG-1	11877	4419	GA20W_d20	d20	Cortex	Week_20	scRNA_5end_R2_only	Human_Neuron	1.89855	10	10	IN
GA20W_d20_AGAATAGCACGAGAGT-1	47380	8700	GA20W_d20	d20	Cortex	Week_20	scRNA_5end_R2_only	Human_Neuron	2.1477	9	9	RG
GA20W_d20_AGAATAGCAGCTTAAC-1	19527	5452	GA20W_d20	d20	Cortex	Week_20	scRNA_5end_R2_only	Human_Neuron	1.257	5	5	IN_Precursor
GA20W_d20_AGAATAGCATCAGTCA-1	2663	1683	GA20W_d20	d20	Cortex	Week_20	scRNA_5end_R2_only	Human_Neuron	1.95105	2	2	IN
GA20W_d20_AGAATAGCATGCCCGA-1	652	515	GA20W_d20	d20	Cortex	Week_20	scRNA_5end_R2_only	Human_Neuron	0.904977	6	6	IN
GA20W_d20_AGAATAGCATTCACTT-1	8381	3851	GA20W_d20	d20	Cortex	Week_20	scRNA_5end_R2_only	Human_Neuron	2.80012	13	13	Oligo
GA20W_d20_AGAATAGGTCACACGC-1	3429	2021	GA20W_d20	d20	Cortex	Week_20	scRNA_5end_R2_only	Human_Neuron	5.40908	1	1	EN
GA20W_d20_AGAATAGGTCGTCTTC-1	8854	3746	GA20W_d20	d20	Cortex	Week_20	scRNA_5end_R2_only	Human_Neuron	2.3541	2	2	IN
GA20W_d20_AGAATAGGTCTGGAGA-1	11741	4735	GA20W_d20	d20	Cortex	Week_20	scRNA_5end_R2_only	Human_Neuron	2.53243	7	7	ASCL1+ IPC
GA20W_d20_AGAATAGGTGGGTATG-1	11584	4402	GA20W_d20	d20	Cortex	Week_20	scRNA_5end_R2_only	Human_Neuron	1.01745	4	4	IN
GA20W_d20_AGAATAGTCGGCGGTT-1	5681	2802	GA20W_d20	d20	Cortex	Week_20	scRNA_5end_R2_only	Human_Neuron	2.46094	13	13	Oligo
GA20W_d20_AGAATAGTCTCTGTCG-1	15794	5588	GA20W_d20	d20	Cortex	Week_20	scRNA_5end_R2_only	Human_Neuron	2.63893	7	7	ASCL1+ IPC
GA20W_d20_AGAATAGTCTTGCAAG-1	5415	2642	GA20W_d20	d20	Cortex	Week_20	scRNA_5end_R2_only	Human_Neuron	0.871356	2	2	IN
GA20W_d20_AGACGTTAGACCGGAT-1	7726	3411	GA20W_d20	d20	Cortex	Week_20	scRNA_5end_R2_only	Human_Neuron	2.30002	2	2	IN
GA20W_d20_AGACGTTCAATCACAC-1	6541	3003	GA20W_d20	d20	Cortex	Week_20	scRNA_5end_R2_only	Human_Neuron	1.05358	2	2	IN
GA20W_d20_AGACGTTCACAAGACG-1	5476	2816	GA20W_d20	d20	Cortex	Week_20	scRNA_5end_R2_only	Human_Neuron	2.70521	9	9	RG
GA20W_d20_AGACGTTCATCTATGG-1	7361	3796	GA20W_d20	d20	Cortex	Week_20	scRNA_5end_R2_only	Human_Neuron	1.28827	13	13	Oligo
GA20W_d20_AGACGTTGTACCGAGA-1	7462	3171	GA20W_d20	d20	Cortex	Week_20	scRNA_5end_R2_only	Human_Neuron	2.12818	8	8	IN_Precursor
GA20W_d20_AGACGTTGTACGCTGC-1	674	546	GA20W_d20	d20	Cortex	Week_20	scRNA_5end_R2_only	Human_Neuron	16.9492	6	6	IN
GA20W_d20_AGAGCGAAGGAGTAGA-1	6766	3394	GA20W_d20	d20	Cortex	Week_20	scRNA_5end_R2_only	Human_Neuron	0.801548	4	4	IN
GA20W_d20_AGAGCGAGTAAACGCG-1	491	403	GA20W_d20	d20	Cortex	Week_20	scRNA_5end_R2_only	Human_Neuron	0.4	6	6	IN
GA20W_d20_AGAGCGAGTATTAGCC-1	6885	2970	GA20W_d20	d20	Cortex	Week_20	scRNA_5end_R2_only	Human_Neuron	2.11232	10	10	IN
GA20W_d20_AGAGCGAGTGTATGGG-1	1229	921	GA20W_d20	d20	Cortex	Week_20	scRNA_5end_R2_only	Human_Neuron	9.87654	12	12	EN
GA20W_d20_AGAGCGAGTTTCCACC-1	1960	1351	GA20W_d20	d20	Cortex	Week_20	scRNA_5end_R2_only	Human_Neuron	0.288462	1	1	EN
GA20W_d20_AGAGCGATCCCACTTG-1	14239	4955	GA20W_d20	d20	Cortex	Week_20	scRNA_5end_R2_only	Human_Neuron	2.13778	5	5	IN_Precursor
GA20W_d20_AGAGCGATCGCCATAA-1	4633	2260	GA20W_d20	d20	Cortex	Week_20	scRNA_5end_R2_only	Human_Neuron	2.60271	3	3	EOMES+ IPC
GA20W_d20_AGAGCGATCGCCTGTT-1	1219	914	GA20W_d20	d20	Cortex	Week_20	scRNA_5end_R2_only	Human_Neuron	3.03266	15	15	Astro
GA20W_d20_AGAGCGATCTCTGCTG-1	7022	3099	GA20W_d20	d20	Cortex	Week_20	scRNA_5end_R2_only	Human_Neuron	1.98797	5	5	IN_Precursor
GA20W_d20_AGAGCTTAGAGTCGGT-1	5227	2524	GA20W_d20	d20	Cortex	Week_20	scRNA_5end_R2_only	Human_Neuron	2.17317	3	3	EOMES+ IPC
GA20W_d20_AGAGCTTAGCGATAGC-1	8449	3894	GA20W_d20	d20	Cortex	Week_20	scRNA_5end_R2_only	Human_Neuron	0.342466	0	0	EN
GA20W_d20_AGAGCTTAGGTGCAAC-1	7388	3116	GA20W_d20	d20	Cortex	Week_20	scRNA_5end_R2_only	Human_Neuron	0.80684	10	10	IN
GA20W_d20_AGAGCTTCAATAACGA-1	16949	4810	GA20W_d20	d20	Cortex	Week_20	scRNA_5end_R2_only	Human_Neuron	0.92358	5	5	IN_Precursor
GA20W_d20_AGAGCTTCAGGGTATG-1	7674	3258	GA20W_d20	d20	Cortex	Week_20	scRNA_5end_R2_only	Human_Neuron	2.39642	3	3	EOMES+ IPC
GA20W_d20_AGAGCTTGTCGTCTTC-1	9697	3707	GA20W_d20	d20	Cortex	Week_20	scRNA_5end_R2_only	Human_Neuron	2.55424	10	10	IN
GA20W_d20_AGAGCTTGTGGTAACG-1	1664	1273	GA20W_d20	d20	Cortex	Week_20	scRNA_5end_R2_only	Human_Neuron	18.3683	15	15	Astro
GA20W_d20_AGAGCTTTCAACGAAA-1	4191	2565	GA20W_d20	d20	Cortex	Week_20	scRNA_5end_R2_only	Human_Neuron	0.758082	1	1	EN
GA20W_d20_AGAGCTTTCACAGTAC-1	13838	4353	GA20W_d20	d20	Cortex	Week_20	scRNA_5end_R2_only	Human_Neuron	1.62928	7	7	ASCL1+ IPC
GA20W_d20_AGAGCTTTCGCTTGTC-1	11063	4101	GA20W_d20	d20	Cortex	Week_20	scRNA_5end_R2_only	Human_Neuron	1.35246	5	5	IN_Precursor
GA20W_d20_AGAGCTTTCTGTGCAA-1	464	388	GA20W_d20	d20	Cortex	Week_20	scRNA_5end_R2_only	Human_Neuron	11.8613	6	6	IN
GA20W_d20_AGAGCTTTCTGTTTGT-1	10633	4417	GA20W_d20	d20	Cortex	Week_20	scRNA_5end_R2_only	Human_Neuron	0.370926	0	0	EN
GA20W_d20_AGAGTGGCAACTTGAC-1	18815	5345	GA20W_d20	d20	Cortex	Week_20	scRNA_5end_R2_only	Human_Neuron	1.06523	8	8	IN_Precursor
GA20W_d20_AGAGTGGCAATGTTGC-1	30910	7166	GA20W_d20	d20	Cortex	Week_20	scRNA_5end_R2_only	Human_Neuron	0.584795	11	11	EN
GA20W_d20_AGAGTGGCACATTAGC-1	7859	3349	GA20W_d20	d20	Cortex	Week_20	scRNA_5end_R2_only	Human_Neuron	1.82866	2	2	IN
GA20W_d20_AGAGTGGCAGACGCAA-1	11015	4361	GA20W_d20	d20	Cortex	Week_20	scRNA_5end_R2_only	Human_Neuron	0.948953	2	2	IN
GA20W_d20_AGAGTGGGTAATAGCA-1	3283	1986	GA20W_d20	d20	Cortex	Week_20	scRNA_5end_R2_only	Human_Neuron	4.61063	2	2	IN
GA20W_d20_AGAGTGGGTGTGAAAT-1	8885	3891	GA20W_d20	d20	Cortex	Week_20	scRNA_5end_R2_only	Human_Neuron	1.44969	13	13	Oligo
GA20W_d20_AGAGTGGTCACAATGC-1	6516	2931	GA20W_d20	d20	Cortex	Week_20	scRNA_5end_R2_only	Human_Neuron	3.87597	0	0	EN
GA20W_d20_AGAGTGGTCCAGATCA-1	9747	3989	GA20W_d20	d20	Cortex	Week_20	scRNA_5end_R2_only	Human_Neuron	1.48047	2	2	IN
GA20W_d20_AGAGTGGTCCGTCATC-1	7879	3205	GA20W_d20	d20	Cortex	Week_20	scRNA_5end_R2_only	Human_Neuron	0.921141	5	5	IN_Precursor
GA20W_d20_AGAGTGGTCCTGTAGA-1	748	562	GA20W_d20	d20	Cortex	Week_20	scRNA_5end_R2_only	Human_Neuron	8.54392	6	6	IN
GA20W_d20_AGATCTGAGAGACTTA-1	11733	4086	GA20W_d20	d20	Cortex	Week_20	scRNA_5end_R2_only	Human_Neuron	0.955414	5	5	IN_Precursor
GA20W_d20_AGATCTGCACGAGGTA-1	463	356	GA20W_d20	d20	Cortex	Week_20	scRNA_5end_R2_only	Human_Neuron	0	16	16	RG
GA20W_d20_AGATCTGGTGCCTGTG-1	7997	3640	GA20W_d20	d20	Cortex	Week_20	scRNA_5end_R2_only	Human_Neuron	1.69398	4	4	IN
GA20W_d20_AGATCTGTCAACGGCC-1	7081	3629	GA20W_d20	d20	Cortex	Week_20	scRNA_5end_R2_only	Human_Neuron	5.45877	11	11	EN
GA20W_d20_AGATCTGTCAGGTAAA-1	5357	2534	GA20W_d20	d20	Cortex	Week_20	scRNA_5end_R2_only	Human_Neuron	2.55606	2	2	IN
GA20W_d20_AGATCTGTCATAGCAC-1	35291	7146	GA20W_d20	d20	Cortex	Week_20	scRNA_5end_R2_only	Human_Neuron	1.36599	5	5	IN_Precursor
GA20W_d20_AGATCTGTCATGTAGC-1	8104	3354	GA20W_d20	d20	Cortex	Week_20	scRNA_5end_R2_only	Human_Neuron	1.67925	5	5	IN_Precursor
GA20W_d20_AGATCTGTCCGTCAAA-1	2024	1315	GA20W_d20	d20	Cortex	Week_20	scRNA_5end_R2_only	Human_Neuron	0.869145	14	14	Astro
GA20W_d20_AGATCTGTCTCAACTT-1	1816	1290	GA20W_d20	d20	Cortex	Week_20	scRNA_5end_R2_only	Human_Neuron	0.104221	4	4	IN
GA20W_d20_AGATCTGTCTGTCCGT-1	8480	3537	GA20W_d20	d20	Cortex	Week_20	scRNA_5end_R2_only	Human_Neuron	2.32897	4	4	IN
GA20W_d20_AGATTGCAGGCTCATT-1	6381	2759	GA20W_d20	d20	Cortex	Week_20	scRNA_5end_R2_only	Human_Neuron	1.87678	2	2	IN
GA20W_d20_AGATTGCAGTACATGA-1	14838	5237	GA20W_d20	d20	Cortex	Week_20	scRNA_5end_R2_only	Human_Neuron	2.87605	7	7	ASCL1+ IPC
GA20W_d20_AGATTGCCAGCGTTCG-1	10964	4470	GA20W_d20	d20	Cortex	Week_20	scRNA_5end_R2_only	Human_Neuron	0.229241	0	0	EN
GA20W_d20_AGATTGCCAGCTGTTA-1	674	540	GA20W_d20	d20	Cortex	Week_20	scRNA_5end_R2_only	Human_Neuron	1.66667	17	17	IN
GA20W_d20_AGATTGCCATTCCTGC-1	10469	3809	GA20W_d20	d20	Cortex	Week_20	scRNA_5end_R2_only	Human_Neuron	1.44703	5	5	IN_Precursor
GA20W_d20_AGATTGCGTAGAAAGG-1	15674	5269	GA20W_d20	d20	Cortex	Week_20	scRNA_5end_R2_only	Human_Neuron	2.53759	2	2	IN
GA20W_d20_AGATTGCGTCCAGTGC-1	15321	5231	GA20W_d20	d20	Cortex	Week_20	scRNA_5end_R2_only	Human_Neuron	1.02881	7	7	ASCL1+ IPC
GA20W_d20_AGATTGCGTTCAGCGC-1	5820	3191	GA20W_d20	d20	Cortex	Week_20	scRNA_5end_R2_only	Human_Neuron	0.796748	0	0	EN
GA20W_d20_AGATTGCTCACCAGGC-1	4408	2479	GA20W_d20	d20	Cortex	Week_20	scRNA_5end_R2_only	Human_Neuron	1.68955	9	9	RG
GA20W_d20_AGATTGCTCAGCCTAA-1	9807	3799	GA20W_d20	d20	Cortex	Week_20	scRNA_5end_R2_only	Human_Neuron	2.15064	8	8	IN_Precursor
GA20W_d20_AGATTGCTCGGATGGA-1	642	498	GA20W_d20	d20	Cortex	Week_20	scRNA_5end_R2_only	Human_Neuron	10.0968	6	6	IN
GA20W_d20_AGATTGCTCTGTTTGT-1	20997	5879	GA20W_d20	d20	Cortex	Week_20	scRNA_5end_R2_only	Human_Neuron	2.07541	8	8	IN_Precursor
GA20W_d20_AGCAGCCAGAATTCCC-1	12723	4220	GA20W_d20	d20	Cortex	Week_20	scRNA_5end_R2_only	Human_Neuron	2.3139	8	8	IN_Precursor
GA20W_d20_AGCAGCCAGCTTATCG-1	7313	3341	GA20W_d20	d20	Cortex	Week_20	scRNA_5end_R2_only	Human_Neuron	1.70973	4	4	IN
GA20W_d20_AGCAGCCCACAGCCCA-1	6112	3016	GA20W_d20	d20	Cortex	Week_20	scRNA_5end_R2_only	Human_Neuron	3.26702	1	1	EN
GA20W_d20_AGCAGCCCACTACAGT-1	1410	1043	GA20W_d20	d20	Cortex	Week_20	scRNA_5end_R2_only	Human_Neuron	13.7347	15	15	Astro
GA20W_d20_AGCAGCCCAGATGGGT-1	7957	3295	GA20W_d20	d20	Cortex	Week_20	scRNA_5end_R2_only	Human_Neuron	6.44937	11	11	EN
GA20W_d20_AGCAGCCCAGTATCTG-1	9414	3945	GA20W_d20	d20	Cortex	Week_20	scRNA_5end_R2_only	Human_Neuron	1.96642	10	10	IN
GA20W_d20_AGCAGCCGTACAGTGG-1	8680	3837	GA20W_d20	d20	Cortex	Week_20	scRNA_5end_R2_only	Human_Neuron	0.596824	0	0	EN
GA20W_d20_AGCAGCCGTACCAGTT-1	14025	4908	GA20W_d20	d20	Cortex	Week_20	scRNA_5end_R2_only	Human_Neuron	2.05392	2	2	IN
GA20W_d20_AGCAGCCGTATATGGA-1	4096	2385	GA20W_d20	d20	Cortex	Week_20	scRNA_5end_R2_only	Human_Neuron	12.0068	14	14	Astro
GA20W_d20_AGCAGCCGTTGATTCG-1	6274	3197	GA20W_d20	d20	Cortex	Week_20	scRNA_5end_R2_only	Human_Neuron	3.19875	1	1	EN
GA20W_d20_AGCAGCCTCCAAAGTC-1	3425	2061	GA20W_d20	d20	Cortex	Week_20	scRNA_5end_R2_only	Human_Neuron	1.31027	2	2	IN
GA20W_d20_AGCAGCCTCTGTGCAA-1	11817	4673	GA20W_d20	d20	Cortex	Week_20	scRNA_5end_R2_only	Human_Neuron	1.6543	4	4	IN
GA20W_d20_AGCATACAGAGCTGCA-1	4594	2609	GA20W_d20	d20	Cortex	Week_20	scRNA_5end_R2_only	Human_Neuron	1.0022	2	2	IN
GA20W_d20_AGCATACAGCCCAATT-1	11729	4203	GA20W_d20	d20	Cortex	Week_20	scRNA_5end_R2_only	Human_Neuron	1.49207	8	8	IN_Precursor
GA20W_d20_AGCATACAGCGCTTAT-1	14428	4773	GA20W_d20	d20	Cortex	Week_20	scRNA_5end_R2_only	Human_Neuron	1.39944	4	4	IN
GA20W_d20_AGCATACAGGCAAAGA-1	2571	1763	GA20W_d20	d20	Cortex	Week_20	scRNA_5end_R2_only	Human_Neuron	13.0829	12	12	EN
GA20W_d20_AGCATACAGTACGCGA-1	1515	1092	GA20W_d20	d20	Cortex	Week_20	scRNA_5end_R2_only	Human_Neuron	3.52867	12	12	EN
GA20W_d20_AGCATACAGTATGACA-1	3614	2234	GA20W_d20	d20	Cortex	Week_20	scRNA_5end_R2_only	Human_Neuron	1.21294	0	0	EN
GA20W_d20_AGCATACGTCAACATC-1	18473	5892	GA20W_d20	d20	Cortex	Week_20	scRNA_5end_R2_only	Human_Neuron	1.99416	7	7	ASCL1+ IPC
GA20W_d20_AGCATACGTCTGCGGT-1	9617	4114	GA20W_d20	d20	Cortex	Week_20	scRNA_5end_R2_only	Human_Neuron	1.97237	1	1	EN
GA20W_d20_AGCATACGTTTACTCT-1	13564	4875	GA20W_d20	d20	Cortex	Week_20	scRNA_5end_R2_only	Human_Neuron	1.62198	10	10	IN
GA20W_d20_AGCATACTCGAATGCT-1	51794	8581	GA20W_d20	d20	Cortex	Week_20	scRNA_5end_R2_only	Human_Neuron	0.769431	8	8	IN_Precursor
GA20W_d20_AGCCTAAAGACGCTTT-1	2282	1430	GA20W_d20	d20	Cortex	Week_20	scRNA_5end_R2_only	Human_Neuron	17.7537	14	14	Astro
GA20W_d20_AGCCTAAAGATAGGAG-1	1763	1239	GA20W_d20	d20	Cortex	Week_20	scRNA_5end_R2_only	Human_Neuron	3.00107	6	6	IN
GA20W_d20_AGCCTAACAAGGCTCC-1	12524	4382	GA20W_d20	d20	Cortex	Week_20	scRNA_5end_R2_only	Human_Neuron	0.670088	5	5	IN_Precursor
GA20W_d20_AGCCTAAGTAAAGGAG-1	6617	3182	GA20W_d20	d20	Cortex	Week_20	scRNA_5end_R2_only	Human_Neuron	1.61732	1	1	EN
GA20W_d20_AGCCTAAGTAGGCATG-1	7254	3356	GA20W_d20	d20	Cortex	Week_20	scRNA_5end_R2_only	Human_Neuron	2.18069	10	10	IN
GA20W_d20_AGCCTAAGTCAAGCGA-1	25969	6658	GA20W_d20	d20	Cortex	Week_20	scRNA_5end_R2_only	Human_Neuron	1.17473	4	4	IN
GA20W_d20_AGCCTAAGTCCGAATT-1	12016	4659	GA20W_d20	d20	Cortex	Week_20	scRNA_5end_R2_only	Human_Neuron	2.40041	10	10	IN
GA20W_d20_AGCCTAAGTGTGACCC-1	5908	2747	GA20W_d20	d20	Cortex	Week_20	scRNA_5end_R2_only	Human_Neuron	1.32881	2	2	IN
GA20W_d20_AGCCTAATCAAAGTAG-1	12588	4752	GA20W_d20	d20	Cortex	Week_20	scRNA_5end_R2_only	Human_Neuron	3.39381	9	9	RG
GA20W_d20_AGCCTAATCACGACTA-1	24993	6853	GA20W_d20	d20	Cortex	Week_20	scRNA_5end_R2_only	Human_Neuron	2.56806	13	13	Oligo
GA20W_d20_AGCCTAATCGCTTGTC-1	6019	3190	GA20W_d20	d20	Cortex	Week_20	scRNA_5end_R2_only	Human_Neuron	2.20183	0	0	EN
GA20W_d20_AGCGGTCAGATGCCAG-1	1395	1017	GA20W_d20	d20	Cortex	Week_20	scRNA_5end_R2_only	Human_Neuron	5.85697	6	6	IN
GA20W_d20_AGCGGTCAGGGATCTG-1	7266	3382	GA20W_d20	d20	Cortex	Week_20	scRNA_5end_R2_only	Human_Neuron	1.41191	1	1	EN
GA20W_d20_AGCGGTCAGTATTGGA-1	7360	3381	GA20W_d20	d20	Cortex	Week_20	scRNA_5end_R2_only	Human_Neuron	1.11455	0	0	EN
GA20W_d20_AGCGGTCAGTTTAGGA-1	20705	5959	GA20W_d20	d20	Cortex	Week_20	scRNA_5end_R2_only	Human_Neuron	1.38057	11	11	EN
GA20W_d20_AGCGGTCCACGAGAGT-1	15663	5213	GA20W_d20	d20	Cortex	Week_20	scRNA_5end_R2_only	Human_Neuron	1.56655	4	4	IN
GA20W_d20_AGCGGTCCATAGACTC-1	11581	4171	GA20W_d20	d20	Cortex	Week_20	scRNA_5end_R2_only	Human_Neuron	1.48891	5	5	IN_Precursor
GA20W_d20_AGCGGTCGTACTCAAC-1	9047	3870	GA20W_d20	d20	Cortex	Week_20	scRNA_5end_R2_only	Human_Neuron	3.8181	13	13	Oligo
GA20W_d20_AGCGGTCGTCTCCACT-1	6428	3207	GA20W_d20	d20	Cortex	Week_20	scRNA_5end_R2_only	Human_Neuron	1.53696	1	1	EN
GA20W_d20_AGCGGTCGTCTTGATG-1	9907	4062	GA20W_d20	d20	Cortex	Week_20	scRNA_5end_R2_only	Human_Neuron	1.1846	4	4	IN
GA20W_d20_AGCGGTCTCGAATGGG-1	2175	1409	GA20W_d20	d20	Cortex	Week_20	scRNA_5end_R2_only	Human_Neuron	14.2523	14	14	Astro
GA20W_d20_AGCGGTCTCTCAACTT-1	6154	2923	GA20W_d20	d20	Cortex	Week_20	scRNA_5end_R2_only	Human_Neuron	1.68346	3	3	EOMES+ IPC
GA20W_d20_AGCGTATAGAATAGGG-1	15460	5127	GA20W_d20	d20	Cortex	Week_20	scRNA_5end_R2_only	Human_Neuron	2.44884	5	5	IN_Precursor
GA20W_d20_AGCGTATAGTGTGGCA-1	5154	2807	GA20W_d20	d20	Cortex	Week_20	scRNA_5end_R2_only	Human_Neuron	3.93382	0	0	EN
GA20W_d20_AGCGTATCAATCCAAC-1	18057	6103	GA20W_d20	d20	Cortex	Week_20	scRNA_5end_R2_only	Human_Neuron	1.16475	17	17	IN
GA20W_d20_AGCGTATCATCGACGC-1	8618	3887	GA20W_d20	d20	Cortex	Week_20	scRNA_5end_R2_only	Human_Neuron	1.96838	13	13	Oligo
GA20W_d20_AGCGTATGTACAGACG-1	6921	3119	GA20W_d20	d20	Cortex	Week_20	scRNA_5end_R2_only	Human_Neuron	0.867379	4	4	IN
GA20W_d20_AGCGTATGTCGAACAG-1	5397	2876	GA20W_d20	d20	Cortex	Week_20	scRNA_5end_R2_only	Human_Neuron	1.15837	4	4	IN
GA20W_d20_AGCGTATGTCTTGATG-1	646	467	GA20W_d20	d20	Cortex	Week_20	scRNA_5end_R2_only	Human_Neuron	11.1413	6	6	IN
GA20W_d20_AGCGTATGTTGCGCAC-1	22478	5854	GA20W_d20	d20	Cortex	Week_20	scRNA_5end_R2_only	Human_Neuron	1.99557	9	9	RG
GA20W_d20_AGCGTATGTTTCGCTC-1	1982	1251	GA20W_d20	d20	Cortex	Week_20	scRNA_5end_R2_only	Human_Neuron	19.9921	14	14	Astro
GA20W_d20_AGCGTATTCCAGGGCT-1	4581	2538	GA20W_d20	d20	Cortex	Week_20	scRNA_5end_R2_only	Human_Neuron	0.718706	4	4	IN
GA20W_d20_AGCGTCGAGACTTGAA-1	3830	2100	GA20W_d20	d20	Cortex	Week_20	scRNA_5end_R2_only	Human_Neuron	0.0967118	0	0	EN
GA20W_d20_AGCGTCGAGGAGTTTA-1	5372	2687	GA20W_d20	d20	Cortex	Week_20	scRNA_5end_R2_only	Human_Neuron	1.82978	10	10	IN
GA20W_d20_AGCGTCGCAATCTACG-1	24217	7024	GA20W_d20	d20	Cortex	Week_20	scRNA_5end_R2_only	Human_Neuron	3.54207	11	11	EN
GA20W_d20_AGCGTCGCACCATGTA-1	11665	4200	GA20W_d20	d20	Cortex	Week_20	scRNA_5end_R2_only	Human_Neuron	1.79372	7	7	ASCL1+ IPC
GA20W_d20_AGCGTCGCATATGAGA-1	8132	3448	GA20W_d20	d20	Cortex	Week_20	scRNA_5end_R2_only	Human_Neuron	1.68256	5	5	IN_Precursor
GA20W_d20_AGCGTCGGTACCGTTA-1	7337	3009	GA20W_d20	d20	Cortex	Week_20	scRNA_5end_R2_only	Human_Neuron	2.83152	5	5	IN_Precursor
GA20W_d20_AGCGTCGGTCGTGGCT-1	3826	1996	GA20W_d20	d20	Cortex	Week_20	scRNA_5end_R2_only	Human_Neuron	1.18605	16	16	RG
GA20W_d20_AGCGTCGTCTTACCTA-1	2508	1564	GA20W_d20	d20	Cortex	Week_20	scRNA_5end_R2_only	Human_Neuron	1.06686	5	5	IN_Precursor
GA20W_d20_AGCTCCTAGGGTATCG-1	12707	4676	GA20W_d20	d20	Cortex	Week_20	scRNA_5end_R2_only	Human_Neuron	1.8301	10	10	IN
GA20W_d20_AGCTCCTAGTGGGATC-1	986	756	GA20W_d20	d20	Cortex	Week_20	scRNA_5end_R2_only	Human_Neuron	7.37628	6	6	IN
GA20W_d20_AGCTCCTAGTTGAGTA-1	12264	4575	GA20W_d20	d20	Cortex	Week_20	scRNA_5end_R2_only	Human_Neuron	1.13367	10	10	IN
GA20W_d20_AGCTCCTCACATTCGA-1	4822	2405	GA20W_d20	d20	Cortex	Week_20	scRNA_5end_R2_only	Human_Neuron	1.98056	2	2	IN
GA20W_d20_AGCTCCTGTCTAGTCA-1	4780	2565	GA20W_d20	d20	Cortex	Week_20	scRNA_5end_R2_only	Human_Neuron	0.35552	4	4	IN
GA20W_d20_AGCTCCTGTGTTTGTG-1	18047	5738	GA20W_d20	d20	Cortex	Week_20	scRNA_5end_R2_only	Human_Neuron	1.79123	13	13	Oligo
GA20W_d20_AGCTCCTTCAAGATCC-1	5878	3149	GA20W_d20	d20	Cortex	Week_20	scRNA_5end_R2_only	Human_Neuron	1.26563	1	1	EN
GA20W_d20_AGCTCCTTCCCGACTT-1	1567	1172	GA20W_d20	d20	Cortex	Week_20	scRNA_5end_R2_only	Human_Neuron	6.16921	12	12	EN
GA20W_d20_AGCTCCTTCCCTAATT-1	2148	1472	GA20W_d20	d20	Cortex	Week_20	scRNA_5end_R2_only	Human_Neuron	17.8612	12	12	EN
GA20W_d20_AGCTCCTTCTACGAGT-1	14341	4870	GA20W_d20	d20	Cortex	Week_20	scRNA_5end_R2_only	Human_Neuron	1.77909	5	5	IN_Precursor
GA20W_d20_AGCTCTCCAGGGTTAG-1	6668	3412	GA20W_d20	d20	Cortex	Week_20	scRNA_5end_R2_only	Human_Neuron	1.51324	2	2	IN
GA20W_d20_AGCTCTCCAGTACACT-1	2655	1714	GA20W_d20	d20	Cortex	Week_20	scRNA_5end_R2_only	Human_Neuron	0.361272	4	4	IN
GA20W_d20_AGCTCTCGTATTCTCT-1	8183	3703	GA20W_d20	d20	Cortex	Week_20	scRNA_5end_R2_only	Human_Neuron	2.10445	4	4	IN
GA20W_d20_AGCTCTCGTCTCTCTG-1	16635	5328	GA20W_d20	d20	Cortex	Week_20	scRNA_5end_R2_only	Human_Neuron	0.970022	8	8	IN_Precursor
GA20W_d20_AGCTCTCGTGAGGGTT-1	9772	4025	GA20W_d20	d20	Cortex	Week_20	scRNA_5end_R2_only	Human_Neuron	2.07006	0	0	EN
GA20W_d20_AGCTCTCGTTCTGTTT-1	13269	5202	GA20W_d20	d20	Cortex	Week_20	scRNA_5end_R2_only	Human_Neuron	2.15077	17	17	IN
GA20W_d20_AGCTCTCGTTTGTTTC-1	12691	4576	GA20W_d20	d20	Cortex	Week_20	scRNA_5end_R2_only	Human_Neuron	1.0319	5	5	IN_Precursor
GA20W_d20_AGCTCTCTCACAAACC-1	3830	2192	GA20W_d20	d20	Cortex	Week_20	scRNA_5end_R2_only	Human_Neuron	5.0751	2	2	IN
GA20W_d20_AGCTCTCTCACAACGT-1	11290	4451	GA20W_d20	d20	Cortex	Week_20	scRNA_5end_R2_only	Human_Neuron	2.36686	3	3	EOMES+ IPC
GA20W_d20_AGCTCTCTCCCACTTG-1	12753	4459	GA20W_d20	d20	Cortex	Week_20	scRNA_5end_R2_only	Human_Neuron	1.56217	5	5	IN_Precursor
GA20W_d20_AGCTTGAAGGGATACC-1	10852	3980	GA20W_d20	d20	Cortex	Week_20	scRNA_5end_R2_only	Human_Neuron	0.946082	5	5	IN_Precursor
GA20W_d20_AGCTTGAAGGTGATAT-1	5148	2594	GA20W_d20	d20	Cortex	Week_20	scRNA_5end_R2_only	Human_Neuron	3.89207	2	2	IN
GA20W_d20_AGCTTGACAAGTAATG-1	11870	4489	GA20W_d20	d20	Cortex	Week_20	scRNA_5end_R2_only	Human_Neuron	1.92694	10	10	IN
GA20W_d20_AGCTTGACAGGTCGTC-1	15994	4792	GA20W_d20	d20	Cortex	Week_20	scRNA_5end_R2_only	Human_Neuron	1.53099	5	5	IN_Precursor
GA20W_d20_AGCTTGACATAGGATA-1	3506	2336	GA20W_d20	d20	Cortex	Week_20	scRNA_5end_R2_only	Human_Neuron	7.96794	1	1	EN
GA20W_d20_AGCTTGACATATACGC-1	5602	2893	GA20W_d20	d20	Cortex	Week_20	scRNA_5end_R2_only	Human_Neuron	2.44131	2	2	IN
GA20W_d20_AGCTTGACATGCAATC-1	13068	4620	GA20W_d20	d20	Cortex	Week_20	scRNA_5end_R2_only	Human_Neuron	1.52123	5	5	IN_Precursor
GA20W_d20_AGCTTGAGTAAATGTG-1	8503	3542	GA20W_d20	d20	Cortex	Week_20	scRNA_5end_R2_only	Human_Neuron	2.0101	10	10	IN
GA20W_d20_AGCTTGAGTCACTTCC-1	7797	3497	GA20W_d20	d20	Cortex	Week_20	scRNA_5end_R2_only	Human_Neuron	1.55777	10	10	IN
GA20W_d20_AGCTTGATCCTCAACC-1	15431	5200	GA20W_d20	d20	Cortex	Week_20	scRNA_5end_R2_only	Human_Neuron	2.2776	7	7	ASCL1+ IPC
GA20W_d20_AGCTTGATCTCAACTT-1	7812	3442	GA20W_d20	d20	Cortex	Week_20	scRNA_5end_R2_only	Human_Neuron	1.62734	10	10	IN
GA20W_d20_AGGCCACAGAGACTTA-1	5629	3035	GA20W_d20	d20	Cortex	Week_20	scRNA_5end_R2_only	Human_Neuron	1.50311	0	0	EN
GA20W_d20_AGGCCACAGAGATGAG-1	5508	2895	GA20W_d20	d20	Cortex	Week_20	scRNA_5end_R2_only	Human_Neuron	10.5279	14	14	Astro
GA20W_d20_AGGCCACAGCGATTCT-1	5964	2789	GA20W_d20	d20	Cortex	Week_20	scRNA_5end_R2_only	Human_Neuron	2.12516	2	2	IN
GA20W_d20_AGGCCACCAAGGTTCT-1	3233	1694	GA20W_d20	d20	Cortex	Week_20	scRNA_5end_R2_only	Human_Neuron	0.36813	16	16	RG
GA20W_d20_AGGCCACCACACCGAC-1	7097	3459	GA20W_d20	d20	Cortex	Week_20	scRNA_5end_R2_only	Human_Neuron	4.20869	4	4	IN
GA20W_d20_AGGCCACCAGTCGTGC-1	2555	1742	GA20W_d20	d20	Cortex	Week_20	scRNA_5end_R2_only	Human_Neuron	13.1032	12	12	EN
GA20W_d20_AGGCCACCATTCGACA-1	4623	2377	GA20W_d20	d20	Cortex	Week_20	scRNA_5end_R2_only	Human_Neuron	1.99664	3	3	EOMES+ IPC
GA20W_d20_AGGCCACGTCAAGCGA-1	7300	3749	GA20W_d20	d20	Cortex	Week_20	scRNA_5end_R2_only	Human_Neuron	3.39299	0	0	EN
GA20W_d20_AGGCCACGTCTCTTTA-1	10308	3998	GA20W_d20	d20	Cortex	Week_20	scRNA_5end_R2_only	Human_Neuron	2.69618	4	4	IN
GA20W_d20_AGGCCACGTTCAGTAC-1	3810	2229	GA20W_d20	d20	Cortex	Week_20	scRNA_5end_R2_only	Human_Neuron	2.06946	4	4	IN
GA20W_d20_AGGCCACTCAGTTCGA-1	5042	2629	GA20W_d20	d20	Cortex	Week_20	scRNA_5end_R2_only	Human_Neuron	2.37367	2	2	IN
GA20W_d20_AGGCCACTCCGCAAGC-1	12215	4360	GA20W_d20	d20	Cortex	Week_20	scRNA_5end_R2_only	Human_Neuron	1.59886	5	5	IN_Precursor
GA20W_d20_AGGCCACTCGGCATCG-1	9949	3825	GA20W_d20	d20	Cortex	Week_20	scRNA_5end_R2_only	Human_Neuron	0.729195	5	5	IN_Precursor
GA20W_d20_AGGCCACTCGTTTGCC-1	7882	3616	GA20W_d20	d20	Cortex	Week_20	scRNA_5end_R2_only	Human_Neuron	6.46542	5	5	IN_Precursor
GA20W_d20_AGGCCGTAGATCTGCT-1	2733	1689	GA20W_d20	d20	Cortex	Week_20	scRNA_5end_R2_only	Human_Neuron	3.08599	4	4	IN
GA20W_d20_AGGCCGTAGCGTCTAT-1	4418	2612	GA20W_d20	d20	Cortex	Week_20	scRNA_5end_R2_only	Human_Neuron	4.88166	17	17	IN
GA20W_d20_AGGCCGTAGTTAACGA-1	7048	3553	GA20W_d20	d20	Cortex	Week_20	scRNA_5end_R2_only	Human_Neuron	1.44137	0	0	EN
GA20W_d20_AGGCCGTCAAGCGAGT-1	3318	2096	GA20W_d20	d20	Cortex	Week_20	scRNA_5end_R2_only	Human_Neuron	15.3943	12	12	EN
GA20W_d20_AGGCCGTCACCAGCAC-1	21623	5783	GA20W_d20	d20	Cortex	Week_20	scRNA_5end_R2_only	Human_Neuron	2.22825	5	5	IN_Precursor
GA20W_d20_AGGCCGTCACGAAATA-1	1176	801	GA20W_d20	d20	Cortex	Week_20	scRNA_5end_R2_only	Human_Neuron	17.7686	14	14	Astro
GA20W_d20_AGGCCGTCATCTCCCA-1	6831	3245	GA20W_d20	d20	Cortex	Week_20	scRNA_5end_R2_only	Human_Neuron	4.02436	5	5	IN_Precursor
GA20W_d20_AGGCCGTCATGGTAGG-1	10042	4132	GA20W_d20	d20	Cortex	Week_20	scRNA_5end_R2_only	Human_Neuron	2.39401	9	9	RG
GA20W_d20_AGGCCGTGTGATAAGT-1	17733	5557	GA20W_d20	d20	Cortex	Week_20	scRNA_5end_R2_only	Human_Neuron	1.0787	2	2	IN
GA20W_d20_AGGCCGTGTGATGTGG-1	3082	1738	GA20W_d20	d20	Cortex	Week_20	scRNA_5end_R2_only	Human_Neuron	0	16	16	RG
GA20W_d20_AGGCCGTGTGCAGACA-1	611	509	GA20W_d20	d20	Cortex	Week_20	scRNA_5end_R2_only	Human_Neuron	15.5914	6	6	IN
GA20W_d20_AGGCCGTGTGCCTTGG-1	17826	5604	GA20W_d20	d20	Cortex	Week_20	scRNA_5end_R2_only	Human_Neuron	2.14244	8	8	IN_Precursor
GA20W_d20_AGGCCGTGTGGCTCCA-1	7835	3762	GA20W_d20	d20	Cortex	Week_20	scRNA_5end_R2_only	Human_Neuron	1.82267	0	0	EN
GA20W_d20_AGGCCGTGTTCCCGAG-1	6111	3051	GA20W_d20	d20	Cortex	Week_20	scRNA_5end_R2_only	Human_Neuron	1.98908	7	7	ASCL1+ IPC
GA20W_d20_AGGCCGTGTTCGCTAA-1	2417	1689	GA20W_d20	d20	Cortex	Week_20	scRNA_5end_R2_only	Human_Neuron	0.77173	0	0	EN
GA20W_d20_AGGCCGTTCACATAGC-1	5868	2730	GA20W_d20	d20	Cortex	Week_20	scRNA_5end_R2_only	Human_Neuron	1.40454	4	4	IN
GA20W_d20_AGGCCGTTCGACCAGC-1	2565	1629	GA20W_d20	d20	Cortex	Week_20	scRNA_5end_R2_only	Human_Neuron	0.146092	4	4	IN
GA20W_d20_AGGCCGTTCTGTGCAA-1	15891	5421	GA20W_d20	d20	Cortex	Week_20	scRNA_5end_R2_only	Human_Neuron	1.24118	18	18	EN
GA20W_d20_AGGGAGTAGCCACGCT-1	18784	5676	GA20W_d20	d20	Cortex	Week_20	scRNA_5end_R2_only	Human_Neuron	1.67076	5	5	IN_Precursor
GA20W_d20_AGGGAGTAGGTGCTAG-1	12042	4428	GA20W_d20	d20	Cortex	Week_20	scRNA_5end_R2_only	Human_Neuron	2.11278	9	9	RG
GA20W_d20_AGGGAGTAGTTCGCAT-1	5581	2697	GA20W_d20	d20	Cortex	Week_20	scRNA_5end_R2_only	Human_Neuron	1.63859	4	4	IN
GA20W_d20_AGGGAGTCACTCGACG-1	3649	2154	GA20W_d20	d20	Cortex	Week_20	scRNA_5end_R2_only	Human_Neuron	0.569358	4	4	IN
GA20W_d20_AGGGAGTCAGGGAGAG-1	7671	3005	GA20W_d20	d20	Cortex	Week_20	scRNA_5end_R2_only	Human_Neuron	1.91833	5	5	IN_Precursor
GA20W_d20_AGGGAGTGTAAACGCG-1	6253	2935	GA20W_d20	d20	Cortex	Week_20	scRNA_5end_R2_only	Human_Neuron	2.59067	10	10	IN
GA20W_d20_AGGGAGTGTAGCGATG-1	7561	3585	GA20W_d20	d20	Cortex	Week_20	scRNA_5end_R2_only	Human_Neuron	0.122564	0	0	EN
GA20W_d20_AGGGAGTGTATTACCG-1	8567	3643	GA20W_d20	d20	Cortex	Week_20	scRNA_5end_R2_only	Human_Neuron	3.03379	5	5	IN_Precursor
GA20W_d20_AGGGAGTGTCGAGATG-1	1437	956	GA20W_d20	d20	Cortex	Week_20	scRNA_5end_R2_only	Human_Neuron	0	16	16	RG
GA20W_d20_AGGGAGTGTCTGCCAG-1	2198	1476	GA20W_d20	d20	Cortex	Week_20	scRNA_5end_R2_only	Human_Neuron	0.840689	2	2	IN
GA20W_d20_AGGGAGTTCGCCATAA-1	9297	3954	GA20W_d20	d20	Cortex	Week_20	scRNA_5end_R2_only	Human_Neuron	2.47871	18	18	EN
GA20W_d20_AGGGAGTTCTCCCTGA-1	22257	6236	GA20W_d20	d20	Cortex	Week_20	scRNA_5end_R2_only	Human_Neuron	2.01539	2	2	IN
GA20W_d20_AGGGATGAGACAAGCC-1	10251	3781	GA20W_d20	d20	Cortex	Week_20	scRNA_5end_R2_only	Human_Neuron	0.965752	10	10	IN
GA20W_d20_AGGGATGAGACAATAC-1	3453	2113	GA20W_d20	d20	Cortex	Week_20	scRNA_5end_R2_only	Human_Neuron	2.29333	4	4	IN
GA20W_d20_AGGGATGAGACGCAAC-1	7137	3159	GA20W_d20	d20	Cortex	Week_20	scRNA_5end_R2_only	Human_Neuron	1.73987	2	2	IN
GA20W_d20_AGGGATGCAAGACGTG-1	1964	1344	GA20W_d20	d20	Cortex	Week_20	scRNA_5end_R2_only	Human_Neuron	3.45821	4	4	IN
GA20W_d20_AGGGATGCACCAACCG-1	3470	1986	GA20W_d20	d20	Cortex	Week_20	scRNA_5end_R2_only	Human_Neuron	7.29194	14	14	Astro
GA20W_d20_AGGGATGCAGTGGAGT-1	6143	3212	GA20W_d20	d20	Cortex	Week_20	scRNA_5end_R2_only	Human_Neuron	5.75758	14	14	Astro
GA20W_d20_AGGGATGCATAGGATA-1	5118	2745	GA20W_d20	d20	Cortex	Week_20	scRNA_5end_R2_only	Human_Neuron	2.04362	2	2	IN
GA20W_d20_AGGGATGCATTGAGCT-1	593	457	GA20W_d20	d20	Cortex	Week_20	scRNA_5end_R2_only	Human_Neuron	19.1235	6	6	IN
GA20W_d20_AGGGATGGTGCGATAG-1	30930	6963	GA20W_d20	d20	Cortex	Week_20	scRNA_5end_R2_only	Human_Neuron	0.895309	11	11	EN
GA20W_d20_AGGGATGTCGTATCAG-1	20561	6184	GA20W_d20	d20	Cortex	Week_20	scRNA_5end_R2_only	Human_Neuron	2.78414	7	7	ASCL1+ IPC
GA20W_d20_AGGGTGACACTCTGTC-1	5029	2758	GA20W_d20	d20	Cortex	Week_20	scRNA_5end_R2_only	Human_Neuron	1.96981	4	4	IN
GA20W_d20_AGGGTGAGTAAATACG-1	4834	2655	GA20W_d20	d20	Cortex	Week_20	scRNA_5end_R2_only	Human_Neuron	3.50054	2	2	IN
GA20W_d20_AGGGTGAGTCGAGATG-1	10221	4108	GA20W_d20	d20	Cortex	Week_20	scRNA_5end_R2_only	Human_Neuron	2.05564	0	0	EN
GA20W_d20_AGGGTGAGTTCCGTCT-1	5893	3127	GA20W_d20	d20	Cortex	Week_20	scRNA_5end_R2_only	Human_Neuron	0.954294	17	17	IN
GA20W_d20_AGGGTGATCAACTCTT-1	11655	4555	GA20W_d20	d20	Cortex	Week_20	scRNA_5end_R2_only	Human_Neuron	2.48552	9	9	RG
GA20W_d20_AGGGTGATCACCGGGT-1	3424	2078	GA20W_d20	d20	Cortex	Week_20	scRNA_5end_R2_only	Human_Neuron	0.462963	4	4	IN
GA20W_d20_AGGTCATAGAAGGTGA-1	12285	4297	GA20W_d20	d20	Cortex	Week_20	scRNA_5end_R2_only	Human_Neuron	1.96652	5	5	IN_Precursor
GA20W_d20_AGGTCATAGAGTACAT-1	13508	4730	GA20W_d20	d20	Cortex	Week_20	scRNA_5end_R2_only	Human_Neuron	2.15258	5	5	IN_Precursor
GA20W_d20_AGGTCATAGCAGCCTC-1	3798	2300	GA20W_d20	d20	Cortex	Week_20	scRNA_5end_R2_only	Human_Neuron	0	3	3	EOMES+ IPC
GA20W_d20_AGGTCATAGCCAGTAG-1	898	649	GA20W_d20	d20	Cortex	Week_20	scRNA_5end_R2_only	Human_Neuron	10.4288	6	6	IN
GA20W_d20_AGGTCATAGGGCATGT-1	6619	3001	GA20W_d20	d20	Cortex	Week_20	scRNA_5end_R2_only	Human_Neuron	3.23755	10	10	IN
GA20W_d20_AGGTCATCACGTCAGC-1	1729	1254	GA20W_d20	d20	Cortex	Week_20	scRNA_5end_R2_only	Human_Neuron	5.44581	6	6	IN
GA20W_d20_AGGTCATCAGGCTGAA-1	15400	5248	GA20W_d20	d20	Cortex	Week_20	scRNA_5end_R2_only	Human_Neuron	0.817563	7	7	ASCL1+ IPC
GA20W_d20_AGGTCATCAGTCCTTC-1	22031	6230	GA20W_d20	d20	Cortex	Week_20	scRNA_5end_R2_only	Human_Neuron	1.41007	4	4	IN
GA20W_d20_AGGTCATCATCAGTAC-1	11892	4595	GA20W_d20	d20	Cortex	Week_20	scRNA_5end_R2_only	Human_Neuron	2.05677	4	4	IN
GA20W_d20_AGGTCATCATCGGTTA-1	3748	2245	GA20W_d20	d20	Cortex	Week_20	scRNA_5end_R2_only	Human_Neuron	2.93013	4	4	IN
GA20W_d20_AGGTCATTCTGTGCAA-1	9269	3815	GA20W_d20	d20	Cortex	Week_20	scRNA_5end_R2_only	Human_Neuron	2.33452	10	10	IN
GA20W_d20_AGGTCATTCTTAGCCC-1	798	681	GA20W_d20	d20	Cortex	Week_20	scRNA_5end_R2_only	Human_Neuron	0.967352	6	6	IN
GA20W_d20_AGGTCCGAGCGAAGGG-1	7979	3675	GA20W_d20	d20	Cortex	Week_20	scRNA_5end_R2_only	Human_Neuron	1.48321	9	9	RG
GA20W_d20_AGGTCCGAGGCCATAG-1	10769	3986	GA20W_d20	d20	Cortex	Week_20	scRNA_5end_R2_only	Human_Neuron	1.6181	10	10	IN
GA20W_d20_AGGTCCGAGTCGTACT-1	5932	3167	GA20W_d20	d20	Cortex	Week_20	scRNA_5end_R2_only	Human_Neuron	7.55369	10	10	IN
GA20W_d20_AGGTCCGAGTTCGCAT-1	1625	1175	GA20W_d20	d20	Cortex	Week_20	scRNA_5end_R2_only	Human_Neuron	4.62161	14	14	Astro
GA20W_d20_AGGTCCGCAGCCTTTC-1	15803	5292	GA20W_d20	d20	Cortex	Week_20	scRNA_5end_R2_only	Human_Neuron	1.30553	4	4	IN
GA20W_d20_AGGTCCGCAGGACCCT-1	1942	1305	GA20W_d20	d20	Cortex	Week_20	scRNA_5end_R2_only	Human_Neuron	4.83559	4	4	IN
GA20W_d20_AGGTCCGGTCAATGTC-1	5385	2876	GA20W_d20	d20	Cortex	Week_20	scRNA_5end_R2_only	Human_Neuron	1.3971	0	0	EN
GA20W_d20_AGGTCCGTCAGCATGT-1	10992	4635	GA20W_d20	d20	Cortex	Week_20	scRNA_5end_R2_only	Human_Neuron	1.87605	7	7	ASCL1+ IPC
GA20W_d20_AGGTCCGTCATCTGCC-1	13195	4357	GA20W_d20	d20	Cortex	Week_20	scRNA_5end_R2_only	Human_Neuron	1.57524	8	8	IN_Precursor
GA20W_d20_AGGTCCGTCGTTGACA-1	703	529	GA20W_d20	d20	Cortex	Week_20	scRNA_5end_R2_only	Human_Neuron	10.4403	6	6	IN
GA20W_d20_AGTAGTCAGAATCTCC-1	11810	4576	GA20W_d20	d20	Cortex	Week_20	scRNA_5end_R2_only	Human_Neuron	1.71243	5	5	IN_Precursor
GA20W_d20_AGTAGTCAGAGTACAT-1	92391	10059	GA20W_d20	d20	Cortex	Week_20	scRNA_5end_R2_only	Human_Neuron	0.623203	8	8	IN_Precursor
GA20W_d20_AGTAGTCAGCCAACAG-1	7589	3504	GA20W_d20	d20	Cortex	Week_20	scRNA_5end_R2_only	Human_Neuron	0.678168	4	4	IN
GA20W_d20_AGTAGTCAGCTGCCCA-1	24707	6348	GA20W_d20	d20	Cortex	Week_20	scRNA_5end_R2_only	Human_Neuron	1.36871	8	8	IN_Precursor
GA20W_d20_AGTAGTCCACGAAAGC-1	6783	3360	GA20W_d20	d20	Cortex	Week_20	scRNA_5end_R2_only	Human_Neuron	3.1808	0	0	EN
GA20W_d20_AGTAGTCGTAATCGTC-1	7679	3175	GA20W_d20	d20	Cortex	Week_20	scRNA_5end_R2_only	Human_Neuron	1.70064	2	2	IN
GA20W_d20_AGTAGTCGTAGCGATG-1	9682	3771	GA20W_d20	d20	Cortex	Week_20	scRNA_5end_R2_only	Human_Neuron	2.36502	5	5	IN_Precursor
GA20W_d20_AGTAGTCGTCTCTTTA-1	8475	4097	GA20W_d20	d20	Cortex	Week_20	scRNA_5end_R2_only	Human_Neuron	0.557038	17	17	IN
GA20W_d20_AGTAGTCTCACCAGGC-1	6672	3029	GA20W_d20	d20	Cortex	Week_20	scRNA_5end_R2_only	Human_Neuron	2.23077	3	3	EOMES+ IPC
GA20W_d20_AGTCTTTCACGGCCAT-1	3237	2128	GA20W_d20	d20	Cortex	Week_20	scRNA_5end_R2_only	Human_Neuron	13.181	12	12	EN
GA20W_d20_AGTCTTTCAGCCAGAA-1	7660	3440	GA20W_d20	d20	Cortex	Week_20	scRNA_5end_R2_only	Human_Neuron	3.25287	3	3	EOMES+ IPC
GA20W_d20_AGTCTTTCAGGTTTCA-1	5094	2840	GA20W_d20	d20	Cortex	Week_20	scRNA_5end_R2_only	Human_Neuron	3.65484	2	2	IN
GA20W_d20_AGTCTTTCATGCAACT-1	706	600	GA20W_d20	d20	Cortex	Week_20	scRNA_5end_R2_only	Human_Neuron	16.8998	12	12	EN
GA20W_d20_AGTCTTTCATGCTAGT-1	13640	4815	GA20W_d20	d20	Cortex	Week_20	scRNA_5end_R2_only	Human_Neuron	1.39947	7	7	ASCL1+ IPC
GA20W_d20_AGTCTTTGTACCTACA-1	8734	3611	GA20W_d20	d20	Cortex	Week_20	scRNA_5end_R2_only	Human_Neuron	2.21762	2	2	IN
GA20W_d20_AGTCTTTTCAAACAAG-1	820	653	GA20W_d20	d20	Cortex	Week_20	scRNA_5end_R2_only	Human_Neuron	1.43541	6	6	IN
GA20W_d20_AGTCTTTTCATGCATG-1	6787	2968	GA20W_d20	d20	Cortex	Week_20	scRNA_5end_R2_only	Human_Neuron	1.90476	2	2	IN
GA20W_d20_AGTCTTTTCGGACAAG-1	6835	3153	GA20W_d20	d20	Cortex	Week_20	scRNA_5end_R2_only	Human_Neuron	1.97353	13	13	Oligo
GA20W_d20_AGTCTTTTCGGATGTT-1	3968	2296	GA20W_d20	d20	Cortex	Week_20	scRNA_5end_R2_only	Human_Neuron	0.457352	4	4	IN
GA20W_d20_AGTCTTTTCTGCGGCA-1	24019	6500	GA20W_d20	d20	Cortex	Week_20	scRNA_5end_R2_only	Human_Neuron	1.26687	8	8	IN_Precursor
GA20W_d20_AGTGAGGCAAGTTCTG-1	13500	4772	GA20W_d20	d20	Cortex	Week_20	scRNA_5end_R2_only	Human_Neuron	4.1775	7	7	ASCL1+ IPC
GA20W_d20_AGTGAGGCACTGTCGG-1	12624	4693	GA20W_d20	d20	Cortex	Week_20	scRNA_5end_R2_only	Human_Neuron	1.78521	3	3	EOMES+ IPC
GA20W_d20_AGTGAGGCAGCCTTTC-1	16036	5299	GA20W_d20	d20	Cortex	Week_20	scRNA_5end_R2_only	Human_Neuron	2.4216	4	4	IN
GA20W_d20_AGTGAGGGTCCGTCAG-1	6924	2956	GA20W_d20	d20	Cortex	Week_20	scRNA_5end_R2_only	Human_Neuron	1.75596	2	2	IN
GA20W_d20_AGTGAGGGTCGCCATG-1	6613	3029	GA20W_d20	d20	Cortex	Week_20	scRNA_5end_R2_only	Human_Neuron	1.61549	4	4	IN
GA20W_d20_AGTGAGGGTTGAGGTG-1	9498	4108	GA20W_d20	d20	Cortex	Week_20	scRNA_5end_R2_only	Human_Neuron	0.293916	0	0	EN
GA20W_d20_AGTGAGGTCAGTTAGC-1	3727	2060	GA20W_d20	d20	Cortex	Week_20	scRNA_5end_R2_only	Human_Neuron	5.47344	5	5	IN_Precursor
GA20W_d20_AGTGAGGTCCCAGGTG-1	3377	2132	GA20W_d20	d20	Cortex	Week_20	scRNA_5end_R2_only	Human_Neuron	2.99401	3	3	EOMES+ IPC
GA20W_d20_AGTGGGAAGCGTCTAT-1	5988	3065	GA20W_d20	d20	Cortex	Week_20	scRNA_5end_R2_only	Human_Neuron	2.33362	13	13	Oligo
GA20W_d20_AGTGGGACACATGACT-1	16058	4994	GA20W_d20	d20	Cortex	Week_20	scRNA_5end_R2_only	Human_Neuron	1.13863	5	5	IN_Precursor
GA20W_d20_AGTGGGACAGACTCGC-1	1698	1190	GA20W_d20	d20	Cortex	Week_20	scRNA_5end_R2_only	Human_Neuron	19.4224	15	15	Astro
GA20W_d20_AGTGGGACATCGACGC-1	2172	1507	GA20W_d20	d20	Cortex	Week_20	scRNA_5end_R2_only	Human_Neuron	8.08885	13	13	Oligo
GA20W_d20_AGTGGGAGTACGCACC-1	12516	4571	GA20W_d20	d20	Cortex	Week_20	scRNA_5end_R2_only	Human_Neuron	1.28898	5	5	IN_Precursor
GA20W_d20_AGTGGGAGTCGAGATG-1	7712	3601	GA20W_d20	d20	Cortex	Week_20	scRNA_5end_R2_only	Human_Neuron	1.81151	1	1	EN
GA20W_d20_AGTGGGATCTTCAACT-1	11116	4155	GA20W_d20	d20	Cortex	Week_20	scRNA_5end_R2_only	Human_Neuron	2.34979	10	10	IN
GA20W_d20_AGTGTCAAGCGTAATA-1	9410	4056	GA20W_d20	d20	Cortex	Week_20	scRNA_5end_R2_only	Human_Neuron	0.695479	5	5	IN_Precursor
GA20W_d20_AGTGTCAAGTCGCCGT-1	10208	3939	GA20W_d20	d20	Cortex	Week_20	scRNA_5end_R2_only	Human_Neuron	2.23321	10	10	IN
GA20W_d20_AGTGTCAAGTGGTAAT-1	565	440	GA20W_d20	d20	Cortex	Week_20	scRNA_5end_R2_only	Human_Neuron	16.8345	6	6	IN
GA20W_d20_AGTGTCACACAAGACG-1	17349	5316	GA20W_d20	d20	Cortex	Week_20	scRNA_5end_R2_only	Human_Neuron	1.32309	5	5	IN_Precursor
GA20W_d20_AGTGTCAGTAGCTCCG-1	8002	3757	GA20W_d20	d20	Cortex	Week_20	scRNA_5end_R2_only	Human_Neuron	1.78908	0	0	EN
GA20W_d20_AGTGTCAGTGTCAATC-1	4571	2482	GA20W_d20	d20	Cortex	Week_20	scRNA_5end_R2_only	Human_Neuron	1.20937	2	2	IN
GA20W_d20_AGTTGGTAGATGGGTC-1	2467	1640	GA20W_d20	d20	Cortex	Week_20	scRNA_5end_R2_only	Human_Neuron	1.91706	2	2	IN
GA20W_d20_AGTTGGTAGTTGTAGA-1	11777	4559	GA20W_d20	d20	Cortex	Week_20	scRNA_5end_R2_only	Human_Neuron	2.2465	2	2	IN
GA20W_d20_AGTTGGTCAATCGGTT-1	6431	2943	GA20W_d20	d20	Cortex	Week_20	scRNA_5end_R2_only	Human_Neuron	2.8416	2	2	IN
GA20W_d20_AGTTGGTCAGGCGATA-1	7424	3556	GA20W_d20	d20	Cortex	Week_20	scRNA_5end_R2_only	Human_Neuron	0.483331	0	0	EN
GA20W_d20_AGTTGGTGTAATCACC-1	1077	870	GA20W_d20	d20	Cortex	Week_20	scRNA_5end_R2_only	Human_Neuron	14.792	12	12	EN
GA20W_d20_AGTTGGTGTAGAGCTG-1	1348	985	GA20W_d20	d20	Cortex	Week_20	scRNA_5end_R2_only	Human_Neuron	7.42001	6	6	IN
GA20W_d20_AGTTGGTGTCTTGTCC-1	4065	2272	GA20W_d20	d20	Cortex	Week_20	scRNA_5end_R2_only	Human_Neuron	1.211	3	3	EOMES+ IPC
GA20W_d20_AGTTGGTGTGCACGAA-1	6975	3346	GA20W_d20	d20	Cortex	Week_20	scRNA_5end_R2_only	Human_Neuron	2.12816	3	3	EOMES+ IPC
GA20W_d20_AGTTGGTTCAACGAAA-1	8842	3718	GA20W_d20	d20	Cortex	Week_20	scRNA_5end_R2_only	Human_Neuron	2.45801	5	5	IN_Precursor
GA20W_d20_AGTTGGTTCGTACGGC-1	19936	5484	GA20W_d20	d20	Cortex	Week_20	scRNA_5end_R2_only	Human_Neuron	1.55194	8	8	IN_Precursor
GA20W_d20_AGTTGGTTCTGTTTGT-1	4744	2521	GA20W_d20	d20	Cortex	Week_20	scRNA_5end_R2_only	Human_Neuron	1.58252	2	2	IN
GA20W_d20_ATAACGCAGCGTTCCG-1	2780	1813	GA20W_d20	d20	Cortex	Week_20	scRNA_5end_R2_only	Human_Neuron	0.78072	2	2	IN
GA20W_d20_ATAACGCAGTCATCCA-1	15334	5405	GA20W_d20	d20	Cortex	Week_20	scRNA_5end_R2_only	Human_Neuron	1.11295	7	7	ASCL1+ IPC
GA20W_d20_ATAACGCCATTCGACA-1	1318	900	GA20W_d20	d20	Cortex	Week_20	scRNA_5end_R2_only	Human_Neuron	10.9188	6	6	IN
GA20W_d20_ATAACGCGTGCGAAAC-1	6849	3159	GA20W_d20	d20	Cortex	Week_20	scRNA_5end_R2_only	Human_Neuron	0.884722	3	3	EOMES+ IPC
GA20W_d20_ATAACGCGTGTCGCTG-1	9402	3680	GA20W_d20	d20	Cortex	Week_20	scRNA_5end_R2_only	Human_Neuron	1.6703	5	5	IN_Precursor
GA20W_d20_ATAACGCTCGGAAACG-1	6967	3373	GA20W_d20	d20	Cortex	Week_20	scRNA_5end_R2_only	Human_Neuron	1.84278	2	2	IN
GA20W_d20_ATAACGCTCTGCTGTC-1	1107	774	GA20W_d20	d20	Cortex	Week_20	scRNA_5end_R2_only	Human_Neuron	0	16	16	RG
GA20W_d20_ATAAGAGAGACTTTCG-1	6738	3157	GA20W_d20	d20	Cortex	Week_20	scRNA_5end_R2_only	Human_Neuron	1.06794	3	3	EOMES+ IPC
GA20W_d20_ATAAGAGCAGTAAGAT-1	1437	1016	GA20W_d20	d20	Cortex	Week_20	scRNA_5end_R2_only	Human_Neuron	6.42372	6	6	IN
GA20W_d20_ATAAGAGCATAGTAAG-1	14456	5001	GA20W_d20	d20	Cortex	Week_20	scRNA_5end_R2_only	Human_Neuron	3.02508	10	10	IN
GA20W_d20_ATAAGAGGTACATCCA-1	14677	4966	GA20W_d20	d20	Cortex	Week_20	scRNA_5end_R2_only	Human_Neuron	3.59751	3	3	EOMES+ IPC
GA20W_d20_ATAAGAGGTACCGCTG-1	6788	3128	GA20W_d20	d20	Cortex	Week_20	scRNA_5end_R2_only	Human_Neuron	2.29618	2	2	IN
GA20W_d20_ATAAGAGGTATAATGG-1	461	383	GA20W_d20	d20	Cortex	Week_20	scRNA_5end_R2_only	Human_Neuron	9.77011	6	6	IN
GA20W_d20_ATAAGAGGTGACCAAG-1	14157	4552	GA20W_d20	d20	Cortex	Week_20	scRNA_5end_R2_only	Human_Neuron	2.515	5	5	IN_Precursor
GA20W_d20_ATAAGAGTCACCATAG-1	6156	3208	GA20W_d20	d20	Cortex	Week_20	scRNA_5end_R2_only	Human_Neuron	1.21805	0	0	EN
GA20W_d20_ATAAGAGTCCCAGGTG-1	2131	1448	GA20W_d20	d20	Cortex	Week_20	scRNA_5end_R2_only	Human_Neuron	1.7331	4	4	IN
GA20W_d20_ATAAGAGTCGGCGGTT-1	19111	5401	GA20W_d20	d20	Cortex	Week_20	scRNA_5end_R2_only	Human_Neuron	1.3302	7	7	ASCL1+ IPC
GA20W_d20_ATAAGAGTCTCGCATC-1	22202	6018	GA20W_d20	d20	Cortex	Week_20	scRNA_5end_R2_only	Human_Neuron	2.07244	9	9	RG
GA20W_d20_ATAGACCCAAGGTTCT-1	11771	4188	GA20W_d20	d20	Cortex	Week_20	scRNA_5end_R2_only	Human_Neuron	0.772618	5	5	IN_Precursor
GA20W_d20_ATAGACCCAATCCGAT-1	5399	2962	GA20W_d20	d20	Cortex	Week_20	scRNA_5end_R2_only	Human_Neuron	13.2521	12	12	EN
GA20W_d20_ATAGACCCAGGGCATA-1	10942	4074	GA20W_d20	d20	Cortex	Week_20	scRNA_5end_R2_only	Human_Neuron	1.49474	5	5	IN_Precursor
GA20W_d20_ATAGACCGTAGAGTGC-1	12193	4271	GA20W_d20	d20	Cortex	Week_20	scRNA_5end_R2_only	Human_Neuron	1.70286	5	5	IN_Precursor
GA20W_d20_ATAGACCGTCTTCAAG-1	5856	2918	GA20W_d20	d20	Cortex	Week_20	scRNA_5end_R2_only	Human_Neuron	2.60111	3	3	EOMES+ IPC
GA20W_d20_ATCACGAAGGGCACTA-1	5695	3187	GA20W_d20	d20	Cortex	Week_20	scRNA_5end_R2_only	Human_Neuron	6.74985	12	12	EN
GA20W_d20_ATCACGAAGGTGTGGT-1	13254	4671	GA20W_d20	d20	Cortex	Week_20	scRNA_5end_R2_only	Human_Neuron	2.32003	7	7	ASCL1+ IPC
GA20W_d20_ATCACGACAAACTGCT-1	13872	5092	GA20W_d20	d20	Cortex	Week_20	scRNA_5end_R2_only	Human_Neuron	0.756764	0	0	EN
GA20W_d20_ATCACGACACAGCCCA-1	4831	2652	GA20W_d20	d20	Cortex	Week_20	scRNA_5end_R2_only	Human_Neuron	8.61405	7	7	ASCL1+ IPC
GA20W_d20_ATCACGACACAGGCCT-1	9294	3821	GA20W_d20	d20	Cortex	Week_20	scRNA_5end_R2_only	Human_Neuron	2.01536	5	5	IN_Precursor
GA20W_d20_ATCACGACAGACAGGT-1	889	655	GA20W_d20	d20	Cortex	Week_20	scRNA_5end_R2_only	Human_Neuron	15.089	6	6	IN
GA20W_d20_ATCACGACAGGCGATA-1	4107	2361	GA20W_d20	d20	Cortex	Week_20	scRNA_5end_R2_only	Human_Neuron	3.38793	1	1	EN
GA20W_d20_ATCACGACATTCCTCG-1	8270	3882	GA20W_d20	d20	Cortex	Week_20	scRNA_5end_R2_only	Human_Neuron	0.645592	0	0	EN
GA20W_d20_ATCACGAGTACCAGTT-1	5174	2948	GA20W_d20	d20	Cortex	Week_20	scRNA_5end_R2_only	Human_Neuron	10.3697	14	14	Astro
GA20W_d20_ATCACGAGTAGCAAAT-1	31943	7753	GA20W_d20	d20	Cortex	Week_20	scRNA_5end_R2_only	Human_Neuron	2.31799	7	7	ASCL1+ IPC
GA20W_d20_ATCACGATCATGCAAC-1	15240	5254	GA20W_d20	d20	Cortex	Week_20	scRNA_5end_R2_only	Human_Neuron	3.28798	7	7	ASCL1+ IPC
GA20W_d20_ATCACGATCCAATGGT-1	2221	1481	GA20W_d20	d20	Cortex	Week_20	scRNA_5end_R2_only	Human_Neuron	0.262238	4	4	IN
GA20W_d20_ATCACGATCCACGACG-1	11282	4619	GA20W_d20	d20	Cortex	Week_20	scRNA_5end_R2_only	Human_Neuron	2.19136	9	9	RG
GA20W_d20_ATCACGATCGGAGCAA-1	1809	1290	GA20W_d20	d20	Cortex	Week_20	scRNA_5end_R2_only	Human_Neuron	19.8984	14	14	Astro
GA20W_d20_ATCACGATCGTGGACC-1	1007	808	GA20W_d20	d20	Cortex	Week_20	scRNA_5end_R2_only	Human_Neuron	0.195886	17	17	IN
GA20W_d20_ATCATCTAGATGTTAG-1	5779	2660	GA20W_d20	d20	Cortex	Week_20	scRNA_5end_R2_only	Human_Neuron	1.0061	2	2	IN
GA20W_d20_ATCATCTAGGGCATGT-1	1587	1145	GA20W_d20	d20	Cortex	Week_20	scRNA_5end_R2_only	Human_Neuron	16.4278	12	12	EN
GA20W_d20_ATCATCTAGTGTGAAT-1	7993	3520	GA20W_d20	d20	Cortex	Week_20	scRNA_5end_R2_only	Human_Neuron	3.07382	10	10	IN
GA20W_d20_ATCATCTCAACGCACC-1	17144	5554	GA20W_d20	d20	Cortex	Week_20	scRNA_5end_R2_only	Human_Neuron	2.42443	7	7	ASCL1+ IPC
GA20W_d20_ATCATCTCACTTGGAT-1	3113	1991	GA20W_d20	d20	Cortex	Week_20	scRNA_5end_R2_only	Human_Neuron	3.69117	0	0	EN
GA20W_d20_ATCATCTCAGACGCAA-1	9255	3887	GA20W_d20	d20	Cortex	Week_20	scRNA_5end_R2_only	Human_Neuron	1.50252	2	2	IN
GA20W_d20_ATCATCTCAGTCCTTC-1	1871	1286	GA20W_d20	d20	Cortex	Week_20	scRNA_5end_R2_only	Human_Neuron	10.6262	15	15	Astro
GA20W_d20_ATCATCTGTATGAAAC-1	13206	4613	GA20W_d20	d20	Cortex	Week_20	scRNA_5end_R2_only	Human_Neuron	1.17566	5	5	IN_Precursor
GA20W_d20_ATCATCTGTCCAGTAT-1	28356	6866	GA20W_d20	d20	Cortex	Week_20	scRNA_5end_R2_only	Human_Neuron	2.37644	2	2	IN
GA20W_d20_ATCATCTGTGGTCCGT-1	12451	4563	GA20W_d20	d20	Cortex	Week_20	scRNA_5end_R2_only	Human_Neuron	2.78743	7	7	ASCL1+ IPC
GA20W_d20_ATCATCTGTTGTGGCC-1	1015	777	GA20W_d20	d20	Cortex	Week_20	scRNA_5end_R2_only	Human_Neuron	7.28597	6	6	IN
GA20W_d20_ATCATCTTCAAGGCTT-1	12448	4909	GA20W_d20	d20	Cortex	Week_20	scRNA_5end_R2_only	Human_Neuron	4.43211	18	18	EN
GA20W_d20_ATCATCTTCACCGGGT-1	17576	5664	GA20W_d20	d20	Cortex	Week_20	scRNA_5end_R2_only	Human_Neuron	1.59931	2	2	IN
GA20W_d20_ATCATCTTCATTCACT-1	4949	2626	GA20W_d20	d20	Cortex	Week_20	scRNA_5end_R2_only	Human_Neuron	1.96188	4	4	IN
GA20W_d20_ATCATCTTCCCGACTT-1	3271	2010	GA20W_d20	d20	Cortex	Week_20	scRNA_5end_R2_only	Human_Neuron	1.78167	2	2	IN
GA20W_d20_ATCATGGCACGTTGGC-1	10543	4183	GA20W_d20	d20	Cortex	Week_20	scRNA_5end_R2_only	Human_Neuron	0.847606	5	5	IN_Precursor
GA20W_d20_ATCATGGGTACGCACC-1	15020	4770	GA20W_d20	d20	Cortex	Week_20	scRNA_5end_R2_only	Human_Neuron	2.22662	5	5	IN_Precursor
GA20W_d20_ATCATGGGTCAAACTC-1	3582	2309	GA20W_d20	d20	Cortex	Week_20	scRNA_5end_R2_only	Human_Neuron	15.2451	14	14	Astro
GA20W_d20_ATCATGGGTTTGGCGC-1	7851	3728	GA20W_d20	d20	Cortex	Week_20	scRNA_5end_R2_only	Human_Neuron	2.6085	1	1	EN
GA20W_d20_ATCATGGTCGCCTGTT-1	8280	3643	GA20W_d20	d20	Cortex	Week_20	scRNA_5end_R2_only	Human_Neuron	1.96325	4	4	IN
GA20W_d20_ATCATGGTCTACGAGT-1	8244	4025	GA20W_d20	d20	Cortex	Week_20	scRNA_5end_R2_only	Human_Neuron	2.98892	0	0	EN
GA20W_d20_ATCATGGTCTGCGACG-1	9737	3978	GA20W_d20	d20	Cortex	Week_20	scRNA_5end_R2_only	Human_Neuron	2.18747	4	4	IN
GA20W_d20_ATCCACCAGACCTTTG-1	8853	3804	GA20W_d20	d20	Cortex	Week_20	scRNA_5end_R2_only	Human_Neuron	1.61895	4	4	IN
GA20W_d20_ATCCACCAGCCGCCTA-1	14714	4964	GA20W_d20	d20	Cortex	Week_20	scRNA_5end_R2_only	Human_Neuron	1.34204	8	8	IN_Precursor
GA20W_d20_ATCCACCAGCGTTCCG-1	5522	2855	GA20W_d20	d20	Cortex	Week_20	scRNA_5end_R2_only	Human_Neuron	2.3435	1	1	EN
GA20W_d20_ATCCACCAGCTCTCGG-1	3182	1922	GA20W_d20	d20	Cortex	Week_20	scRNA_5end_R2_only	Human_Neuron	3.10428	2	2	IN
GA20W_d20_ATCCACCCATTTGCCC-1	1036	804	GA20W_d20	d20	Cortex	Week_20	scRNA_5end_R2_only	Human_Neuron	8.34065	6	6	IN
GA20W_d20_ATCCACCGTCTAGAGG-1	23205	6877	GA20W_d20	d20	Cortex	Week_20	scRNA_5end_R2_only	Human_Neuron	0.393475	11	11	EN
GA20W_d20_ATCCACCGTCTCTCTG-1	9511	4375	GA20W_d20	d20	Cortex	Week_20	scRNA_5end_R2_only	Human_Neuron	1.05862	0	0	EN
GA20W_d20_ATCCACCGTTCCCGAG-1	26123	6660	GA20W_d20	d20	Cortex	Week_20	scRNA_5end_R2_only	Human_Neuron	1.38722	5	5	IN_Precursor
GA20W_d20_ATCCACCTCCCGACTT-1	3508	2090	GA20W_d20	d20	Cortex	Week_20	scRNA_5end_R2_only	Human_Neuron	0.969883	2	2	IN
GA20W_d20_ATCCACCTCGAATCCA-1	3420	2047	GA20W_d20	d20	Cortex	Week_20	scRNA_5end_R2_only	Human_Neuron	0.243178	4	4	IN
GA20W_d20_ATCCACCTCGGAAATA-1	21434	5597	GA20W_d20	d20	Cortex	Week_20	scRNA_5end_R2_only	Human_Neuron	1.25815	8	8	IN_Precursor
GA20W_d20_ATCCGAAAGGGTATCG-1	6460	3168	GA20W_d20	d20	Cortex	Week_20	scRNA_5end_R2_only	Human_Neuron	1.65699	4	4	IN
GA20W_d20_ATCCGAAAGTACGACG-1	5822	2800	GA20W_d20	d20	Cortex	Week_20	scRNA_5end_R2_only	Human_Neuron	2.33338	2	2	IN
GA20W_d20_ATCCGAACAACACCCG-1	12577	4869	GA20W_d20	d20	Cortex	Week_20	scRNA_5end_R2_only	Human_Neuron	5.90618	7	7	ASCL1+ IPC
GA20W_d20_ATCCGAACAATAGCGG-1	505	416	GA20W_d20	d20	Cortex	Week_20	scRNA_5end_R2_only	Human_Neuron	1.7341	6	6	IN
GA20W_d20_ATCCGAACATAGAAAC-1	2407	1663	GA20W_d20	d20	Cortex	Week_20	scRNA_5end_R2_only	Human_Neuron	14.4561	12	12	EN
GA20W_d20_ATCCGAACATGTAAGA-1	5413	2577	GA20W_d20	d20	Cortex	Week_20	scRNA_5end_R2_only	Human_Neuron	2.72195	2	2	IN
GA20W_d20_ATCCGAAGTGTGTGCC-1	1255	974	GA20W_d20	d20	Cortex	Week_20	scRNA_5end_R2_only	Human_Neuron	3.21593	15	15	Astro
GA20W_d20_ATCCGAATCCGAGCCA-1	10977	4211	GA20W_d20	d20	Cortex	Week_20	scRNA_5end_R2_only	Human_Neuron	2.93318	9	9	RG
GA20W_d20_ATCCGAATCGACGGAA-1	1279	898	GA20W_d20	d20	Cortex	Week_20	scRNA_5end_R2_only	Human_Neuron	18.0738	6	6	IN
GA20W_d20_ATCCGAATCTCGTATT-1	7620	3648	GA20W_d20	d20	Cortex	Week_20	scRNA_5end_R2_only	Human_Neuron	1.00777	4	4	IN
GA20W_d20_ATCCGAATCTTGAGAC-1	996	801	GA20W_d20	d20	Cortex	Week_20	scRNA_5end_R2_only	Human_Neuron	10.9444	15	15	Astro
GA20W_d20_ATCGAGTAGACTAGAT-1	7633	3428	GA20W_d20	d20	Cortex	Week_20	scRNA_5end_R2_only	Human_Neuron	3.1425	2	2	IN
GA20W_d20_ATCGAGTCATAGGATA-1	6265	3061	GA20W_d20	d20	Cortex	Week_20	scRNA_5end_R2_only	Human_Neuron	2.81847	2	2	IN
GA20W_d20_ATCGAGTGTAAAGTCA-1	15536	5003	GA20W_d20	d20	Cortex	Week_20	scRNA_5end_R2_only	Human_Neuron	1.81618	8	8	IN_Precursor
GA20W_d20_ATCGAGTGTACCGAGA-1	8641	3472	GA20W_d20	d20	Cortex	Week_20	scRNA_5end_R2_only	Human_Neuron	1.28179	4	4	IN
GA20W_d20_ATCGAGTGTCGTTGTA-1	7149	3028	GA20W_d20	d20	Cortex	Week_20	scRNA_5end_R2_only	Human_Neuron	2.0426	5	5	IN_Precursor
GA20W_d20_ATCGAGTGTTATGTGC-1	3232	2032	GA20W_d20	d20	Cortex	Week_20	scRNA_5end_R2_only	Human_Neuron	15.2807	14	14	Astro
GA20W_d20_ATCGAGTTCCGTCATC-1	6738	3135	GA20W_d20	d20	Cortex	Week_20	scRNA_5end_R2_only	Human_Neuron	2.36893	4	4	IN
GA20W_d20_ATCGAGTTCGTACGGC-1	2720	1823	GA20W_d20	d20	Cortex	Week_20	scRNA_5end_R2_only	Human_Neuron	1.25448	0	0	EN
GA20W_d20_ATCTACTAGACACTAA-1	10625	4244	GA20W_d20	d20	Cortex	Week_20	scRNA_5end_R2_only	Human_Neuron	3.24866	10	10	IN
GA20W_d20_ATCTACTAGCAAATCA-1	5971	3099	GA20W_d20	d20	Cortex	Week_20	scRNA_5end_R2_only	Human_Neuron	2.63355	4	4	IN
GA20W_d20_ATCTACTAGCGCTCCA-1	16217	5344	GA20W_d20	d20	Cortex	Week_20	scRNA_5end_R2_only	Human_Neuron	2.6742	13	13	Oligo
GA20W_d20_ATCTACTAGGGTTTCT-1	3962	2370	GA20W_d20	d20	Cortex	Week_20	scRNA_5end_R2_only	Human_Neuron	1.61972	2	2	IN
GA20W_d20_ATCTACTCAAAGGTGC-1	22883	6310	GA20W_d20	d20	Cortex	Week_20	scRNA_5end_R2_only	Human_Neuron	1.50661	8	8	IN_Precursor
GA20W_d20_ATCTACTCAAGAAGAG-1	7242	3188	GA20W_d20	d20	Cortex	Week_20	scRNA_5end_R2_only	Human_Neuron	0.986637	4	4	IN
GA20W_d20_ATCTACTCACCAGTTA-1	6221	2878	GA20W_d20	d20	Cortex	Week_20	scRNA_5end_R2_only	Human_Neuron	4.05014	2	2	IN
GA20W_d20_ATCTACTCACGGCTAC-1	5613	2652	GA20W_d20	d20	Cortex	Week_20	scRNA_5end_R2_only	Human_Neuron	2.10219	2	2	IN
GA20W_d20_ATCTACTCATGCAATC-1	6512	3036	GA20W_d20	d20	Cortex	Week_20	scRNA_5end_R2_only	Human_Neuron	3.66465	3	3	EOMES+ IPC
GA20W_d20_ATCTACTGTACACCGC-1	11607	4597	GA20W_d20	d20	Cortex	Week_20	scRNA_5end_R2_only	Human_Neuron	1.25869	2	2	IN
GA20W_d20_ATCTACTGTACATGTC-1	3050	1990	GA20W_d20	d20	Cortex	Week_20	scRNA_5end_R2_only	Human_Neuron	2.3036	4	4	IN
GA20W_d20_ATCTACTGTCGTCTTC-1	19426	5811	GA20W_d20	d20	Cortex	Week_20	scRNA_5end_R2_only	Human_Neuron	1.56905	7	7	ASCL1+ IPC
GA20W_d20_ATCTACTGTTTGACAC-1	9054	4024	GA20W_d20	d20	Cortex	Week_20	scRNA_5end_R2_only	Human_Neuron	2.50178	1	1	EN
GA20W_d20_ATCTGCCAGAGTCTGG-1	3296	2064	GA20W_d20	d20	Cortex	Week_20	scRNA_5end_R2_only	Human_Neuron	1.05147	4	4	IN
GA20W_d20_ATCTGCCAGCCACCTG-1	982	745	GA20W_d20	d20	Cortex	Week_20	scRNA_5end_R2_only	Human_Neuron	4.84171	6	6	IN
GA20W_d20_ATCTGCCAGTGGGATC-1	3391	2011	GA20W_d20	d20	Cortex	Week_20	scRNA_5end_R2_only	Human_Neuron	1.94332	4	4	IN
GA20W_d20_ATCTGCCCAAGCCTAT-1	23842	6454	GA20W_d20	d20	Cortex	Week_20	scRNA_5end_R2_only	Human_Neuron	1.78665	4	4	IN
GA20W_d20_ATCTGCCCACATCTTT-1	2921	1937	GA20W_d20	d20	Cortex	Week_20	scRNA_5end_R2_only	Human_Neuron	2.32114	4	4	IN
GA20W_d20_ATCTGCCCAGGCGATA-1	3965	2357	GA20W_d20	d20	Cortex	Week_20	scRNA_5end_R2_only	Human_Neuron	0.625301	1	1	EN
GA20W_d20_ATCTGCCGTCAGGACA-1	5689	3083	GA20W_d20	d20	Cortex	Week_20	scRNA_5end_R2_only	Human_Neuron	0.276339	1	1	EN
GA20W_d20_ATCTGCCGTCCAACTA-1	14970	5139	GA20W_d20	d20	Cortex	Week_20	scRNA_5end_R2_only	Human_Neuron	0.829327	10	10	IN
GA20W_d20_ATCTGCCGTCTGATTG-1	22620	6623	GA20W_d20	d20	Cortex	Week_20	scRNA_5end_R2_only	Human_Neuron	1.43565	7	7	ASCL1+ IPC
GA20W_d20_ATCTGCCGTGTCAATC-1	2376	1594	GA20W_d20	d20	Cortex	Week_20	scRNA_5end_R2_only	Human_Neuron	0.706714	4	4	IN
GA20W_d20_ATCTGCCGTGTCGCTG-1	25722	6775	GA20W_d20	d20	Cortex	Week_20	scRNA_5end_R2_only	Human_Neuron	0.937653	4	4	IN
GA20W_d20_ATCTGCCGTGTGACCC-1	6333	3142	GA20W_d20	d20	Cortex	Week_20	scRNA_5end_R2_only	Human_Neuron	2.15432	0	0	EN
GA20W_d20_ATCTGCCGTTAAGACA-1	12130	4522	GA20W_d20	d20	Cortex	Week_20	scRNA_5end_R2_only	Human_Neuron	1.72286	2	2	IN
GA20W_d20_ATCTGCCTCAGAGGTG-1	12704	4467	GA20W_d20	d20	Cortex	Week_20	scRNA_5end_R2_only	Human_Neuron	1.16706	5	5	IN_Precursor
GA20W_d20_ATCTGCCTCCGCGCAA-1	27059	6755	GA20W_d20	d20	Cortex	Week_20	scRNA_5end_R2_only	Human_Neuron	1.93679	4	4	IN
GA20W_d20_ATGAGGGAGACCTAGG-1	20458	6000	GA20W_d20	d20	Cortex	Week_20	scRNA_5end_R2_only	Human_Neuron	2.80618	9	9	RG
GA20W_d20_ATGAGGGAGCTAGTTC-1	10877	4395	GA20W_d20	d20	Cortex	Week_20	scRNA_5end_R2_only	Human_Neuron	1.32122	1	1	EN
GA20W_d20_ATGAGGGAGTGAACAT-1	20113	5831	GA20W_d20	d20	Cortex	Week_20	scRNA_5end_R2_only	Human_Neuron	1.32424	5	5	IN_Precursor
GA20W_d20_ATGAGGGCAACGATGG-1	5623	2704	GA20W_d20	d20	Cortex	Week_20	scRNA_5end_R2_only	Human_Neuron	1.82222	4	4	IN
GA20W_d20_ATGAGGGCACGAGAGT-1	6736	3160	GA20W_d20	d20	Cortex	Week_20	scRNA_5end_R2_only	Human_Neuron	4.85725	2	2	IN
GA20W_d20_ATGAGGGGTAGGCATG-1	18764	5308	GA20W_d20	d20	Cortex	Week_20	scRNA_5end_R2_only	Human_Neuron	1.72373	8	8	IN_Precursor
GA20W_d20_ATGAGGGGTCGAGTTT-1	3502	2125	GA20W_d20	d20	Cortex	Week_20	scRNA_5end_R2_only	Human_Neuron	0.568035	2	2	IN
GA20W_d20_ATGAGGGGTGATGTGG-1	1733	1215	GA20W_d20	d20	Cortex	Week_20	scRNA_5end_R2_only	Human_Neuron	0	4	4	IN
GA20W_d20_ATGAGGGGTTGCGCAC-1	6708	3389	GA20W_d20	d20	Cortex	Week_20	scRNA_5end_R2_only	Human_Neuron	1.77675	1	1	EN
GA20W_d20_ATGAGGGTCCATGAAC-1	2755	1808	GA20W_d20	d20	Cortex	Week_20	scRNA_5end_R2_only	Human_Neuron	0.732473	4	4	IN
GA20W_d20_ATGAGGGTCCTCAACC-1	9118	3535	GA20W_d20	d20	Cortex	Week_20	scRNA_5end_R2_only	Human_Neuron	1.88772	5	5	IN_Precursor
GA20W_d20_ATGAGGGTCGGCATCG-1	9436	3542	GA20W_d20	d20	Cortex	Week_20	scRNA_5end_R2_only	Human_Neuron	1.07948	5	5	IN_Precursor
GA20W_d20_ATGAGGGTCTAACGGT-1	8400	3610	GA20W_d20	d20	Cortex	Week_20	scRNA_5end_R2_only	Human_Neuron	1.7261	2	2	IN
GA20W_d20_ATGAGGGTCTCATTCA-1	5241	2727	GA20W_d20	d20	Cortex	Week_20	scRNA_5end_R2_only	Human_Neuron	1.1634	2	2	IN
GA20W_d20_ATGCGATAGCTGCCCA-1	1955	1335	GA20W_d20	d20	Cortex	Week_20	scRNA_5end_R2_only	Human_Neuron	0	4	4	IN
GA20W_d20_ATGCGATAGCTTCGCG-1	4492	2636	GA20W_d20	d20	Cortex	Week_20	scRNA_5end_R2_only	Human_Neuron	0.475676	0	0	EN
GA20W_d20_ATGCGATAGTCAATAG-1	1049	862	GA20W_d20	d20	Cortex	Week_20	scRNA_5end_R2_only	Human_Neuron	10.394	17	17	IN
GA20W_d20_ATGCGATCAACGATCT-1	24236	6275	GA20W_d20	d20	Cortex	Week_20	scRNA_5end_R2_only	Human_Neuron	1.16576	7	7	ASCL1+ IPC
GA20W_d20_ATGCGATCACAAGTAA-1	530	461	GA20W_d20	d20	Cortex	Week_20	scRNA_5end_R2_only	Human_Neuron	0.185185	6	6	IN
GA20W_d20_ATGCGATCACCCATGG-1	5818	3129	GA20W_d20	d20	Cortex	Week_20	scRNA_5end_R2_only	Human_Neuron	0.580119	17	17	IN
GA20W_d20_ATGCGATCATATGCTG-1	16243	5057	GA20W_d20	d20	Cortex	Week_20	scRNA_5end_R2_only	Human_Neuron	2.19805	5	5	IN_Precursor
GA20W_d20_ATGCGATCATCGATGT-1	4361	2501	GA20W_d20	d20	Cortex	Week_20	scRNA_5end_R2_only	Human_Neuron	1.09497	2	2	IN
GA20W_d20_ATGCGATGTAGGCATG-1	15722	5069	GA20W_d20	d20	Cortex	Week_20	scRNA_5end_R2_only	Human_Neuron	1.51289	7	7	ASCL1+ IPC
GA20W_d20_ATGCGATGTGCACGAA-1	6019	2884	GA20W_d20	d20	Cortex	Week_20	scRNA_5end_R2_only	Human_Neuron	1.1174	2	2	IN
GA20W_d20_ATGCGATTCCGCGGTA-1	9094	3677	GA20W_d20	d20	Cortex	Week_20	scRNA_5end_R2_only	Human_Neuron	1.6074	3	3	EOMES+ IPC
GA20W_d20_ATGGGAGAGAGGACGG-1	2488	1564	GA20W_d20	d20	Cortex	Week_20	scRNA_5end_R2_only	Human_Neuron	4.4843	4	4	IN
GA20W_d20_ATGGGAGAGTCATGCT-1	10773	4124	GA20W_d20	d20	Cortex	Week_20	scRNA_5end_R2_only	Human_Neuron	1.24453	5	5	IN_Precursor
GA20W_d20_ATGGGAGCAAGGACTG-1	14170	4973	GA20W_d20	d20	Cortex	Week_20	scRNA_5end_R2_only	Human_Neuron	2.63873	7	7	ASCL1+ IPC
GA20W_d20_ATGGGAGCACAGCGTC-1	12272	4530	GA20W_d20	d20	Cortex	Week_20	scRNA_5end_R2_only	Human_Neuron	0.887151	5	5	IN_Precursor
GA20W_d20_ATGGGAGGTCGCCATG-1	5508	2917	GA20W_d20	d20	Cortex	Week_20	scRNA_5end_R2_only	Human_Neuron	1.03093	17	17	IN
GA20W_d20_ATGGGAGGTCTGATTG-1	11976	4314	GA20W_d20	d20	Cortex	Week_20	scRNA_5end_R2_only	Human_Neuron	1.19973	5	5	IN_Precursor
GA20W_d20_ATGGGAGGTGATAAAC-1	8719	3857	GA20W_d20	d20	Cortex	Week_20	scRNA_5end_R2_only	Human_Neuron	2.8214	3	3	EOMES+ IPC
GA20W_d20_ATGGGAGGTTCTGAAC-1	4291	2335	GA20W_d20	d20	Cortex	Week_20	scRNA_5end_R2_only	Human_Neuron	0.749688	2	2	IN
GA20W_d20_ATGGGAGTCACGGTTA-1	26179	6783	GA20W_d20	d20	Cortex	Week_20	scRNA_5end_R2_only	Human_Neuron	1.84639	13	13	Oligo
GA20W_d20_ATGGGAGTCATAGCAC-1	9991	4177	GA20W_d20	d20	Cortex	Week_20	scRNA_5end_R2_only	Human_Neuron	0.337553	0	0	EN
GA20W_d20_ATGTGTGAGAATTCCC-1	7998	3755	GA20W_d20	d20	Cortex	Week_20	scRNA_5end_R2_only	Human_Neuron	0.581395	1	1	EN
GA20W_d20_ATGTGTGAGATATGGT-1	4281	2465	GA20W_d20	d20	Cortex	Week_20	scRNA_5end_R2_only	Human_Neuron	2.44571	4	4	IN
GA20W_d20_ATGTGTGAGCCACTAT-1	14504	4535	GA20W_d20	d20	Cortex	Week_20	scRNA_5end_R2_only	Human_Neuron	1.13629	8	8	IN_Precursor
GA20W_d20_ATGTGTGAGTGGACGT-1	31704	7309	GA20W_d20	d20	Cortex	Week_20	scRNA_5end_R2_only	Human_Neuron	1.50024	2	2	IN
GA20W_d20_ATGTGTGCAACCGCCA-1	20248	5759	GA20W_d20	d20	Cortex	Week_20	scRNA_5end_R2_only	Human_Neuron	1.0463	8	8	IN_Precursor
GA20W_d20_ATGTGTGCATGCCCGA-1	7149	3029	GA20W_d20	d20	Cortex	Week_20	scRNA_5end_R2_only	Human_Neuron	0.85858	2	2	IN
GA20W_d20_ATGTGTGGTACCCAAT-1	8952	3564	GA20W_d20	d20	Cortex	Week_20	scRNA_5end_R2_only	Human_Neuron	2.50718	10	10	IN
GA20W_d20_ATGTGTGGTACGACCC-1	596	445	GA20W_d20	d20	Cortex	Week_20	scRNA_5end_R2_only	Human_Neuron	15.3521	6	6	IN
GA20W_d20_ATGTGTGGTCAAAGAT-1	911	719	GA20W_d20	d20	Cortex	Week_20	scRNA_5end_R2_only	Human_Neuron	5.33881	6	6	IN
GA20W_d20_ATGTGTGGTCGCATAT-1	5602	3015	GA20W_d20	d20	Cortex	Week_20	scRNA_5end_R2_only	Human_Neuron	1.37463	0	0	EN
GA20W_d20_ATGTGTGGTGGTCCGT-1	12817	4751	GA20W_d20	d20	Cortex	Week_20	scRNA_5end_R2_only	Human_Neuron	0.529248	2	2	IN
GA20W_d20_ATGTGTGGTTCCATGA-1	3438	2100	GA20W_d20	d20	Cortex	Week_20	scRNA_5end_R2_only	Human_Neuron	2.73181	4	4	IN
GA20W_d20_ATTACTCAGAATGTGT-1	1478	936	GA20W_d20	d20	Cortex	Week_20	scRNA_5end_R2_only	Human_Neuron	1.79856	16	16	RG
GA20W_d20_ATTACTCAGCGATGAC-1	688	528	GA20W_d20	d20	Cortex	Week_20	scRNA_5end_R2_only	Human_Neuron	4.79452	6	6	IN
GA20W_d20_ATTACTCAGCTGCCCA-1	583	474	GA20W_d20	d20	Cortex	Week_20	scRNA_5end_R2_only	Human_Neuron	0	16	16	RG
GA20W_d20_ATTACTCGTACCGTAT-1	11161	4560	GA20W_d20	d20	Cortex	Week_20	scRNA_5end_R2_only	Human_Neuron	1.41809	13	13	Oligo
GA20W_d20_ATTACTCGTCACCTAA-1	6536	3095	GA20W_d20	d20	Cortex	Week_20	scRNA_5end_R2_only	Human_Neuron	3.49578	10	10	IN
GA20W_d20_ATTACTCTCGAGGTAG-1	13184	5033	GA20W_d20	d20	Cortex	Week_20	scRNA_5end_R2_only	Human_Neuron	0.485403	17	17	IN
GA20W_d20_ATTACTCTCTCTGCTG-1	6060	2821	GA20W_d20	d20	Cortex	Week_20	scRNA_5end_R2_only	Human_Neuron	1.8137	2	2	IN
GA20W_d20_ATTATCCCATTGGGCC-1	3138	1989	GA20W_d20	d20	Cortex	Week_20	scRNA_5end_R2_only	Human_Neuron	2.30441	4	4	IN
GA20W_d20_ATTATCCGTAGCCTCG-1	9644	4049	GA20W_d20	d20	Cortex	Week_20	scRNA_5end_R2_only	Human_Neuron	3.75427	10	10	IN
GA20W_d20_ATTATCCGTCAATGTC-1	828	667	GA20W_d20	d20	Cortex	Week_20	scRNA_5end_R2_only	Human_Neuron	9.51872	12	12	EN
GA20W_d20_ATTATCCGTGACAAAT-1	8034	3189	GA20W_d20	d20	Cortex	Week_20	scRNA_5end_R2_only	Human_Neuron	2.16929	2	2	IN
GA20W_d20_ATTATCCGTTGGAGGT-1	6397	3367	GA20W_d20	d20	Cortex	Week_20	scRNA_5end_R2_only	Human_Neuron	3.8721	0	0	EN
GA20W_d20_ATTATCCTCGAGAACG-1	2317	1623	GA20W_d20	d20	Cortex	Week_20	scRNA_5end_R2_only	Human_Neuron	13.7844	8	8	IN_Precursor
GA20W_d20_ATTCTACAGCACCGCT-1	13453	4846	GA20W_d20	d20	Cortex	Week_20	scRNA_5end_R2_only	Human_Neuron	1.03655	5	5	IN_Precursor
GA20W_d20_ATTCTACAGCAGATCG-1	4687	2618	GA20W_d20	d20	Cortex	Week_20	scRNA_5end_R2_only	Human_Neuron	1.29419	2	2	IN
GA20W_d20_ATTCTACAGGAGTAGA-1	20146	5776	GA20W_d20	d20	Cortex	Week_20	scRNA_5end_R2_only	Human_Neuron	2.43183	7	7	ASCL1+ IPC
GA20W_d20_ATTCTACAGGCCCGTT-1	4087	2584	GA20W_d20	d20	Cortex	Week_20	scRNA_5end_R2_only	Human_Neuron	0.0462642	9	9	RG
GA20W_d20_ATTCTACAGTGTGGCA-1	6229	3003	GA20W_d20	d20	Cortex	Week_20	scRNA_5end_R2_only	Human_Neuron	1.74874	2	2	IN
GA20W_d20_ATTCTACCAACCGCCA-1	3533	2128	GA20W_d20	d20	Cortex	Week_20	scRNA_5end_R2_only	Human_Neuron	1.19264	4	4	IN
GA20W_d20_ATTCTACCACAACTGT-1	8592	3834	GA20W_d20	d20	Cortex	Week_20	scRNA_5end_R2_only	Human_Neuron	3.32212	3	3	EOMES+ IPC
GA20W_d20_ATTCTACCAGGGATTG-1	6426	3001	GA20W_d20	d20	Cortex	Week_20	scRNA_5end_R2_only	Human_Neuron	2.49571	2	2	IN
GA20W_d20_ATTCTACGTAAGGATT-1	6055	3081	GA20W_d20	d20	Cortex	Week_20	scRNA_5end_R2_only	Human_Neuron	1.89974	0	0	EN
GA20W_d20_ATTCTACGTCAGAATA-1	6371	3232	GA20W_d20	d20	Cortex	Week_20	scRNA_5end_R2_only	Human_Neuron	2.45297	0	0	EN
GA20W_d20_ATTCTACTCGACAGCC-1	1011	801	GA20W_d20	d20	Cortex	Week_20	scRNA_5end_R2_only	Human_Neuron	0.574713	15	15	Astro
GA20W_d20_ATTCTACTCGAGGTAG-1	5389	2971	GA20W_d20	d20	Cortex	Week_20	scRNA_5end_R2_only	Human_Neuron	0.584896	1	1	EN
GA20W_d20_ATTGGACAGACCTTTG-1	11493	4499	GA20W_d20	d20	Cortex	Week_20	scRNA_5end_R2_only	Human_Neuron	4.29448	9	9	RG
GA20W_d20_ATTGGACCAAGGTGTG-1	11561	4463	GA20W_d20	d20	Cortex	Week_20	scRNA_5end_R2_only	Human_Neuron	2.63431	7	7	ASCL1+ IPC
GA20W_d20_ATTGGACGTAAATACG-1	3525	2153	GA20W_d20	d20	Cortex	Week_20	scRNA_5end_R2_only	Human_Neuron	0.0826674	4	4	IN
GA20W_d20_ATTGGACGTACACCGC-1	4752	2476	GA20W_d20	d20	Cortex	Week_20	scRNA_5end_R2_only	Human_Neuron	9.14726	7	7	ASCL1+ IPC
GA20W_d20_ATTGGACGTAGGAGTC-1	12145	4397	GA20W_d20	d20	Cortex	Week_20	scRNA_5end_R2_only	Human_Neuron	1.951	5	5	IN_Precursor
GA20W_d20_ATTGGACTCATCTGTT-1	2040	1364	GA20W_d20	d20	Cortex	Week_20	scRNA_5end_R2_only	Human_Neuron	15.2738	3	3	EOMES+ IPC
GA20W_d20_ATTGGACTCGCGATCG-1	20747	5602	GA20W_d20	d20	Cortex	Week_20	scRNA_5end_R2_only	Human_Neuron	2.15086	7	7	ASCL1+ IPC
GA20W_d20_ATTGGACTCTGATACG-1	18662	5635	GA20W_d20	d20	Cortex	Week_20	scRNA_5end_R2_only	Human_Neuron	0.886644	9	9	RG
GA20W_d20_ATTGGACTCTTAACCT-1	7130	3292	GA20W_d20	d20	Cortex	Week_20	scRNA_5end_R2_only	Human_Neuron	2.71554	2	2	IN
GA20W_d20_ATTGGTGAGACGCAAC-1	3897	2265	GA20W_d20	d20	Cortex	Week_20	scRNA_5end_R2_only	Human_Neuron	11.9191	14	14	Astro
GA20W_d20_ATTGGTGAGGAATTAC-1	17843	5629	GA20W_d20	d20	Cortex	Week_20	scRNA_5end_R2_only	Human_Neuron	3.05297	7	7	ASCL1+ IPC
GA20W_d20_ATTGGTGAGTACGTAA-1	1032	671	GA20W_d20	d20	Cortex	Week_20	scRNA_5end_R2_only	Human_Neuron	0	16	16	RG
GA20W_d20_ATTGGTGCAGGTGCCT-1	13808	4742	GA20W_d20	d20	Cortex	Week_20	scRNA_5end_R2_only	Human_Neuron	0.945469	5	5	IN_Precursor
GA20W_d20_ATTGGTGGTAGAGTGC-1	9536	4097	GA20W_d20	d20	Cortex	Week_20	scRNA_5end_R2_only	Human_Neuron	0.821998	1	1	EN
GA20W_d20_ATTGGTGGTCGCATAT-1	12226	4620	GA20W_d20	d20	Cortex	Week_20	scRNA_5end_R2_only	Human_Neuron	1.44596	2	2	IN
GA20W_d20_ATTGGTGGTCGCCATG-1	7384	3621	GA20W_d20	d20	Cortex	Week_20	scRNA_5end_R2_only	Human_Neuron	0.802206	1	1	EN
GA20W_d20_ATTTCTGCACGGTTTA-1	8619	3545	GA20W_d20	d20	Cortex	Week_20	scRNA_5end_R2_only	Human_Neuron	1.64133	3	3	EOMES+ IPC
GA20W_d20_ATTTCTGCACTATCTT-1	9428	4082	GA20W_d20	d20	Cortex	Week_20	scRNA_5end_R2_only	Human_Neuron	1.57618	7	7	ASCL1+ IPC
GA20W_d20_ATTTCTGGTATATGGA-1	6590	3239	GA20W_d20	d20	Cortex	Week_20	scRNA_5end_R2_only	Human_Neuron	1.89821	4	4	IN
GA20W_d20_ATTTCTGGTGTGTGCC-1	841	702	GA20W_d20	d20	Cortex	Week_20	scRNA_5end_R2_only	Human_Neuron	9.79766	6	6	IN
GA20W_d20_ATTTCTGTCGGCCGAT-1	7851	3227	GA20W_d20	d20	Cortex	Week_20	scRNA_5end_R2_only	Human_Neuron	1.32205	8	8	IN_Precursor
GA20W_d20_ATTTCTGTCTAGAGTC-1	14849	4752	GA20W_d20	d20	Cortex	Week_20	scRNA_5end_R2_only	Human_Neuron	1.42681	5	5	IN_Precursor
GA20W_d20_ATTTCTGTCTTACCGC-1	1865	1309	GA20W_d20	d20	Cortex	Week_20	scRNA_5end_R2_only	Human_Neuron	9.3001	1	1	EN
GA20W_d20_CAACCAAAGGCTCATT-1	12691	4810	GA20W_d20	d20	Cortex	Week_20	scRNA_5end_R2_only	Human_Neuron	2.03921	5	5	IN_Precursor
GA20W_d20_CAACCAAAGTGAAGAG-1	8232	3603	GA20W_d20	d20	Cortex	Week_20	scRNA_5end_R2_only	Human_Neuron	0.608071	4	4	IN
GA20W_d20_CAACCAAAGTGGACGT-1	5154	2712	GA20W_d20	d20	Cortex	Week_20	scRNA_5end_R2_only	Human_Neuron	2.72061	13	13	Oligo
GA20W_d20_CAACCAACACAGACAG-1	823	601	GA20W_d20	d20	Cortex	Week_20	scRNA_5end_R2_only	Human_Neuron	9.88056	6	6	IN
GA20W_d20_CAACCAAGTACGACCC-1	9907	4248	GA20W_d20	d20	Cortex	Week_20	scRNA_5end_R2_only	Human_Neuron	0.610501	0	0	EN
GA20W_d20_CAACCAAGTAGTACCT-1	11874	4358	GA20W_d20	d20	Cortex	Week_20	scRNA_5end_R2_only	Human_Neuron	1.45701	5	5	IN_Precursor
GA20W_d20_CAACCAATCGGAAACG-1	3811	2321	GA20W_d20	d20	Cortex	Week_20	scRNA_5end_R2_only	Human_Neuron	2.77205	16	16	RG
GA20W_d20_CAACCTCAGAGCTGCA-1	5834	2654	GA20W_d20	d20	Cortex	Week_20	scRNA_5end_R2_only	Human_Neuron	2.00821	2	2	IN
GA20W_d20_CAACCTCAGCTGAAAT-1	16186	5343	GA20W_d20	d20	Cortex	Week_20	scRNA_5end_R2_only	Human_Neuron	2.03461	2	2	IN
GA20W_d20_CAACCTCAGGGTTCCC-1	7178	3424	GA20W_d20	d20	Cortex	Week_20	scRNA_5end_R2_only	Human_Neuron	2.60987	13	13	Oligo
GA20W_d20_CAACCTCAGTACGCGA-1	18211	5997	GA20W_d20	d20	Cortex	Week_20	scRNA_5end_R2_only	Human_Neuron	3.1213	7	7	ASCL1+ IPC
GA20W_d20_CAACCTCCATCCTTGC-1	8479	3763	GA20W_d20	d20	Cortex	Week_20	scRNA_5end_R2_only	Human_Neuron	2.01498	2	2	IN
GA20W_d20_CAACCTCGTCACTGGC-1	1939	1207	GA20W_d20	d20	Cortex	Week_20	scRNA_5end_R2_only	Human_Neuron	14.1224	16	16	RG
GA20W_d20_CAACCTCGTCCAGTTA-1	1118	758	GA20W_d20	d20	Cortex	Week_20	scRNA_5end_R2_only	Human_Neuron	14.3399	6	6	IN
GA20W_d20_CAACCTCGTCCTCCAT-1	11333	4306	GA20W_d20	d20	Cortex	Week_20	scRNA_5end_R2_only	Human_Neuron	1.58894	5	5	IN_Precursor
GA20W_d20_CAACCTCGTCTTCAAG-1	6715	3332	GA20W_d20	d20	Cortex	Week_20	scRNA_5end_R2_only	Human_Neuron	2.68013	13	13	Oligo
GA20W_d20_CAACCTCGTGTGACGA-1	14632	4752	GA20W_d20	d20	Cortex	Week_20	scRNA_5end_R2_only	Human_Neuron	1.60454	5	5	IN_Precursor
GA20W_d20_CAACCTCGTTCTGTTT-1	6115	2956	GA20W_d20	d20	Cortex	Week_20	scRNA_5end_R2_only	Human_Neuron	1.16212	2	2	IN
GA20W_d20_CAACCTCGTTTAAGCC-1	3564	2096	GA20W_d20	d20	Cortex	Week_20	scRNA_5end_R2_only	Human_Neuron	10.0812	9	9	RG
GA20W_d20_CAACCTCGTTTGACTG-1	4574	2503	GA20W_d20	d20	Cortex	Week_20	scRNA_5end_R2_only	Human_Neuron	1.39887	2	2	IN
GA20W_d20_CAACCTCTCCATTCTA-1	11689	4424	GA20W_d20	d20	Cortex	Week_20	scRNA_5end_R2_only	Human_Neuron	1.43269	5	5	IN_Precursor
GA20W_d20_CAACCTCTCCTTAATC-1	10060	4151	GA20W_d20	d20	Cortex	Week_20	scRNA_5end_R2_only	Human_Neuron	1.4698	3	3	EOMES+ IPC
GA20W_d20_CAACCTCTCCTTGACC-1	11829	4759	GA20W_d20	d20	Cortex	Week_20	scRNA_5end_R2_only	Human_Neuron	0.793464	0	0	EN
GA20W_d20_CAACTAGAGACCTTTG-1	8969	3818	GA20W_d20	d20	Cortex	Week_20	scRNA_5end_R2_only	Human_Neuron	2.63441	4	4	IN
GA20W_d20_CAACTAGAGAGGTAGA-1	727	562	GA20W_d20	d20	Cortex	Week_20	scRNA_5end_R2_only	Human_Neuron	2.53672	12	12	EN
GA20W_d20_CAACTAGAGCGTGAGT-1	11018	4120	GA20W_d20	d20	Cortex	Week_20	scRNA_5end_R2_only	Human_Neuron	1.16664	5	5	IN_Precursor
GA20W_d20_CAACTAGAGCTAACTC-1	8585	3663	GA20W_d20	d20	Cortex	Week_20	scRNA_5end_R2_only	Human_Neuron	2.36082	4	4	IN
GA20W_d20_CAACTAGAGGCACATG-1	3328	1974	GA20W_d20	d20	Cortex	Week_20	scRNA_5end_R2_only	Human_Neuron	0.223526	4	4	IN
GA20W_d20_CAACTAGAGTTGAGTA-1	7748	3435	GA20W_d20	d20	Cortex	Week_20	scRNA_5end_R2_only	Human_Neuron	3.75468	3	3	EOMES+ IPC
GA20W_d20_CAACTAGCAAACCCAT-1	20300	5726	GA20W_d20	d20	Cortex	Week_20	scRNA_5end_R2_only	Human_Neuron	1.51502	11	11	EN
GA20W_d20_CAACTAGCAGGCGATA-1	18822	5571	GA20W_d20	d20	Cortex	Week_20	scRNA_5end_R2_only	Human_Neuron	1.3526	2	2	IN
GA20W_d20_CAACTAGGTATCACCA-1	6262	2868	GA20W_d20	d20	Cortex	Week_20	scRNA_5end_R2_only	Human_Neuron	1.79211	2	2	IN
GA20W_d20_CAACTAGTCCGGGTGT-1	10260	4010	GA20W_d20	d20	Cortex	Week_20	scRNA_5end_R2_only	Human_Neuron	1.87649	2	2	IN
GA20W_d20_CAACTAGTCGTATCAG-1	8043	3798	GA20W_d20	d20	Cortex	Week_20	scRNA_5end_R2_only	Human_Neuron	2.08071	1	1	EN
GA20W_d20_CAACTAGTCTCCTATA-1	11730	4692	GA20W_d20	d20	Cortex	Week_20	scRNA_5end_R2_only	Human_Neuron	3.26249	13	13	Oligo
GA20W_d20_CAAGAAAAGAGGTTGC-1	11362	4690	GA20W_d20	d20	Cortex	Week_20	scRNA_5end_R2_only	Human_Neuron	2.36682	18	18	EN
GA20W_d20_CAAGAAAAGATCCCAT-1	6942	2874	GA20W_d20	d20	Cortex	Week_20	scRNA_5end_R2_only	Human_Neuron	1.36578	10	10	IN
GA20W_d20_CAAGAAAAGGTGACCA-1	12958	4918	GA20W_d20	d20	Cortex	Week_20	scRNA_5end_R2_only	Human_Neuron	0.437791	11	11	EN
GA20W_d20_CAAGAAACAATAAGCA-1	3698	2276	GA20W_d20	d20	Cortex	Week_20	scRNA_5end_R2_only	Human_Neuron	1.42963	4	4	IN
GA20W_d20_CAAGAAACAGCCAGAA-1	10177	3820	GA20W_d20	d20	Cortex	Week_20	scRNA_5end_R2_only	Human_Neuron	1.68974	5	5	IN_Precursor
GA20W_d20_CAAGAAAGTTGAGGTG-1	13096	4582	GA20W_d20	d20	Cortex	Week_20	scRNA_5end_R2_only	Human_Neuron	2.0482	7	7	ASCL1+ IPC
GA20W_d20_CAAGAAATCGTGACAT-1	3918	2345	GA20W_d20	d20	Cortex	Week_20	scRNA_5end_R2_only	Human_Neuron	0.402617	0	0	EN
GA20W_d20_CAAGAAATCTCGATGA-1	4743	2412	GA20W_d20	d20	Cortex	Week_20	scRNA_5end_R2_only	Human_Neuron	1.29895	10	10	IN
GA20W_d20_CAAGATCAGAAACCTA-1	4233	2521	GA20W_d20	d20	Cortex	Week_20	scRNA_5end_R2_only	Human_Neuron	0.0228102	1	1	EN
GA20W_d20_CAAGATCAGAGTAATC-1	6596	3484	GA20W_d20	d20	Cortex	Week_20	scRNA_5end_R2_only	Human_Neuron	2.73543	13	13	Oligo
GA20W_d20_CAAGATCAGGAATGGA-1	2884	1811	GA20W_d20	d20	Cortex	Week_20	scRNA_5end_R2_only	Human_Neuron	2.85996	4	4	IN
GA20W_d20_CAAGATCAGGACGAAA-1	13271	4761	GA20W_d20	d20	Cortex	Week_20	scRNA_5end_R2_only	Human_Neuron	2.78021	5	5	IN_Precursor
GA20W_d20_CAAGATCCAATGGAAT-1	2309	1546	GA20W_d20	d20	Cortex	Week_20	scRNA_5end_R2_only	Human_Neuron	0	4	4	IN
GA20W_d20_CAAGATCCAGTCGTGC-1	6200	2893	GA20W_d20	d20	Cortex	Week_20	scRNA_5end_R2_only	Human_Neuron	2.93747	2	2	IN
GA20W_d20_CAAGATCGTCCAGTTA-1	11291	4173	GA20W_d20	d20	Cortex	Week_20	scRNA_5end_R2_only	Human_Neuron	2.51318	2	2	IN
GA20W_d20_CAAGATCGTCGACTAT-1	12098	4242	GA20W_d20	d20	Cortex	Week_20	scRNA_5end_R2_only	Human_Neuron	2.42105	5	5	IN_Precursor
GA20W_d20_CAAGATCTCCAAACAC-1	6072	2827	GA20W_d20	d20	Cortex	Week_20	scRNA_5end_R2_only	Human_Neuron	2.1205	2	2	IN
GA20W_d20_CAAGATCTCCAGTAGT-1	1165	856	GA20W_d20	d20	Cortex	Week_20	scRNA_5end_R2_only	Human_Neuron	2.32558	6	6	IN
GA20W_d20_CAAGATCTCCTATTCA-1	8336	3566	GA20W_d20	d20	Cortex	Week_20	scRNA_5end_R2_only	Human_Neuron	3.4343	3	3	EOMES+ IPC
GA20W_d20_CAAGGCCAGAATTGTG-1	10902	4238	GA20W_d20	d20	Cortex	Week_20	scRNA_5end_R2_only	Human_Neuron	2.62386	5	5	IN_Precursor
GA20W_d20_CAAGGCCAGATCACGG-1	8951	3600	GA20W_d20	d20	Cortex	Week_20	scRNA_5end_R2_only	Human_Neuron	1.05371	8	8	IN_Precursor
GA20W_d20_CAAGGCCAGCAGCCTC-1	676	546	GA20W_d20	d20	Cortex	Week_20	scRNA_5end_R2_only	Human_Neuron	10.6218	6	6	IN
GA20W_d20_CAAGGCCAGTGTGAAT-1	24844	6328	GA20W_d20	d20	Cortex	Week_20	scRNA_5end_R2_only	Human_Neuron	1.70067	11	11	EN
GA20W_d20_CAAGGCCCAACTTGAC-1	14114	5002	GA20W_d20	d20	Cortex	Week_20	scRNA_5end_R2_only	Human_Neuron	3.96582	11	11	EN
GA20W_d20_CAAGGCCCAAGAGTCG-1	3244	1944	GA20W_d20	d20	Cortex	Week_20	scRNA_5end_R2_only	Human_Neuron	2.15866	2	2	IN
GA20W_d20_CAAGGCCCATGGTCTA-1	4040	2364	GA20W_d20	d20	Cortex	Week_20	scRNA_5end_R2_only	Human_Neuron	1.86437	2	2	IN
GA20W_d20_CAAGGCCCATTCTTAC-1	15782	4814	GA20W_d20	d20	Cortex	Week_20	scRNA_5end_R2_only	Human_Neuron	1.1509	8	8	IN_Precursor
GA20W_d20_CAAGGCCGTCCAGTAT-1	1694	1171	GA20W_d20	d20	Cortex	Week_20	scRNA_5end_R2_only	Human_Neuron	16.2512	14	14	Astro
GA20W_d20_CAAGGCCGTCTTTCAT-1	557	449	GA20W_d20	d20	Cortex	Week_20	scRNA_5end_R2_only	Human_Neuron	0	6	6	IN
GA20W_d20_CAAGGCCTCAGTTGAC-1	6030	3182	GA20W_d20	d20	Cortex	Week_20	scRNA_5end_R2_only	Human_Neuron	0.896649	0	0	EN
GA20W_d20_CAAGGCCTCCTATTCA-1	10622	4077	GA20W_d20	d20	Cortex	Week_20	scRNA_5end_R2_only	Human_Neuron	1.41428	5	5	IN_Precursor
GA20W_d20_CAAGGCCTCGTTGACA-1	598	517	GA20W_d20	d20	Cortex	Week_20	scRNA_5end_R2_only	Human_Neuron	13.7143	15	15	Astro
GA20W_d20_CAAGGCCTCTGCGTAA-1	10500	4311	GA20W_d20	d20	Cortex	Week_20	scRNA_5end_R2_only	Human_Neuron	1.30772	13	13	Oligo
GA20W_d20_CAAGTTGAGTAGGCCA-1	567	459	GA20W_d20	d20	Cortex	Week_20	scRNA_5end_R2_only	Human_Neuron	2.5641	17	17	IN
GA20W_d20_CAAGTTGCACATAACC-1	5182	2910	GA20W_d20	d20	Cortex	Week_20	scRNA_5end_R2_only	Human_Neuron	5.40347	12	12	EN
GA20W_d20_CAAGTTGCACATTCGA-1	2687	1879	GA20W_d20	d20	Cortex	Week_20	scRNA_5end_R2_only	Human_Neuron	17.7705	17	17	IN
GA20W_d20_CAAGTTGTCATAAAGG-1	3528	2064	GA20W_d20	d20	Cortex	Week_20	scRNA_5end_R2_only	Human_Neuron	1.04	4	4	IN
GA20W_d20_CACAAACAGCTGATAA-1	13886	4257	GA20W_d20	d20	Cortex	Week_20	scRNA_5end_R2_only	Human_Neuron	1.26725	8	8	IN_Precursor
GA20W_d20_CACAAACAGGCGTACA-1	3595	2121	GA20W_d20	d20	Cortex	Week_20	scRNA_5end_R2_only	Human_Neuron	0.298137	4	4	IN
GA20W_d20_CACAAACAGTGGACGT-1	11262	3926	GA20W_d20	d20	Cortex	Week_20	scRNA_5end_R2_only	Human_Neuron	1.29237	5	5	IN_Precursor
GA20W_d20_CACAAACCAAGCGTAG-1	3195	1999	GA20W_d20	d20	Cortex	Week_20	scRNA_5end_R2_only	Human_Neuron	0.690449	3	3	EOMES+ IPC
GA20W_d20_CACAAACCAATCCAAC-1	15581	5444	GA20W_d20	d20	Cortex	Week_20	scRNA_5end_R2_only	Human_Neuron	4.95886	7	7	ASCL1+ IPC
GA20W_d20_CACAAACCACCATGTA-1	847	655	GA20W_d20	d20	Cortex	Week_20	scRNA_5end_R2_only	Human_Neuron	8.125	6	6	IN
GA20W_d20_CACAAACCAGACAAAT-1	13967	4938	GA20W_d20	d20	Cortex	Week_20	scRNA_5end_R2_only	Human_Neuron	3.27993	9	9	RG
GA20W_d20_CACAAACCATGGAATA-1	7615	3530	GA20W_d20	d20	Cortex	Week_20	scRNA_5end_R2_only	Human_Neuron	1.03507	1	1	EN
GA20W_d20_CACAAACGTACTCTCC-1	3918	2269	GA20W_d20	d20	Cortex	Week_20	scRNA_5end_R2_only	Human_Neuron	2.01517	4	4	IN
GA20W_d20_CACAAACGTCATCCCT-1	20809	5312	GA20W_d20	d20	Cortex	Week_20	scRNA_5end_R2_only	Human_Neuron	1.79035	8	8	IN_Precursor
GA20W_d20_CACAAACGTCATTAGC-1	8349	3712	GA20W_d20	d20	Cortex	Week_20	scRNA_5end_R2_only	Human_Neuron	2.02142	4	4	IN
GA20W_d20_CACAAACGTCTGCCAG-1	12640	4756	GA20W_d20	d20	Cortex	Week_20	scRNA_5end_R2_only	Human_Neuron	2.32161	7	7	ASCL1+ IPC
GA20W_d20_CACAAACGTGGCCCTA-1	7578	3310	GA20W_d20	d20	Cortex	Week_20	scRNA_5end_R2_only	Human_Neuron	1.38614	3	3	EOMES+ IPC
GA20W_d20_CACAAACTCGCGATCG-1	2359	1653	GA20W_d20	d20	Cortex	Week_20	scRNA_5end_R2_only	Human_Neuron	1.97044	12	12	EN
GA20W_d20_CACAAACTCTCTTGAT-1	1080	735	GA20W_d20	d20	Cortex	Week_20	scRNA_5end_R2_only	Human_Neuron	9.88655	15	15	Astro
GA20W_d20_CACAAACTCTTGTCAT-1	15110	5117	GA20W_d20	d20	Cortex	Week_20	scRNA_5end_R2_only	Human_Neuron	1.65581	5	5	IN_Precursor
GA20W_d20_CACAAACTCTTTCCTC-1	3945	2307	GA20W_d20	d20	Cortex	Week_20	scRNA_5end_R2_only	Human_Neuron	1.10122	2	2	IN
GA20W_d20_CACACAAAGAACTGTA-1	972	720	GA20W_d20	d20	Cortex	Week_20	scRNA_5end_R2_only	Human_Neuron	15.1463	6	6	IN
GA20W_d20_CACACAAAGACCGGAT-1	8812	3994	GA20W_d20	d20	Cortex	Week_20	scRNA_5end_R2_only	Human_Neuron	2.62832	0	0	EN
GA20W_d20_CACACAAAGCAGACTG-1	12114	4530	GA20W_d20	d20	Cortex	Week_20	scRNA_5end_R2_only	Human_Neuron	2.46167	5	5	IN_Precursor
GA20W_d20_CACACAAAGCTCTCGG-1	2518	1663	GA20W_d20	d20	Cortex	Week_20	scRNA_5end_R2_only	Human_Neuron	2.10605	4	4	IN
GA20W_d20_CACACAACAACACGCC-1	7274	3266	GA20W_d20	d20	Cortex	Week_20	scRNA_5end_R2_only	Human_Neuron	1.28977	3	3	EOMES+ IPC
GA20W_d20_CACACAACAAGTTAAG-1	16297	5169	GA20W_d20	d20	Cortex	Week_20	scRNA_5end_R2_only	Human_Neuron	2.07347	5	5	IN_Precursor
GA20W_d20_CACACAACATCCGCGA-1	2542	1674	GA20W_d20	d20	Cortex	Week_20	scRNA_5end_R2_only	Human_Neuron	3.51852	4	4	IN
GA20W_d20_CACACAACATTCGACA-1	7257	3487	GA20W_d20	d20	Cortex	Week_20	scRNA_5end_R2_only	Human_Neuron	1.02896	10	10	IN
GA20W_d20_CACACAAGTACGCTGC-1	12351	4080	GA20W_d20	d20	Cortex	Week_20	scRNA_5end_R2_only	Human_Neuron	1.27384	8	8	IN_Precursor
GA20W_d20_CACACAAGTCAATGTC-1	1454	1013	GA20W_d20	d20	Cortex	Week_20	scRNA_5end_R2_only	Human_Neuron	0.0683995	17	17	IN
GA20W_d20_CACACAAGTCTCATCC-1	4293	2425	GA20W_d20	d20	Cortex	Week_20	scRNA_5end_R2_only	Human_Neuron	5.53015	14	14	Astro
GA20W_d20_CACACAAGTCTTGCGG-1	12920	4708	GA20W_d20	d20	Cortex	Week_20	scRNA_5end_R2_only	Human_Neuron	1.7012	5	5	IN_Precursor
GA20W_d20_CACACAAGTTGTGGCC-1	11165	4475	GA20W_d20	d20	Cortex	Week_20	scRNA_5end_R2_only	Human_Neuron	1.85231	2	2	IN
GA20W_d20_CACACAATCAAGGCTT-1	37480	8437	GA20W_d20	d20	Cortex	Week_20	scRNA_5end_R2_only	Human_Neuron	2.28137	11	11	EN
GA20W_d20_CACACAATCACTCTTA-1	38596	8076	GA20W_d20	d20	Cortex	Week_20	scRNA_5end_R2_only	Human_Neuron	1.40736	2	2	IN
GA20W_d20_CACACCTAGAGGTTAT-1	25704	6834	GA20W_d20	d20	Cortex	Week_20	scRNA_5end_R2_only	Human_Neuron	0.344954	11	11	EN
GA20W_d20_CACACCTCAAGGCTCC-1	9746	3993	GA20W_d20	d20	Cortex	Week_20	scRNA_5end_R2_only	Human_Neuron	3.66306	13	13	Oligo
GA20W_d20_CACACCTCACGGACAA-1	8361	3789	GA20W_d20	d20	Cortex	Week_20	scRNA_5end_R2_only	Human_Neuron	1.36706	4	4	IN
GA20W_d20_CACACCTCACGGTAGA-1	10216	4009	GA20W_d20	d20	Cortex	Week_20	scRNA_5end_R2_only	Human_Neuron	3.18792	3	3	EOMES+ IPC
GA20W_d20_CACACCTCACTAAGTC-1	7843	3619	GA20W_d20	d20	Cortex	Week_20	scRNA_5end_R2_only	Human_Neuron	1.54715	4	4	IN
GA20W_d20_CACACCTCAGATCCAT-1	10809	4263	GA20W_d20	d20	Cortex	Week_20	scRNA_5end_R2_only	Human_Neuron	3.05725	10	10	IN
GA20W_d20_CACACCTGTATAGGTA-1	5164	2771	GA20W_d20	d20	Cortex	Week_20	scRNA_5end_R2_only	Human_Neuron	1.70715	2	2	IN
GA20W_d20_CACACCTGTCAAAGAT-1	9384	3965	GA20W_d20	d20	Cortex	Week_20	scRNA_5end_R2_only	Human_Neuron	1.77691	13	13	Oligo
GA20W_d20_CACACCTGTCCAACTA-1	1903	1369	GA20W_d20	d20	Cortex	Week_20	scRNA_5end_R2_only	Human_Neuron	4.28287	17	17	IN
GA20W_d20_CACACCTGTGACTACT-1	5152	2875	GA20W_d20	d20	Cortex	Week_20	scRNA_5end_R2_only	Human_Neuron	0.214018	4	4	IN
GA20W_d20_CACACCTTCACAGTAC-1	2552	1685	GA20W_d20	d20	Cortex	Week_20	scRNA_5end_R2_only	Human_Neuron	3.30119	4	4	IN
GA20W_d20_CACACTCAGAGCTGGT-1	6621	3158	GA20W_d20	d20	Cortex	Week_20	scRNA_5end_R2_only	Human_Neuron	1.12553	3	3	EOMES+ IPC
GA20W_d20_CACACTCAGCTGATAA-1	2527	1562	GA20W_d20	d20	Cortex	Week_20	scRNA_5end_R2_only	Human_Neuron	4.35754	4	4	IN
GA20W_d20_CACACTCAGTACCGGA-1	15885	4726	GA20W_d20	d20	Cortex	Week_20	scRNA_5end_R2_only	Human_Neuron	2.16602	8	8	IN_Precursor
GA20W_d20_CACACTCCACTCGACG-1	19903	5909	GA20W_d20	d20	Cortex	Week_20	scRNA_5end_R2_only	Human_Neuron	0.983529	8	8	IN_Precursor
GA20W_d20_CACACTCGTAAGTGGC-1	8668	3744	GA20W_d20	d20	Cortex	Week_20	scRNA_5end_R2_only	Human_Neuron	2.76824	3	3	EOMES+ IPC
GA20W_d20_CACACTCGTCCGTGAC-1	2043	1370	GA20W_d20	d20	Cortex	Week_20	scRNA_5end_R2_only	Human_Neuron	3.01232	4	4	IN
GA20W_d20_CACACTCTCAGTTAGC-1	8244	3810	GA20W_d20	d20	Cortex	Week_20	scRNA_5end_R2_only	Human_Neuron	3.03545	3	3	EOMES+ IPC
GA20W_d20_CACACTCTCATATCGG-1	7561	3308	GA20W_d20	d20	Cortex	Week_20	scRNA_5end_R2_only	Human_Neuron	2.91251	4	4	IN
GA20W_d20_CACAGGCAGAACAACT-1	17421	5577	GA20W_d20	d20	Cortex	Week_20	scRNA_5end_R2_only	Human_Neuron	2.33055	5	5	IN_Precursor
GA20W_d20_CACAGGCAGGCAATTA-1	9038	3897	GA20W_d20	d20	Cortex	Week_20	scRNA_5end_R2_only	Human_Neuron	2.47539	9	9	RG
GA20W_d20_CACAGGCCAAACGCGA-1	11500	4064	GA20W_d20	d20	Cortex	Week_20	scRNA_5end_R2_only	Human_Neuron	1.8685	8	8	IN_Precursor
GA20W_d20_CACAGGCCAAGTCATC-1	21223	6043	GA20W_d20	d20	Cortex	Week_20	scRNA_5end_R2_only	Human_Neuron	0.248458	11	11	EN
GA20W_d20_CACAGGCCACCTGGTG-1	14769	4529	GA20W_d20	d20	Cortex	Week_20	scRNA_5end_R2_only	Human_Neuron	0.6127	8	8	IN_Precursor
GA20W_d20_CACAGGCCAGTGAGTG-1	34812	7502	GA20W_d20	d20	Cortex	Week_20	scRNA_5end_R2_only	Human_Neuron	1.21986	8	8	IN_Precursor
GA20W_d20_CACAGGCCATGGAATA-1	6193	2977	GA20W_d20	d20	Cortex	Week_20	scRNA_5end_R2_only	Human_Neuron	2.79788	2	2	IN
GA20W_d20_CACAGGCGTATAGTAG-1	19865	5302	GA20W_d20	d20	Cortex	Week_20	scRNA_5end_R2_only	Human_Neuron	2.12266	8	8	IN_Precursor
GA20W_d20_CACAGGCGTATATGGA-1	4904	2645	GA20W_d20	d20	Cortex	Week_20	scRNA_5end_R2_only	Human_Neuron	1.36423	2	2	IN
GA20W_d20_CACAGGCGTGTTAAGA-1	8878	3727	GA20W_d20	d20	Cortex	Week_20	scRNA_5end_R2_only	Human_Neuron	2.67279	7	7	ASCL1+ IPC
GA20W_d20_CACAGGCTCAGCGATT-1	6901	3330	GA20W_d20	d20	Cortex	Week_20	scRNA_5end_R2_only	Human_Neuron	4.6491	2	2	IN
GA20W_d20_CACAGGCTCCATGAAC-1	980	733	GA20W_d20	d20	Cortex	Week_20	scRNA_5end_R2_only	Human_Neuron	0	6	6	IN
GA20W_d20_CACAGGCTCCCAGGTG-1	16119	5489	GA20W_d20	d20	Cortex	Week_20	scRNA_5end_R2_only	Human_Neuron	1.94003	7	7	ASCL1+ IPC
GA20W_d20_CACAGGCTCTCTTATG-1	9663	4417	GA20W_d20	d20	Cortex	Week_20	scRNA_5end_R2_only	Human_Neuron	2.27753	0	0	EN
GA20W_d20_CACAGGCTCTGCGTAA-1	5637	2613	GA20W_d20	d20	Cortex	Week_20	scRNA_5end_R2_only	Human_Neuron	1.9745	2	2	IN
GA20W_d20_CACAGTAAGTAGTGCG-1	1028	779	GA20W_d20	d20	Cortex	Week_20	scRNA_5end_R2_only	Human_Neuron	3.61781	6	6	IN
GA20W_d20_CACAGTAAGTGACTCT-1	21038	5828	GA20W_d20	d20	Cortex	Week_20	scRNA_5end_R2_only	Human_Neuron	2.41651	8	8	IN_Precursor
GA20W_d20_CACAGTACACTTCGAA-1	16603	5316	GA20W_d20	d20	Cortex	Week_20	scRNA_5end_R2_only	Human_Neuron	2.02425	9	9	RG
GA20W_d20_CACAGTAGTACCTACA-1	3461	2050	GA20W_d20	d20	Cortex	Week_20	scRNA_5end_R2_only	Human_Neuron	1.50198	4	4	IN
GA20W_d20_CACAGTAGTATGAAAC-1	7444	3482	GA20W_d20	d20	Cortex	Week_20	scRNA_5end_R2_only	Human_Neuron	3.24736	2	2	IN
GA20W_d20_CACAGTAGTCCAAGTT-1	14232	4717	GA20W_d20	d20	Cortex	Week_20	scRNA_5end_R2_only	Human_Neuron	1.81159	5	5	IN_Precursor
GA20W_d20_CACAGTAGTTATCCGA-1	9666	4222	GA20W_d20	d20	Cortex	Week_20	scRNA_5end_R2_only	Human_Neuron	2.65819	0	0	EN
GA20W_d20_CACAGTATCAAGAAGT-1	2383	1554	GA20W_d20	d20	Cortex	Week_20	scRNA_5end_R2_only	Human_Neuron	0.612792	2	2	IN
GA20W_d20_CACATAGAGAGTACCG-1	9213	3600	GA20W_d20	d20	Cortex	Week_20	scRNA_5end_R2_only	Human_Neuron	2.02312	10	10	IN
GA20W_d20_CACATAGAGGCTACGA-1	11598	4236	GA20W_d20	d20	Cortex	Week_20	scRNA_5end_R2_only	Human_Neuron	1.53676	5	5	IN_Precursor
GA20W_d20_CACATAGAGTCGTACT-1	5214	2620	GA20W_d20	d20	Cortex	Week_20	scRNA_5end_R2_only	Human_Neuron	1.28814	2	2	IN
GA20W_d20_CACATAGCAGTCTTCC-1	2370	1703	GA20W_d20	d20	Cortex	Week_20	scRNA_5end_R2_only	Human_Neuron	14.4535	12	12	EN
GA20W_d20_CACATAGCATTTCAGG-1	9268	4000	GA20W_d20	d20	Cortex	Week_20	scRNA_5end_R2_only	Human_Neuron	6.39942	8	8	IN_Precursor
GA20W_d20_CACATAGGTTGGAGGT-1	1633	1224	GA20W_d20	d20	Cortex	Week_20	scRNA_5end_R2_only	Human_Neuron	0.778443	4	4	IN
GA20W_d20_CACATAGTCAACACAC-1	9301	3666	GA20W_d20	d20	Cortex	Week_20	scRNA_5end_R2_only	Human_Neuron	1.26767	5	5	IN_Precursor
GA20W_d20_CACATAGTCCTAGAAC-1	22479	6344	GA20W_d20	d20	Cortex	Week_20	scRNA_5end_R2_only	Human_Neuron	1.54715	11	11	EN
GA20W_d20_CACATAGTCTCTGCTG-1	3528	2112	GA20W_d20	d20	Cortex	Week_20	scRNA_5end_R2_only	Human_Neuron	2.0461	4	4	IN
GA20W_d20_CACATAGTCTTGCAAG-1	8953	3859	GA20W_d20	d20	Cortex	Week_20	scRNA_5end_R2_only	Human_Neuron	2.46479	1	1	EN
GA20W_d20_CACATTTAGGTGACCA-1	808	646	GA20W_d20	d20	Cortex	Week_20	scRNA_5end_R2_only	Human_Neuron	0	6	6	IN
GA20W_d20_CACATTTAGTTATCGC-1	16001	5639	GA20W_d20	d20	Cortex	Week_20	scRNA_5end_R2_only	Human_Neuron	4.99711	7	7	ASCL1+ IPC
GA20W_d20_CACATTTCACCAGTTA-1	7975	3539	GA20W_d20	d20	Cortex	Week_20	scRNA_5end_R2_only	Human_Neuron	2.03321	4	4	IN
GA20W_d20_CACATTTCACTTCGAA-1	5290	2702	GA20W_d20	d20	Cortex	Week_20	scRNA_5end_R2_only	Human_Neuron	1.32029	2	2	IN
GA20W_d20_CACATTTCAGTGACAG-1	858	646	GA20W_d20	d20	Cortex	Week_20	scRNA_5end_R2_only	Human_Neuron	7.35608	6	6	IN
GA20W_d20_CACATTTGTAGGCATG-1	10143	4109	GA20W_d20	d20	Cortex	Week_20	scRNA_5end_R2_only	Human_Neuron	2.23706	4	4	IN
GA20W_d20_CACATTTGTCTAGGTT-1	3700	2175	GA20W_d20	d20	Cortex	Week_20	scRNA_5end_R2_only	Human_Neuron	0.152827	4	4	IN
GA20W_d20_CACATTTGTTCAACCA-1	10518	3873	GA20W_d20	d20	Cortex	Week_20	scRNA_5end_R2_only	Human_Neuron	1.61432	5	5	IN_Precursor
GA20W_d20_CACATTTGTTGTCTTT-1	4617	2690	GA20W_d20	d20	Cortex	Week_20	scRNA_5end_R2_only	Human_Neuron	1.92117	2	2	IN
GA20W_d20_CACATTTTCATTCACT-1	18226	5534	GA20W_d20	d20	Cortex	Week_20	scRNA_5end_R2_only	Human_Neuron	1.95733	8	8	IN_Precursor
GA20W_d20_CACCACTCACCAGCAC-1	12286	4560	GA20W_d20	d20	Cortex	Week_20	scRNA_5end_R2_only	Human_Neuron	1.33342	9	9	RG
GA20W_d20_CACCACTGTAGCGCTC-1	6094	3099	GA20W_d20	d20	Cortex	Week_20	scRNA_5end_R2_only	Human_Neuron	3.90988	4	4	IN
GA20W_d20_CACCACTGTGCGCTTG-1	2398	1584	GA20W_d20	d20	Cortex	Week_20	scRNA_5end_R2_only	Human_Neuron	1.06601	2	2	IN
GA20W_d20_CACCACTGTGCTTCTC-1	5966	3048	GA20W_d20	d20	Cortex	Week_20	scRNA_5end_R2_only	Human_Neuron	2.61749	2	2	IN
GA20W_d20_CACCACTGTTGGTAAA-1	1445	947	GA20W_d20	d20	Cortex	Week_20	scRNA_5end_R2_only	Human_Neuron	0	16	16	RG
GA20W_d20_CACCACTGTTTGGCGC-1	1083	835	GA20W_d20	d20	Cortex	Week_20	scRNA_5end_R2_only	Human_Neuron	6.07877	6	6	IN
GA20W_d20_CACCACTTCCAATGGT-1	8984	3793	GA20W_d20	d20	Cortex	Week_20	scRNA_5end_R2_only	Human_Neuron	1.89647	4	4	IN
GA20W_d20_CACCACTTCCCTCAGT-1	13841	4713	GA20W_d20	d20	Cortex	Week_20	scRNA_5end_R2_only	Human_Neuron	1.74876	5	5	IN_Precursor
GA20W_d20_CACCACTTCGGATGTT-1	5282	2803	GA20W_d20	d20	Cortex	Week_20	scRNA_5end_R2_only	Human_Neuron	5.35881	2	2	IN
GA20W_d20_CACCAGGAGTTAGCGG-1	3553	2192	GA20W_d20	d20	Cortex	Week_20	scRNA_5end_R2_only	Human_Neuron	6.17027	10	10	IN
GA20W_d20_CACCAGGCAATGGTCT-1	13663	5298	GA20W_d20	d20	Cortex	Week_20	scRNA_5end_R2_only	Human_Neuron	0.289815	11	11	EN
GA20W_d20_CACCAGGCAATTGCTG-1	14344	4809	GA20W_d20	d20	Cortex	Week_20	scRNA_5end_R2_only	Human_Neuron	1.25253	5	5	IN_Precursor
GA20W_d20_CACCAGGCAGACACTT-1	3596	2192	GA20W_d20	d20	Cortex	Week_20	scRNA_5end_R2_only	Human_Neuron	2.80301	2	2	IN
GA20W_d20_CACCAGGCATACGCTA-1	14154	4870	GA20W_d20	d20	Cortex	Week_20	scRNA_5end_R2_only	Human_Neuron	1.05424	4	4	IN
GA20W_d20_CACCAGGGTATTCTCT-1	5114	2664	GA20W_d20	d20	Cortex	Week_20	scRNA_5end_R2_only	Human_Neuron	2.49913	2	2	IN
GA20W_d20_CACCAGGGTCAAACTC-1	8078	3957	GA20W_d20	d20	Cortex	Week_20	scRNA_5end_R2_only	Human_Neuron	0.996834	0	0	EN
GA20W_d20_CACCAGGTCACAGGCC-1	5588	2762	GA20W_d20	d20	Cortex	Week_20	scRNA_5end_R2_only	Human_Neuron	1.80038	2	2	IN
GA20W_d20_CACCAGGTCGCAAGCC-1	13920	4798	GA20W_d20	d20	Cortex	Week_20	scRNA_5end_R2_only	Human_Neuron	2.60457	7	7	ASCL1+ IPC
GA20W_d20_CACCAGGTCTCGCTTG-1	14097	4612	GA20W_d20	d20	Cortex	Week_20	scRNA_5end_R2_only	Human_Neuron	1.87193	5	5	IN_Precursor
GA20W_d20_CACCTTGAGAAGGCCT-1	34910	7585	GA20W_d20	d20	Cortex	Week_20	scRNA_5end_R2_only	Human_Neuron	1.19498	13	13	Oligo
GA20W_d20_CACCTTGAGACCGGAT-1	4346	2541	GA20W_d20	d20	Cortex	Week_20	scRNA_5end_R2_only	Human_Neuron	1.88516	2	2	IN
GA20W_d20_CACCTTGAGATACACA-1	2744	1751	GA20W_d20	d20	Cortex	Week_20	scRNA_5end_R2_only	Human_Neuron	0.453911	4	4	IN
GA20W_d20_CACCTTGAGCTAAACA-1	1297	1083	GA20W_d20	d20	Cortex	Week_20	scRNA_5end_R2_only	Human_Neuron	14.0984	15	15	Astro
GA20W_d20_CACCTTGAGGAACTGC-1	14823	4944	GA20W_d20	d20	Cortex	Week_20	scRNA_5end_R2_only	Human_Neuron	1.88748	7	7	ASCL1+ IPC
GA20W_d20_CACCTTGAGTGAAGTT-1	6350	3228	GA20W_d20	d20	Cortex	Week_20	scRNA_5end_R2_only	Human_Neuron	2.54237	1	1	EN
GA20W_d20_CACCTTGAGTGTACTC-1	2387	1556	GA20W_d20	d20	Cortex	Week_20	scRNA_5end_R2_only	Human_Neuron	3.25139	4	4	IN
GA20W_d20_CACCTTGCACATCCGG-1	8449	3544	GA20W_d20	d20	Cortex	Week_20	scRNA_5end_R2_only	Human_Neuron	1.76261	3	3	EOMES+ IPC
GA20W_d20_CACCTTGCACATGGGA-1	31261	7333	GA20W_d20	d20	Cortex	Week_20	scRNA_5end_R2_only	Human_Neuron	2.31664	7	7	ASCL1+ IPC
GA20W_d20_CACCTTGCACTGTTAG-1	11396	4415	GA20W_d20	d20	Cortex	Week_20	scRNA_5end_R2_only	Human_Neuron	0.27667	0	0	EN
GA20W_d20_CACCTTGCATGGTCAT-1	15020	5172	GA20W_d20	d20	Cortex	Week_20	scRNA_5end_R2_only	Human_Neuron	1.97683	4	4	IN
GA20W_d20_CACCTTGCATTAACCG-1	11236	4512	GA20W_d20	d20	Cortex	Week_20	scRNA_5end_R2_only	Human_Neuron	1.04426	2	2	IN
GA20W_d20_CACCTTGGTCAGCTAT-1	12724	4700	GA20W_d20	d20	Cortex	Week_20	scRNA_5end_R2_only	Human_Neuron	2.41502	9	9	RG
GA20W_d20_CACCTTGGTGCAGTAG-1	977	701	GA20W_d20	d20	Cortex	Week_20	scRNA_5end_R2_only	Human_Neuron	1.6	6	6	IN
GA20W_d20_CACCTTGGTTAAGGGC-1	816	641	GA20W_d20	d20	Cortex	Week_20	scRNA_5end_R2_only	Human_Neuron	19.7674	12	12	EN
GA20W_d20_CACCTTGGTTAGATGA-1	5532	2963	GA20W_d20	d20	Cortex	Week_20	scRNA_5end_R2_only	Human_Neuron	1.37736	4	4	IN
GA20W_d20_CACCTTGGTTTGTTTC-1	17073	5765	GA20W_d20	d20	Cortex	Week_20	scRNA_5end_R2_only	Human_Neuron	2.04525	3	3	EOMES+ IPC
GA20W_d20_CACCTTGTCCTTTCTC-1	4322	2449	GA20W_d20	d20	Cortex	Week_20	scRNA_5end_R2_only	Human_Neuron	0.858279	4	4	IN
GA20W_d20_CACCTTGTCGCAAGCC-1	3369	2027	GA20W_d20	d20	Cortex	Week_20	scRNA_5end_R2_only	Human_Neuron	2.37251	4	4	IN
GA20W_d20_CACCTTGTCGCGATCG-1	13397	4440	GA20W_d20	d20	Cortex	Week_20	scRNA_5end_R2_only	Human_Neuron	1.73861	5	5	IN_Precursor
GA20W_d20_CACTCCAAGACACTAA-1	37306	7813	GA20W_d20	d20	Cortex	Week_20	scRNA_5end_R2_only	Human_Neuron	1.25247	5	5	IN_Precursor
GA20W_d20_CACTCCAAGAGGTTAT-1	14122	5083	GA20W_d20	d20	Cortex	Week_20	scRNA_5end_R2_only	Human_Neuron	3.6784	9	9	RG
GA20W_d20_CACTCCAAGCGTTGCC-1	6224	2979	GA20W_d20	d20	Cortex	Week_20	scRNA_5end_R2_only	Human_Neuron	2.15817	4	4	IN
GA20W_d20_CACTCCAAGGGATACC-1	5855	2735	GA20W_d20	d20	Cortex	Week_20	scRNA_5end_R2_only	Human_Neuron	2.1553	2	2	IN
GA20W_d20_CACTCCAAGTTAAGTG-1	17047	5693	GA20W_d20	d20	Cortex	Week_20	scRNA_5end_R2_only	Human_Neuron	2.59597	7	7	ASCL1+ IPC
GA20W_d20_CACTCCACACTCGACG-1	13250	4856	GA20W_d20	d20	Cortex	Week_20	scRNA_5end_R2_only	Human_Neuron	1.77929	4	4	IN
GA20W_d20_CACTCCAGTAATCGTC-1	14315	4997	GA20W_d20	d20	Cortex	Week_20	scRNA_5end_R2_only	Human_Neuron	1.81307	5	5	IN_Precursor
GA20W_d20_CACTCCAGTAGAAGGA-1	2383	1654	GA20W_d20	d20	Cortex	Week_20	scRNA_5end_R2_only	Human_Neuron	16.2548	15	15	Astro
GA20W_d20_CACTCCAGTCTCACCT-1	22448	6451	GA20W_d20	d20	Cortex	Week_20	scRNA_5end_R2_only	Human_Neuron	1.80109	7	7	ASCL1+ IPC
GA20W_d20_CACTCCAGTGAAGGCT-1	15134	4782	GA20W_d20	d20	Cortex	Week_20	scRNA_5end_R2_only	Human_Neuron	1.53337	8	8	IN_Precursor
GA20W_d20_CACTCCAGTTTGTTGG-1	5328	2734	GA20W_d20	d20	Cortex	Week_20	scRNA_5end_R2_only	Human_Neuron	2.52459	2	2	IN
GA20W_d20_CACTCCATCAGTTAGC-1	15370	5329	GA20W_d20	d20	Cortex	Week_20	scRNA_5end_R2_only	Human_Neuron	0.849193	18	18	EN
GA20W_d20_CACTCCATCATCGATG-1	9007	4065	GA20W_d20	d20	Cortex	Week_20	scRNA_5end_R2_only	Human_Neuron	1.46583	0	0	EN
GA20W_d20_CACTCCATCGGTCTAA-1	5254	2825	GA20W_d20	d20	Cortex	Week_20	scRNA_5end_R2_only	Human_Neuron	1.98385	2	2	IN
GA20W_d20_CACTCCATCTATCGCC-1	12832	4538	GA20W_d20	d20	Cortex	Week_20	scRNA_5end_R2_only	Human_Neuron	5.98558	11	11	EN
GA20W_d20_CACTCCATCTGTCCGT-1	7966	3882	GA20W_d20	d20	Cortex	Week_20	scRNA_5end_R2_only	Human_Neuron	2.60232	0	0	EN
GA20W_d20_CAGAATCAGCACCGTC-1	9544	3831	GA20W_d20	d20	Cortex	Week_20	scRNA_5end_R2_only	Human_Neuron	0.606772	5	5	IN_Precursor
GA20W_d20_CAGAATCCAATAGCGG-1	8807	4018	GA20W_d20	d20	Cortex	Week_20	scRNA_5end_R2_only	Human_Neuron	2.36744	17	17	IN
GA20W_d20_CAGAATCGTCTAGTCA-1	14237	4995	GA20W_d20	d20	Cortex	Week_20	scRNA_5end_R2_only	Human_Neuron	1.5807	5	5	IN_Precursor
GA20W_d20_CAGAATCGTCTGCAAT-1	5822	2791	GA20W_d20	d20	Cortex	Week_20	scRNA_5end_R2_only	Human_Neuron	2.03341	2	2	IN
GA20W_d20_CAGAATCTCCACGTGG-1	5478	2636	GA20W_d20	d20	Cortex	Week_20	scRNA_5end_R2_only	Human_Neuron	1.91052	2	2	IN
GA20W_d20_CAGAGAGAGCACCGCT-1	5756	2844	GA20W_d20	d20	Cortex	Week_20	scRNA_5end_R2_only	Human_Neuron	0.315353	0	0	EN
GA20W_d20_CAGAGAGAGGTTACCT-1	11798	4358	GA20W_d20	d20	Cortex	Week_20	scRNA_5end_R2_only	Human_Neuron	1.08611	8	8	IN_Precursor
GA20W_d20_CAGAGAGCAAAGCGGT-1	9638	3774	GA20W_d20	d20	Cortex	Week_20	scRNA_5end_R2_only	Human_Neuron	1.47259	2	2	IN
GA20W_d20_CAGAGAGCAAGAAAGG-1	9109	3805	GA20W_d20	d20	Cortex	Week_20	scRNA_5end_R2_only	Human_Neuron	2.75357	10	10	IN
GA20W_d20_CAGAGAGCAATCACAC-1	4021	2234	GA20W_d20	d20	Cortex	Week_20	scRNA_5end_R2_only	Human_Neuron	2.07301	2	2	IN
GA20W_d20_CAGAGAGCAGCCACCA-1	2355	1664	GA20W_d20	d20	Cortex	Week_20	scRNA_5end_R2_only	Human_Neuron	6.88984	17	17	IN
GA20W_d20_CAGAGAGCATCTATGG-1	6277	3100	GA20W_d20	d20	Cortex	Week_20	scRNA_5end_R2_only	Human_Neuron	1.89405	2	2	IN
GA20W_d20_CAGAGAGGTACCGAGA-1	18413	5827	GA20W_d20	d20	Cortex	Week_20	scRNA_5end_R2_only	Human_Neuron	1.60629	5	5	IN_Precursor
GA20W_d20_CAGAGAGGTCTAAACC-1	535	437	GA20W_d20	d20	Cortex	Week_20	scRNA_5end_R2_only	Human_Neuron	12.2349	6	6	IN
GA20W_d20_CAGAGAGGTGAAAGAG-1	7950	3297	GA20W_d20	d20	Cortex	Week_20	scRNA_5end_R2_only	Human_Neuron	2.47108	10	10	IN
GA20W_d20_CAGAGAGGTTCAGCGC-1	8868	3772	GA20W_d20	d20	Cortex	Week_20	scRNA_5end_R2_only	Human_Neuron	2.22019	10	10	IN
GA20W_d20_CAGAGAGTCCGTACAA-1	8109	3483	GA20W_d20	d20	Cortex	Week_20	scRNA_5end_R2_only	Human_Neuron	0.933861	2	2	IN
GA20W_d20_CAGAGAGTCGACCAGC-1	838	670	GA20W_d20	d20	Cortex	Week_20	scRNA_5end_R2_only	Human_Neuron	1.39211	6	6	IN
GA20W_d20_CAGAGAGTCTCACATT-1	25845	6538	GA20W_d20	d20	Cortex	Week_20	scRNA_5end_R2_only	Human_Neuron	2.28929	7	7	ASCL1+ IPC
GA20W_d20_CAGATCAAGGCCGAAT-1	6701	3036	GA20W_d20	d20	Cortex	Week_20	scRNA_5end_R2_only	Human_Neuron	2.22601	2	2	IN
GA20W_d20_CAGATCAAGTAAGTAC-1	24284	6081	GA20W_d20	d20	Cortex	Week_20	scRNA_5end_R2_only	Human_Neuron	2.77902	8	8	IN_Precursor
GA20W_d20_CAGATCACAATCCGAT-1	868	671	GA20W_d20	d20	Cortex	Week_20	scRNA_5end_R2_only	Human_Neuron	11.0668	6	6	IN
GA20W_d20_CAGATCACAGACGCTC-1	743	604	GA20W_d20	d20	Cortex	Week_20	scRNA_5end_R2_only	Human_Neuron	0	6	6	IN
GA20W_d20_CAGATCAGTGTAACGG-1	7193	3466	GA20W_d20	d20	Cortex	Week_20	scRNA_5end_R2_only	Human_Neuron	1.39523	1	1	EN
GA20W_d20_CAGATCATCATTCACT-1	23257	6119	GA20W_d20	d20	Cortex	Week_20	scRNA_5end_R2_only	Human_Neuron	2.39108	4	4	IN
GA20W_d20_CAGATCATCCCAAGTA-1	11192	4331	GA20W_d20	d20	Cortex	Week_20	scRNA_5end_R2_only	Human_Neuron	3.24983	7	7	ASCL1+ IPC
GA20W_d20_CAGATCATCTTCGAGA-1	555	440	GA20W_d20	d20	Cortex	Week_20	scRNA_5end_R2_only	Human_Neuron	16.0294	6	6	IN
GA20W_d20_CAGCAGCAGGTCATCT-1	8426	3623	GA20W_d20	d20	Cortex	Week_20	scRNA_5end_R2_only	Human_Neuron	3.46182	10	10	IN
GA20W_d20_CAGCAGCAGTGTTTGC-1	9161	3597	GA20W_d20	d20	Cortex	Week_20	scRNA_5end_R2_only	Human_Neuron	1.154	8	8	IN_Precursor
GA20W_d20_CAGCAGCCACGGATAG-1	4449	2434	GA20W_d20	d20	Cortex	Week_20	scRNA_5end_R2_only	Human_Neuron	1.48193	2	2	IN
GA20W_d20_CAGCAGCGTAGCACGA-1	10513	4295	GA20W_d20	d20	Cortex	Week_20	scRNA_5end_R2_only	Human_Neuron	1.63892	4	4	IN
GA20W_d20_CAGCAGCGTCTAGTGT-1	8057	3589	GA20W_d20	d20	Cortex	Week_20	scRNA_5end_R2_only	Human_Neuron	2.50884	3	3	EOMES+ IPC
GA20W_d20_CAGCAGCGTGCACCAC-1	5396	2653	GA20W_d20	d20	Cortex	Week_20	scRNA_5end_R2_only	Human_Neuron	2.46227	2	2	IN
GA20W_d20_CAGCAGCGTGTTGAGG-1	2314	1573	GA20W_d20	d20	Cortex	Week_20	scRNA_5end_R2_only	Human_Neuron	2.78114	4	4	IN
GA20W_d20_CAGCAGCTCAAGAAGT-1	1408	1024	GA20W_d20	d20	Cortex	Week_20	scRNA_5end_R2_only	Human_Neuron	0	15	15	Astro
GA20W_d20_CAGCAGCTCCATGAAC-1	7483	3527	GA20W_d20	d20	Cortex	Week_20	scRNA_5end_R2_only	Human_Neuron	0.738552	2	2	IN
GA20W_d20_CAGCATAAGTGGGCTA-1	16512	5416	GA20W_d20	d20	Cortex	Week_20	scRNA_5end_R2_only	Human_Neuron	2.07656	4	4	IN
GA20W_d20_CAGCATACACGGATAG-1	6659	3369	GA20W_d20	d20	Cortex	Week_20	scRNA_5end_R2_only	Human_Neuron	4.39499	14	14	Astro
GA20W_d20_CAGCATACAGATCCAT-1	7059	3119	GA20W_d20	d20	Cortex	Week_20	scRNA_5end_R2_only	Human_Neuron	3.45198	2	2	IN
GA20W_d20_CAGCATAGTGTTTGGT-1	15284	5001	GA20W_d20	d20	Cortex	Week_20	scRNA_5end_R2_only	Human_Neuron	1.85089	4	4	IN
GA20W_d20_CAGCATAGTTGGGACA-1	34711	7360	GA20W_d20	d20	Cortex	Week_20	scRNA_5end_R2_only	Human_Neuron	2.41127	8	8	IN_Precursor
GA20W_d20_CAGCCGAAGAGGTTAT-1	5581	2754	GA20W_d20	d20	Cortex	Week_20	scRNA_5end_R2_only	Human_Neuron	2.19117	2	2	IN
GA20W_d20_CAGCCGAAGCGCCTTG-1	3505	2168	GA20W_d20	d20	Cortex	Week_20	scRNA_5end_R2_only	Human_Neuron	0.363825	4	4	IN
GA20W_d20_CAGCCGACAGGTGCCT-1	3436	2246	GA20W_d20	d20	Cortex	Week_20	scRNA_5end_R2_only	Human_Neuron	0.667408	1	1	EN
GA20W_d20_CAGCCGAGTCTAGCGC-1	12555	4555	GA20W_d20	d20	Cortex	Week_20	scRNA_5end_R2_only	Human_Neuron	1.29908	0	0	EN
GA20W_d20_CAGCCGAGTCTTGATG-1	2480	1712	GA20W_d20	d20	Cortex	Week_20	scRNA_5end_R2_only	Human_Neuron	3.71933	4	4	IN
GA20W_d20_CAGCCGAGTGCGATAG-1	16205	4911	GA20W_d20	d20	Cortex	Week_20	scRNA_5end_R2_only	Human_Neuron	0.530893	5	5	IN_Precursor
GA20W_d20_CAGCCGAGTGTTTGGT-1	11786	4591	GA20W_d20	d20	Cortex	Week_20	scRNA_5end_R2_only	Human_Neuron	2.03817	0	0	EN
GA20W_d20_CAGCCGAGTTGTCGCG-1	13445	4559	GA20W_d20	d20	Cortex	Week_20	scRNA_5end_R2_only	Human_Neuron	0.446459	11	11	EN
GA20W_d20_CAGCCGATCCTTTCTC-1	8601	3973	GA20W_d20	d20	Cortex	Week_20	scRNA_5end_R2_only	Human_Neuron	0.869019	2	2	IN
GA20W_d20_CAGCGACAGTGGTAGC-1	9970	3982	GA20W_d20	d20	Cortex	Week_20	scRNA_5end_R2_only	Human_Neuron	2.14558	2	2	IN
GA20W_d20_CAGCGACCACGCCAGT-1	674	563	GA20W_d20	d20	Cortex	Week_20	scRNA_5end_R2_only	Human_Neuron	9.59079	6	6	IN
GA20W_d20_CAGCGACCACGGTTTA-1	7706	3700	GA20W_d20	d20	Cortex	Week_20	scRNA_5end_R2_only	Human_Neuron	0.96728	0	0	EN
GA20W_d20_CAGCGACCAGACGCTC-1	6899	3236	GA20W_d20	d20	Cortex	Week_20	scRNA_5end_R2_only	Human_Neuron	0.310391	1	1	EN
GA20W_d20_CAGCGACCAGCCTATA-1	2287	1490	GA20W_d20	d20	Cortex	Week_20	scRNA_5end_R2_only	Human_Neuron	4.16835	4	4	IN
GA20W_d20_CAGCGACTCATCTGTT-1	6747	3369	GA20W_d20	d20	Cortex	Week_20	scRNA_5end_R2_only	Human_Neuron	1.1239	3	3	EOMES+ IPC
GA20W_d20_CAGCGACTCTTGAGAC-1	3703	2225	GA20W_d20	d20	Cortex	Week_20	scRNA_5end_R2_only	Human_Neuron	0.567201	2	2	IN
GA20W_d20_CAGCGACTCTTGCCGT-1	14720	4780	GA20W_d20	d20	Cortex	Week_20	scRNA_5end_R2_only	Human_Neuron	1.66955	8	8	IN_Precursor
GA20W_d20_CAGCTAAAGATACACA-1	9206	3850	GA20W_d20	d20	Cortex	Week_20	scRNA_5end_R2_only	Human_Neuron	1.52324	10	10	IN
GA20W_d20_CAGCTAAAGGACAGAA-1	6969	3126	GA20W_d20	d20	Cortex	Week_20	scRNA_5end_R2_only	Human_Neuron	1.99389	3	3	EOMES+ IPC
GA20W_d20_CAGCTAAAGGCTAGAC-1	6867	3448	GA20W_d20	d20	Cortex	Week_20	scRNA_5end_R2_only	Human_Neuron	4.0433	0	0	EN
GA20W_d20_CAGCTAACACAACTGT-1	4827	2656	GA20W_d20	d20	Cortex	Week_20	scRNA_5end_R2_only	Human_Neuron	2.23979	2	2	IN
GA20W_d20_CAGCTAACAGCCTATA-1	551	465	GA20W_d20	d20	Cortex	Week_20	scRNA_5end_R2_only	Human_Neuron	0	6	6	IN
GA20W_d20_CAGCTAACATAAAGGT-1	4402	2521	GA20W_d20	d20	Cortex	Week_20	scRNA_5end_R2_only	Human_Neuron	0.106769	3	3	EOMES+ IPC
GA20W_d20_CAGCTAACATGGGAAC-1	5983	3051	GA20W_d20	d20	Cortex	Week_20	scRNA_5end_R2_only	Human_Neuron	0.884811	0	0	EN
GA20W_d20_CAGCTAACATTCCTGC-1	4617	2579	GA20W_d20	d20	Cortex	Week_20	scRNA_5end_R2_only	Human_Neuron	1.15099	2	2	IN
GA20W_d20_CAGCTAAGTCGCGGTT-1	9212	3748	GA20W_d20	d20	Cortex	Week_20	scRNA_5end_R2_only	Human_Neuron	1.87363	2	2	IN
GA20W_d20_CAGCTAATCACAAACC-1	1148	935	GA20W_d20	d20	Cortex	Week_20	scRNA_5end_R2_only	Human_Neuron	3.10403	15	15	Astro
GA20W_d20_CAGCTAATCATGCATG-1	10808	4265	GA20W_d20	d20	Cortex	Week_20	scRNA_5end_R2_only	Human_Neuron	2.90839	7	7	ASCL1+ IPC
GA20W_d20_CAGCTAATCCTAGTGA-1	26258	7254	GA20W_d20	d20	Cortex	Week_20	scRNA_5end_R2_only	Human_Neuron	5.40733	11	11	EN
GA20W_d20_CAGCTAATCGACAGCC-1	5386	2803	GA20W_d20	d20	Cortex	Week_20	scRNA_5end_R2_only	Human_Neuron	2.59126	3	3	EOMES+ IPC
GA20W_d20_CAGCTAATCGTGGGAA-1	21612	5738	GA20W_d20	d20	Cortex	Week_20	scRNA_5end_R2_only	Human_Neuron	2.00486	8	8	IN_Precursor
GA20W_d20_CAGCTGGAGAGGTACC-1	4239	2272	GA20W_d20	d20	Cortex	Week_20	scRNA_5end_R2_only	Human_Neuron	1.1134	3	3	EOMES+ IPC
GA20W_d20_CAGCTGGCAAGCCATT-1	1415	1001	GA20W_d20	d20	Cortex	Week_20	scRNA_5end_R2_only	Human_Neuron	0	6	6	IN
GA20W_d20_CAGCTGGCAATCACAC-1	2628	1714	GA20W_d20	d20	Cortex	Week_20	scRNA_5end_R2_only	Human_Neuron	3.6306	4	4	IN
GA20W_d20_CAGCTGGCACACCGCA-1	5923	2832	GA20W_d20	d20	Cortex	Week_20	scRNA_5end_R2_only	Human_Neuron	0.947796	4	4	IN
GA20W_d20_CAGCTGGCACCTTGTC-1	5338	2610	GA20W_d20	d20	Cortex	Week_20	scRNA_5end_R2_only	Human_Neuron	1.04272	2	2	IN
GA20W_d20_CAGCTGGCAGCCTGTG-1	10252	4139	GA20W_d20	d20	Cortex	Week_20	scRNA_5end_R2_only	Human_Neuron	1.34216	5	5	IN_Precursor
GA20W_d20_CAGCTGGCAGTTCATG-1	11017	4031	GA20W_d20	d20	Cortex	Week_20	scRNA_5end_R2_only	Human_Neuron	2.45419	5	5	IN_Precursor
GA20W_d20_CAGCTGGTCCCTAATT-1	16828	5286	GA20W_d20	d20	Cortex	Week_20	scRNA_5end_R2_only	Human_Neuron	2.16897	7	7	ASCL1+ IPC
GA20W_d20_CAGCTGGTCTAGCACA-1	15369	5336	GA20W_d20	d20	Cortex	Week_20	scRNA_5end_R2_only	Human_Neuron	1.69612	1	1	EN
GA20W_d20_CAGCTGGTCTCCTATA-1	4665	2613	GA20W_d20	d20	Cortex	Week_20	scRNA_5end_R2_only	Human_Neuron	3.77358	2	2	IN
GA20W_d20_CAGCTGGTCTCTAAGG-1	12889	4903	GA20W_d20	d20	Cortex	Week_20	scRNA_5end_R2_only	Human_Neuron	0.476775	11	11	EN
GA20W_d20_CAGGTGCAGAAAGTGG-1	777	621	GA20W_d20	d20	Cortex	Week_20	scRNA_5end_R2_only	Human_Neuron	7.2104	6	6	IN
GA20W_d20_CAGGTGCAGACCTAGG-1	3169	1903	GA20W_d20	d20	Cortex	Week_20	scRNA_5end_R2_only	Human_Neuron	0.526008	4	4	IN
GA20W_d20_CAGGTGCCAGAGTGTG-1	2924	1871	GA20W_d20	d20	Cortex	Week_20	scRNA_5end_R2_only	Human_Neuron	1.67722	4	4	IN
GA20W_d20_CAGGTGCCATCCTTGC-1	13802	4879	GA20W_d20	d20	Cortex	Week_20	scRNA_5end_R2_only	Human_Neuron	1.75094	9	9	RG
GA20W_d20_CAGGTGCCATCGGACC-1	5706	2799	GA20W_d20	d20	Cortex	Week_20	scRNA_5end_R2_only	Human_Neuron	2.29685	3	3	EOMES+ IPC
GA20W_d20_CAGGTGCGTATAATGG-1	4512	2468	GA20W_d20	d20	Cortex	Week_20	scRNA_5end_R2_only	Human_Neuron	1.28258	2	2	IN
GA20W_d20_CAGGTGCGTATTCGTG-1	9024	3941	GA20W_d20	d20	Cortex	Week_20	scRNA_5end_R2_only	Human_Neuron	2.5621	13	13	Oligo
GA20W_d20_CAGGTGCGTGTATGGG-1	3825	2248	GA20W_d20	d20	Cortex	Week_20	scRNA_5end_R2_only	Human_Neuron	1.78784	4	4	IN
GA20W_d20_CAGGTGCGTTCGGCAC-1	6078	3036	GA20W_d20	d20	Cortex	Week_20	scRNA_5end_R2_only	Human_Neuron	1.62544	9	9	RG
GA20W_d20_CAGGTGCTCACTCCTG-1	4257	2448	GA20W_d20	d20	Cortex	Week_20	scRNA_5end_R2_only	Human_Neuron	2.97891	2	2	IN
GA20W_d20_CAGGTGCTCATCTGCC-1	853	676	GA20W_d20	d20	Cortex	Week_20	scRNA_5end_R2_only	Human_Neuron	1.36986	17	17	IN
GA20W_d20_CAGGTGCTCGCGCCAA-1	11368	4387	GA20W_d20	d20	Cortex	Week_20	scRNA_5end_R2_only	Human_Neuron	2.21721	5	5	IN_Precursor
GA20W_d20_CAGGTGCTCTATCGCC-1	3240	2067	GA20W_d20	d20	Cortex	Week_20	scRNA_5end_R2_only	Human_Neuron	0.396488	4	4	IN
GA20W_d20_CAGGTGCTCTATGTGG-1	509	393	GA20W_d20	d20	Cortex	Week_20	scRNA_5end_R2_only	Human_Neuron	0	16	16	RG
GA20W_d20_CAGGTGCTCTTGAGGT-1	13510	5006	GA20W_d20	d20	Cortex	Week_20	scRNA_5end_R2_only	Human_Neuron	1.24421	18	18	EN
GA20W_d20_CAGTAACAGAATTGTG-1	22850	6251	GA20W_d20	d20	Cortex	Week_20	scRNA_5end_R2_only	Human_Neuron	2.12642	7	7	ASCL1+ IPC
GA20W_d20_CAGTAACAGCGATATA-1	4941	2450	GA20W_d20	d20	Cortex	Week_20	scRNA_5end_R2_only	Human_Neuron	1.77305	2	2	IN
GA20W_d20_CAGTAACAGTTTAGGA-1	7985	3153	GA20W_d20	d20	Cortex	Week_20	scRNA_5end_R2_only	Human_Neuron	0.934364	8	8	IN_Precursor
GA20W_d20_CAGTAACCAATTCCTT-1	1143	877	GA20W_d20	d20	Cortex	Week_20	scRNA_5end_R2_only	Human_Neuron	16.4136	15	15	Astro
GA20W_d20_CAGTAACCACCCATGG-1	6864	3258	GA20W_d20	d20	Cortex	Week_20	scRNA_5end_R2_only	Human_Neuron	1.78886	7	7	ASCL1+ IPC
GA20W_d20_CAGTAACCACTTAACG-1	3948	2307	GA20W_d20	d20	Cortex	Week_20	scRNA_5end_R2_only	Human_Neuron	0.728041	2	2	IN
GA20W_d20_CAGTAACGTCAGAGGT-1	4643	2541	GA20W_d20	d20	Cortex	Week_20	scRNA_5end_R2_only	Human_Neuron	3.51661	1	1	EN
GA20W_d20_CAGTAACTCGCCAAAT-1	16982	5577	GA20W_d20	d20	Cortex	Week_20	scRNA_5end_R2_only	Human_Neuron	1.64291	2	2	IN
GA20W_d20_CAGTAACTCGGCGCAT-1	5451	2881	GA20W_d20	d20	Cortex	Week_20	scRNA_5end_R2_only	Human_Neuron	1.00034	1	1	EN
GA20W_d20_CAGTCCTAGCACAGGT-1	5857	2859	GA20W_d20	d20	Cortex	Week_20	scRNA_5end_R2_only	Human_Neuron	2.77861	2	2	IN
GA20W_d20_CAGTCCTAGCCACTAT-1	11924	4760	GA20W_d20	d20	Cortex	Week_20	scRNA_5end_R2_only	Human_Neuron	0.545384	0	0	EN
GA20W_d20_CAGTCCTCACTTCGAA-1	21035	6100	GA20W_d20	d20	Cortex	Week_20	scRNA_5end_R2_only	Human_Neuron	0.27541	11	11	EN
GA20W_d20_CAGTCCTCAGGGCATA-1	7911	3469	GA20W_d20	d20	Cortex	Week_20	scRNA_5end_R2_only	Human_Neuron	2.16039	2	2	IN
GA20W_d20_CAGTCCTGTACGAAAT-1	14779	5192	GA20W_d20	d20	Cortex	Week_20	scRNA_5end_R2_only	Human_Neuron	2.24767	4	4	IN
GA20W_d20_CAGTCCTGTCTAAACC-1	9061	3723	GA20W_d20	d20	Cortex	Week_20	scRNA_5end_R2_only	Human_Neuron	1.49961	4	4	IN
GA20W_d20_CAGTCCTTCCTTGCCA-1	8793	3768	GA20W_d20	d20	Cortex	Week_20	scRNA_5end_R2_only	Human_Neuron	1.19921	10	10	IN
GA20W_d20_CAGTCCTTCGGCGCTA-1	2418	1753	GA20W_d20	d20	Cortex	Week_20	scRNA_5end_R2_only	Human_Neuron	16.774	7	7	ASCL1+ IPC
GA20W_d20_CAGTCCTTCTAACTCT-1	12238	4697	GA20W_d20	d20	Cortex	Week_20	scRNA_5end_R2_only	Human_Neuron	2.67767	10	10	IN
GA20W_d20_CATATGGAGAACAACT-1	8571	3572	GA20W_d20	d20	Cortex	Week_20	scRNA_5end_R2_only	Human_Neuron	3.81347	9	9	RG
GA20W_d20_CATATGGCACCCATGG-1	941	697	GA20W_d20	d20	Cortex	Week_20	scRNA_5end_R2_only	Human_Neuron	8.42912	6	6	IN
GA20W_d20_CATATGGCATAACCTG-1	7511	3263	GA20W_d20	d20	Cortex	Week_20	scRNA_5end_R2_only	Human_Neuron	2.09463	5	5	IN_Precursor
GA20W_d20_CATATGGCATGTTCCC-1	1622	1214	GA20W_d20	d20	Cortex	Week_20	scRNA_5end_R2_only	Human_Neuron	0.0579374	4	4	IN
GA20W_d20_CATATGGGTCGTTGTA-1	5060	2437	GA20W_d20	d20	Cortex	Week_20	scRNA_5end_R2_only	Human_Neuron	2.93165	3	3	EOMES+ IPC
GA20W_d20_CATATGGGTGTCGCTG-1	10745	4277	GA20W_d20	d20	Cortex	Week_20	scRNA_5end_R2_only	Human_Neuron	2.77949	13	13	Oligo
GA20W_d20_CATATGGTCAGCTGGC-1	6779	3291	GA20W_d20	d20	Cortex	Week_20	scRNA_5end_R2_only	Human_Neuron	2.24869	1	1	EN
GA20W_d20_CATATGGTCTAACTTC-1	3267	1970	GA20W_d20	d20	Cortex	Week_20	scRNA_5end_R2_only	Human_Neuron	1.99487	2	2	IN
GA20W_d20_CATATGGTCTCTGTCG-1	6750	3278	GA20W_d20	d20	Cortex	Week_20	scRNA_5end_R2_only	Human_Neuron	2.41403	3	3	EOMES+ IPC
GA20W_d20_CATATGGTCTGGTATG-1	6523	3391	GA20W_d20	d20	Cortex	Week_20	scRNA_5end_R2_only	Human_Neuron	2.65872	0	0	EN
GA20W_d20_CATATTCAGATACACA-1	1016	778	GA20W_d20	d20	Cortex	Week_20	scRNA_5end_R2_only	Human_Neuron	5.28757	17	17	IN
GA20W_d20_CATATTCAGGTAGCCA-1	42838	8281	GA20W_d20	d20	Cortex	Week_20	scRNA_5end_R2_only	Human_Neuron	2.65184	8	8	IN_Precursor
GA20W_d20_CATATTCCAGATAATG-1	3098	1850	GA20W_d20	d20	Cortex	Week_20	scRNA_5end_R2_only	Human_Neuron	4.63811	2	2	IN
GA20W_d20_CATATTCCAGGACCCT-1	13885	4928	GA20W_d20	d20	Cortex	Week_20	scRNA_5end_R2_only	Human_Neuron	2.98171	7	7	ASCL1+ IPC
GA20W_d20_CATATTCGTATCAGTC-1	18401	5914	GA20W_d20	d20	Cortex	Week_20	scRNA_5end_R2_only	Human_Neuron	3.49375	7	7	ASCL1+ IPC
GA20W_d20_CATATTCTCCAAGTAC-1	473	392	GA20W_d20	d20	Cortex	Week_20	scRNA_5end_R2_only	Human_Neuron	5.99613	6	6	IN
GA20W_d20_CATATTCTCCACGACG-1	3391	1856	GA20W_d20	d20	Cortex	Week_20	scRNA_5end_R2_only	Human_Neuron	2.52698	0	0	EN
GA20W_d20_CATATTCTCTTTAGTC-1	10060	4439	GA20W_d20	d20	Cortex	Week_20	scRNA_5end_R2_only	Human_Neuron	0.466331	0	0	EN
GA20W_d20_CATCAAGAGAGGACGG-1	2081	1407	GA20W_d20	d20	Cortex	Week_20	scRNA_5end_R2_only	Human_Neuron	19.528	15	15	Astro
GA20W_d20_CATCAAGCAAGGTTTC-1	5998	3121	GA20W_d20	d20	Cortex	Week_20	scRNA_5end_R2_only	Human_Neuron	3.10856	0	0	EN
GA20W_d20_CATCAAGCACGCTTTC-1	30921	7320	GA20W_d20	d20	Cortex	Week_20	scRNA_5end_R2_only	Human_Neuron	0.308411	8	8	IN_Precursor
GA20W_d20_CATCAAGGTATGAAAC-1	8115	3589	GA20W_d20	d20	Cortex	Week_20	scRNA_5end_R2_only	Human_Neuron	4.42506	3	3	EOMES+ IPC
GA20W_d20_CATCAAGGTCAGATAA-1	22448	5827	GA20W_d20	d20	Cortex	Week_20	scRNA_5end_R2_only	Human_Neuron	1.23517	8	8	IN_Precursor
GA20W_d20_CATCAAGGTCATCGGC-1	12883	4695	GA20W_d20	d20	Cortex	Week_20	scRNA_5end_R2_only	Human_Neuron	2.6047	9	9	RG
GA20W_d20_CATCAAGTCCGTCATC-1	4389	2296	GA20W_d20	d20	Cortex	Week_20	scRNA_5end_R2_only	Human_Neuron	0.495868	1	1	EN
GA20W_d20_CATCAAGTCTTACCTA-1	27693	6695	GA20W_d20	d20	Cortex	Week_20	scRNA_5end_R2_only	Human_Neuron	1.37708	7	7	ASCL1+ IPC
GA20W_d20_CATCAGAAGACAAGCC-1	7544	3299	GA20W_d20	d20	Cortex	Week_20	scRNA_5end_R2_only	Human_Neuron	2.53946	10	10	IN
GA20W_d20_CATCAGAAGATCCCGC-1	2089	1428	GA20W_d20	d20	Cortex	Week_20	scRNA_5end_R2_only	Human_Neuron	2.51142	4	4	IN
GA20W_d20_CATCAGAAGCGTGAGT-1	5781	3089	GA20W_d20	d20	Cortex	Week_20	scRNA_5end_R2_only	Human_Neuron	0.0665004	0	0	EN
GA20W_d20_CATCAGAAGCTATGCT-1	1356	1018	GA20W_d20	d20	Cortex	Week_20	scRNA_5end_R2_only	Human_Neuron	19.1901	14	14	Astro
GA20W_d20_CATCAGAAGGATGGTC-1	6850	3381	GA20W_d20	d20	Cortex	Week_20	scRNA_5end_R2_only	Human_Neuron	2.3819	1	1	EN
GA20W_d20_CATCAGAAGGTGCAAC-1	2036	1440	GA20W_d20	d20	Cortex	Week_20	scRNA_5end_R2_only	Human_Neuron	12.8205	15	15	Astro
GA20W_d20_CATCAGACAAGGACTG-1	19395	5931	GA20W_d20	d20	Cortex	Week_20	scRNA_5end_R2_only	Human_Neuron	2.65532	13	13	Oligo
GA20W_d20_CATCAGACAAGGCTCC-1	3437	2181	GA20W_d20	d20	Cortex	Week_20	scRNA_5end_R2_only	Human_Neuron	0.373456	0	0	EN
GA20W_d20_CATCAGACACCCATTC-1	21989	5792	GA20W_d20	d20	Cortex	Week_20	scRNA_5end_R2_only	Human_Neuron	1.44317	7	7	ASCL1+ IPC
GA20W_d20_CATCAGACAGGGCATA-1	3847	2198	GA20W_d20	d20	Cortex	Week_20	scRNA_5end_R2_only	Human_Neuron	1.85615	2	2	IN
GA20W_d20_CATCAGAGTAAACCTC-1	18943	5484	GA20W_d20	d20	Cortex	Week_20	scRNA_5end_R2_only	Human_Neuron	1.56391	8	8	IN_Precursor
GA20W_d20_CATCAGAGTACACCGC-1	5600	3029	GA20W_d20	d20	Cortex	Week_20	scRNA_5end_R2_only	Human_Neuron	1.54139	0	0	EN
GA20W_d20_CATCAGAGTTGTGGAG-1	5681	2812	GA20W_d20	d20	Cortex	Week_20	scRNA_5end_R2_only	Human_Neuron	1.92518	2	2	IN
GA20W_d20_CATCAGATCATCTGCC-1	7878	3637	GA20W_d20	d20	Cortex	Week_20	scRNA_5end_R2_only	Human_Neuron	2.92754	11	11	EN
GA20W_d20_CATCAGATCCGCATAA-1	7468	3450	GA20W_d20	d20	Cortex	Week_20	scRNA_5end_R2_only	Human_Neuron	2.36404	4	4	IN
GA20W_d20_CATCAGATCCTCAATT-1	10852	4217	GA20W_d20	d20	Cortex	Week_20	scRNA_5end_R2_only	Human_Neuron	1.61634	10	10	IN
GA20W_d20_CATCAGATCTCTGTCG-1	6806	3132	GA20W_d20	d20	Cortex	Week_20	scRNA_5end_R2_only	Human_Neuron	2.13178	5	5	IN_Precursor
GA20W_d20_CATCAGATCTTCGGTC-1	21471	6065	GA20W_d20	d20	Cortex	Week_20	scRNA_5end_R2_only	Human_Neuron	1.68269	9	9	RG
GA20W_d20_CATCCACAGAGACGAA-1	15387	4799	GA20W_d20	d20	Cortex	Week_20	scRNA_5end_R2_only	Human_Neuron	1.57396	8	8	IN_Precursor
GA20W_d20_CATCCACAGATATACG-1	7949	3608	GA20W_d20	d20	Cortex	Week_20	scRNA_5end_R2_only	Human_Neuron	1.47493	3	3	EOMES+ IPC
GA20W_d20_CATCCACAGGTTCCTA-1	10824	4280	GA20W_d20	d20	Cortex	Week_20	scRNA_5end_R2_only	Human_Neuron	1.17332	5	5	IN_Precursor
GA20W_d20_CATCCACCACCCAGTG-1	16971	5412	GA20W_d20	d20	Cortex	Week_20	scRNA_5end_R2_only	Human_Neuron	0.599401	8	8	IN_Precursor
GA20W_d20_CATCCACCACTAGTAC-1	8225	3500	GA20W_d20	d20	Cortex	Week_20	scRNA_5end_R2_only	Human_Neuron	0.818856	2	2	IN
GA20W_d20_CATCCACGTAAGTGTA-1	16776	5815	GA20W_d20	d20	Cortex	Week_20	scRNA_5end_R2_only	Human_Neuron	2.72559	7	7	ASCL1+ IPC
GA20W_d20_CATCCACGTGACAAAT-1	7597	3570	GA20W_d20	d20	Cortex	Week_20	scRNA_5end_R2_only	Human_Neuron	6.87528	8	8	IN_Precursor
GA20W_d20_CATCCACTCACATGCA-1	15101	5508	GA20W_d20	d20	Cortex	Week_20	scRNA_5end_R2_only	Human_Neuron	1.01498	13	13	Oligo
GA20W_d20_CATCCACTCGAATGCT-1	16673	5617	GA20W_d20	d20	Cortex	Week_20	scRNA_5end_R2_only	Human_Neuron	1.30447	4	4	IN
GA20W_d20_CATCGAAAGCGATTCT-1	2683	1734	GA20W_d20	d20	Cortex	Week_20	scRNA_5end_R2_only	Human_Neuron	1.26626	4	4	IN
GA20W_d20_CATCGAAAGCTCTCGG-1	26335	6366	GA20W_d20	d20	Cortex	Week_20	scRNA_5end_R2_only	Human_Neuron	1.21555	5	5	IN_Precursor
GA20W_d20_CATCGAACACTATCTT-1	3208	1979	GA20W_d20	d20	Cortex	Week_20	scRNA_5end_R2_only	Human_Neuron	0.0587889	2	2	IN
GA20W_d20_CATCGAACATTATCTC-1	20685	6361	GA20W_d20	d20	Cortex	Week_20	scRNA_5end_R2_only	Human_Neuron	0.414032	11	11	EN
GA20W_d20_CATCGAAGTTGAACTC-1	8067	3622	GA20W_d20	d20	Cortex	Week_20	scRNA_5end_R2_only	Human_Neuron	0.626424	0	0	EN
GA20W_d20_CATCGAATCAGTGCAT-1	14852	5134	GA20W_d20	d20	Cortex	Week_20	scRNA_5end_R2_only	Human_Neuron	1.45548	5	5	IN_Precursor
GA20W_d20_CATCGAATCTGCAAGT-1	2103	1446	GA20W_d20	d20	Cortex	Week_20	scRNA_5end_R2_only	Human_Neuron	1.85269	4	4	IN
GA20W_d20_CATCGAATCTGGCGAC-1	11441	4480	GA20W_d20	d20	Cortex	Week_20	scRNA_5end_R2_only	Human_Neuron	3.1665	13	13	Oligo
GA20W_d20_CATCGGGAGAGTGACC-1	7689	3245	GA20W_d20	d20	Cortex	Week_20	scRNA_5end_R2_only	Human_Neuron	1.66525	9	9	RG
GA20W_d20_CATCGGGAGCGACGTA-1	1470	1090	GA20W_d20	d20	Cortex	Week_20	scRNA_5end_R2_only	Human_Neuron	4.15601	4	4	IN
GA20W_d20_CATCGGGAGCTCCTTC-1	5160	2731	GA20W_d20	d20	Cortex	Week_20	scRNA_5end_R2_only	Human_Neuron	1.14316	4	4	IN
GA20W_d20_CATCGGGCAATCCGAT-1	1048	815	GA20W_d20	d20	Cortex	Week_20	scRNA_5end_R2_only	Human_Neuron	15.5626	6	6	IN
GA20W_d20_CATCGGGGTCGACTGC-1	5518	2696	GA20W_d20	d20	Cortex	Week_20	scRNA_5end_R2_only	Human_Neuron	2.33286	2	2	IN
GA20W_d20_CATCGGGGTTGTCTTT-1	3998	2310	GA20W_d20	d20	Cortex	Week_20	scRNA_5end_R2_only	Human_Neuron	1.28175	4	4	IN
GA20W_d20_CATGACAAGGGATGGG-1	7767	3655	GA20W_d20	d20	Cortex	Week_20	scRNA_5end_R2_only	Human_Neuron	1.49202	4	4	IN
GA20W_d20_CATGACACACGACGAA-1	24501	6854	GA20W_d20	d20	Cortex	Week_20	scRNA_5end_R2_only	Human_Neuron	2.17205	13	13	Oligo
GA20W_d20_CATGACACAGCTATTG-1	12142	4273	GA20W_d20	d20	Cortex	Week_20	scRNA_5end_R2_only	Human_Neuron	2.1216	5	5	IN_Precursor
GA20W_d20_CATGACACAGTACACT-1	10932	4285	GA20W_d20	d20	Cortex	Week_20	scRNA_5end_R2_only	Human_Neuron	1.90263	4	4	IN
GA20W_d20_CATGACACAGTGGAGT-1	5348	2755	GA20W_d20	d20	Cortex	Week_20	scRNA_5end_R2_only	Human_Neuron	1.97906	2	2	IN
GA20W_d20_CATGACACAGTTAACC-1	3727	2274	GA20W_d20	d20	Cortex	Week_20	scRNA_5end_R2_only	Human_Neuron	1.77122	4	4	IN
GA20W_d20_CATGACAGTGATGATA-1	6031	3136	GA20W_d20	d20	Cortex	Week_20	scRNA_5end_R2_only	Human_Neuron	1.34249	2	2	IN
GA20W_d20_CATGACATCAGCACAT-1	10517	4211	GA20W_d20	d20	Cortex	Week_20	scRNA_5end_R2_only	Human_Neuron	0.407008	0	0	EN
GA20W_d20_CATGACATCTCAACTT-1	3197	1983	GA20W_d20	d20	Cortex	Week_20	scRNA_5end_R2_only	Human_Neuron	0.353982	4	4	IN
GA20W_d20_CATGCCTAGATGTGTA-1	12938	4869	GA20W_d20	d20	Cortex	Week_20	scRNA_5end_R2_only	Human_Neuron	2.21827	9	9	RG
GA20W_d20_CATGCCTAGCGATATA-1	4773	2630	GA20W_d20	d20	Cortex	Week_20	scRNA_5end_R2_only	Human_Neuron	2.35578	4	4	IN
GA20W_d20_CATGCCTAGTGTTAGA-1	2777	1945	GA20W_d20	d20	Cortex	Week_20	scRNA_5end_R2_only	Human_Neuron	4.21339	17	17	IN
GA20W_d20_CATGCCTCACCGGAAA-1	11577	4362	GA20W_d20	d20	Cortex	Week_20	scRNA_5end_R2_only	Human_Neuron	1.74856	5	5	IN_Precursor
GA20W_d20_CATGCCTCAGTAACGG-1	8462	3580	GA20W_d20	d20	Cortex	Week_20	scRNA_5end_R2_only	Human_Neuron	2.75635	10	10	IN
GA20W_d20_CATGCCTCATCGACGC-1	6839	3262	GA20W_d20	d20	Cortex	Week_20	scRNA_5end_R2_only	Human_Neuron	2.40564	17	17	IN
GA20W_d20_CATGCCTGTAGAGGAA-1	19057	5926	GA20W_d20	d20	Cortex	Week_20	scRNA_5end_R2_only	Human_Neuron	3.03017	9	9	RG
GA20W_d20_CATGCCTGTGACAAAT-1	2951	1612	GA20W_d20	d20	Cortex	Week_20	scRNA_5end_R2_only	Human_Neuron	2.68684	9	9	RG
GA20W_d20_CATGCCTGTTCACCTC-1	741	573	GA20W_d20	d20	Cortex	Week_20	scRNA_5end_R2_only	Human_Neuron	5.31646	6	6	IN
GA20W_d20_CATGCCTTCCGCGGTA-1	9057	3954	GA20W_d20	d20	Cortex	Week_20	scRNA_5end_R2_only	Human_Neuron	0.419394	0	0	EN
GA20W_d20_CATGGCGAGAAACCGC-1	1547	1112	GA20W_d20	d20	Cortex	Week_20	scRNA_5end_R2_only	Human_Neuron	6.51791	15	15	Astro
GA20W_d20_CATGGCGAGATCGGGT-1	2286	1565	GA20W_d20	d20	Cortex	Week_20	scRNA_5end_R2_only	Human_Neuron	0.248036	1	1	EN
GA20W_d20_CATGGCGAGCACGCCT-1	976	751	GA20W_d20	d20	Cortex	Week_20	scRNA_5end_R2_only	Human_Neuron	16.33	12	12	EN
GA20W_d20_CATGGCGAGCGTTTAC-1	18818	5489	GA20W_d20	d20	Cortex	Week_20	scRNA_5end_R2_only	Human_Neuron	1.40683	5	5	IN_Precursor
GA20W_d20_CATGGCGAGTACATGA-1	12515	4361	GA20W_d20	d20	Cortex	Week_20	scRNA_5end_R2_only	Human_Neuron	2.55524	8	8	IN_Precursor
GA20W_d20_CATGGCGAGTAGGTGC-1	5922	2756	GA20W_d20	d20	Cortex	Week_20	scRNA_5end_R2_only	Human_Neuron	2.05909	4	4	IN
GA20W_d20_CATGGCGCAATAGCGG-1	6616	3209	GA20W_d20	d20	Cortex	Week_20	scRNA_5end_R2_only	Human_Neuron	2.53981	3	3	EOMES+ IPC
GA20W_d20_CATGGCGCATGTAGTC-1	4153	2434	GA20W_d20	d20	Cortex	Week_20	scRNA_5end_R2_only	Human_Neuron	2.7907	17	17	IN
GA20W_d20_CATGGCGCATTGGTAC-1	11800	4221	GA20W_d20	d20	Cortex	Week_20	scRNA_5end_R2_only	Human_Neuron	1.64227	8	8	IN_Precursor
GA20W_d20_CATGGCGGTCATTAGC-1	6758	3287	GA20W_d20	d20	Cortex	Week_20	scRNA_5end_R2_only	Human_Neuron	1.28916	3	3	EOMES+ IPC
GA20W_d20_CATGGCGTCCTATGTT-1	5562	2611	GA20W_d20	d20	Cortex	Week_20	scRNA_5end_R2_only	Human_Neuron	2.44208	2	2	IN
GA20W_d20_CATGGCGTCTCCTATA-1	3952	2300	GA20W_d20	d20	Cortex	Week_20	scRNA_5end_R2_only	Human_Neuron	1.04724	1	1	EN
GA20W_d20_CATGGCGTCTTGTCAT-1	10889	4105	GA20W_d20	d20	Cortex	Week_20	scRNA_5end_R2_only	Human_Neuron	3.01784	8	8	IN_Precursor
GA20W_d20_CATTATCAGATCGGGT-1	5000	2758	GA20W_d20	d20	Cortex	Week_20	scRNA_5end_R2_only	Human_Neuron	3.09785	0	0	EN
GA20W_d20_CATTATCAGCTAAACA-1	14117	4757	GA20W_d20	d20	Cortex	Week_20	scRNA_5end_R2_only	Human_Neuron	1.4542	7	7	ASCL1+ IPC
GA20W_d20_CATTATCAGGCGTACA-1	7012	2986	GA20W_d20	d20	Cortex	Week_20	scRNA_5end_R2_only	Human_Neuron	1.06435	2	2	IN
GA20W_d20_CATTATCAGTGAACGC-1	7274	3059	GA20W_d20	d20	Cortex	Week_20	scRNA_5end_R2_only	Human_Neuron	0.963201	8	8	IN_Precursor
GA20W_d20_CATTATCCAACGATCT-1	11164	4490	GA20W_d20	d20	Cortex	Week_20	scRNA_5end_R2_only	Human_Neuron	6.53774	4	4	IN
GA20W_d20_CATTATCCAGCCACCA-1	10753	4443	GA20W_d20	d20	Cortex	Week_20	scRNA_5end_R2_only	Human_Neuron	0.232787	11	11	EN
GA20W_d20_CATTATCGTCGTTGTA-1	5966	2939	GA20W_d20	d20	Cortex	Week_20	scRNA_5end_R2_only	Human_Neuron	0.158428	11	11	EN
GA20W_d20_CATTATCTCGTAGGAG-1	8418	3503	GA20W_d20	d20	Cortex	Week_20	scRNA_5end_R2_only	Human_Neuron	1.81609	4	4	IN
GA20W_d20_CATTATCTCTATCCTA-1	12858	4868	GA20W_d20	d20	Cortex	Week_20	scRNA_5end_R2_only	Human_Neuron	3.05061	0	0	EN
GA20W_d20_CATTCGCCACTGTTAG-1	7160	3314	GA20W_d20	d20	Cortex	Week_20	scRNA_5end_R2_only	Human_Neuron	1.62169	2	2	IN
GA20W_d20_CATTCGCCAGGCAGTA-1	6368	2879	GA20W_d20	d20	Cortex	Week_20	scRNA_5end_R2_only	Human_Neuron	1.55637	2	2	IN
GA20W_d20_CATTCGCCATGCAACT-1	665	569	GA20W_d20	d20	Cortex	Week_20	scRNA_5end_R2_only	Human_Neuron	0.296736	15	15	Astro
GA20W_d20_CATTCGCGTGGTTTCA-1	3419	2086	GA20W_d20	d20	Cortex	Week_20	scRNA_5end_R2_only	Human_Neuron	0.69241	4	4	IN
GA20W_d20_CATTCGCGTTCACCTC-1	2148	1167	GA20W_d20	d20	Cortex	Week_20	scRNA_5end_R2_only	Human_Neuron	4.06321	16	16	RG
GA20W_d20_CATTCGCTCAGCATGT-1	1127	869	GA20W_d20	d20	Cortex	Week_20	scRNA_5end_R2_only	Human_Neuron	18.169	15	15	Astro
GA20W_d20_CATTCGCTCCTCAATT-1	4604	2278	GA20W_d20	d20	Cortex	Week_20	scRNA_5end_R2_only	Human_Neuron	6.40048	11	11	EN
GA20W_d20_CATTCGCTCTGAAAGA-1	8469	3774	GA20W_d20	d20	Cortex	Week_20	scRNA_5end_R2_only	Human_Neuron	0.807684	0	0	EN
GA20W_d20_CCAATCCAGATAGCAT-1	9657	3707	GA20W_d20	d20	Cortex	Week_20	scRNA_5end_R2_only	Human_Neuron	1.35098	10	10	IN
GA20W_d20_CCAATCCAGCCCAACC-1	1612	1089	GA20W_d20	d20	Cortex	Week_20	scRNA_5end_R2_only	Human_Neuron	4.85948	6	6	IN
GA20W_d20_CCAATCCAGTGACATA-1	34814	7545	GA20W_d20	d20	Cortex	Week_20	scRNA_5end_R2_only	Human_Neuron	1.48019	13	13	Oligo
GA20W_d20_CCAATCCCACTTCTGC-1	4037	2343	GA20W_d20	d20	Cortex	Week_20	scRNA_5end_R2_only	Human_Neuron	0.972411	4	4	IN
GA20W_d20_CCAATCCGTCAATGTC-1	1238	961	GA20W_d20	d20	Cortex	Week_20	scRNA_5end_R2_only	Human_Neuron	2.89963	6	6	IN
GA20W_d20_CCAATCCGTCCGTCAG-1	22509	5822	GA20W_d20	d20	Cortex	Week_20	scRNA_5end_R2_only	Human_Neuron	1.34431	8	8	IN_Precursor
GA20W_d20_CCAATCCGTGTGCGTC-1	7492	3053	GA20W_d20	d20	Cortex	Week_20	scRNA_5end_R2_only	Human_Neuron	1.28415	5	5	IN_Precursor
GA20W_d20_CCAATCCTCACAGTAC-1	5963	3047	GA20W_d20	d20	Cortex	Week_20	scRNA_5end_R2_only	Human_Neuron	5.25154	0	0	EN
GA20W_d20_CCAATCCTCACCCTCA-1	9571	3957	GA20W_d20	d20	Cortex	Week_20	scRNA_5end_R2_only	Human_Neuron	1.55387	10	10	IN
GA20W_d20_CCAATCCTCATGTAGC-1	10510	4221	GA20W_d20	d20	Cortex	Week_20	scRNA_5end_R2_only	Human_Neuron	1.55086	5	5	IN_Precursor
GA20W_d20_CCAATCCTCGACAGCC-1	42393	8567	GA20W_d20	d20	Cortex	Week_20	scRNA_5end_R2_only	Human_Neuron	1.37768	13	13	Oligo
GA20W_d20_CCACCTAAGCCTTGAT-1	13851	4924	GA20W_d20	d20	Cortex	Week_20	scRNA_5end_R2_only	Human_Neuron	1.11018	2	2	IN
GA20W_d20_CCACCTACACGAGGTA-1	9634	3892	GA20W_d20	d20	Cortex	Week_20	scRNA_5end_R2_only	Human_Neuron	2.63255	10	10	IN
GA20W_d20_CCACCTACAGCCTGTG-1	14251	5183	GA20W_d20	d20	Cortex	Week_20	scRNA_5end_R2_only	Human_Neuron	1.00334	4	4	IN
GA20W_d20_CCACCTAGTTACGCGC-1	9413	3645	GA20W_d20	d20	Cortex	Week_20	scRNA_5end_R2_only	Human_Neuron	1.50951	5	5	IN_Precursor
GA20W_d20_CCACCTAGTTCACGGC-1	11523	4337	GA20W_d20	d20	Cortex	Week_20	scRNA_5end_R2_only	Human_Neuron	1.1146	3	3	EOMES+ IPC
GA20W_d20_CCACCTAGTTGTGGCC-1	3926	2495	GA20W_d20	d20	Cortex	Week_20	scRNA_5end_R2_only	Human_Neuron	0.247341	0	0	EN
GA20W_d20_CCACCTATCAGCACAT-1	1253	960	GA20W_d20	d20	Cortex	Week_20	scRNA_5end_R2_only	Human_Neuron	9.04072	6	6	IN
GA20W_d20_CCACCTATCGCCAGCA-1	10910	4230	GA20W_d20	d20	Cortex	Week_20	scRNA_5end_R2_only	Human_Neuron	1.66294	10	10	IN
GA20W_d20_CCACCTATCTCTAAGG-1	14623	5183	GA20W_d20	d20	Cortex	Week_20	scRNA_5end_R2_only	Human_Neuron	2.05773	2	2	IN
GA20W_d20_CCACGGAAGATGCGAC-1	11198	3962	GA20W_d20	d20	Cortex	Week_20	scRNA_5end_R2_only	Human_Neuron	1.32635	9	9	RG
GA20W_d20_CCACGGACAAGGGTCA-1	10536	4612	GA20W_d20	d20	Cortex	Week_20	scRNA_5end_R2_only	Human_Neuron	0.468115	9	9	RG
GA20W_d20_CCACGGACAATGAAAC-1	7164	3123	GA20W_d20	d20	Cortex	Week_20	scRNA_5end_R2_only	Human_Neuron	2.42011	2	2	IN
GA20W_d20_CCACGGACACATGACT-1	7360	3330	GA20W_d20	d20	Cortex	Week_20	scRNA_5end_R2_only	Human_Neuron	2.86021	10	10	IN
GA20W_d20_CCACGGAGTAGGACAC-1	9574	4093	GA20W_d20	d20	Cortex	Week_20	scRNA_5end_R2_only	Human_Neuron	4.06135	9	9	RG
GA20W_d20_CCACGGAGTATCGCAT-1	17226	5500	GA20W_d20	d20	Cortex	Week_20	scRNA_5end_R2_only	Human_Neuron	1.17761	13	13	Oligo
GA20W_d20_CCACGGAGTCAGAATA-1	31126	7272	GA20W_d20	d20	Cortex	Week_20	scRNA_5end_R2_only	Human_Neuron	1.46081	9	9	RG
GA20W_d20_CCACGGAGTGGTCCGT-1	1390	1072	GA20W_d20	d20	Cortex	Week_20	scRNA_5end_R2_only	Human_Neuron	4.25963	4	4	IN
GA20W_d20_CCACGGATCCAAGTAC-1	1548	1165	GA20W_d20	d20	Cortex	Week_20	scRNA_5end_R2_only	Human_Neuron	4.34018	1	1	EN
GA20W_d20_CCACGGATCTCTGCTG-1	11988	4469	GA20W_d20	d20	Cortex	Week_20	scRNA_5end_R2_only	Human_Neuron	1.28868	2	2	IN
GA20W_d20_CCACTACAGAGTAATC-1	4784	2616	GA20W_d20	d20	Cortex	Week_20	scRNA_5end_R2_only	Human_Neuron	1.93682	4	4	IN
GA20W_d20_CCACTACAGCTACCTA-1	6886	3263	GA20W_d20	d20	Cortex	Week_20	scRNA_5end_R2_only	Human_Neuron	2.3116	3	3	EOMES+ IPC
GA20W_d20_CCACTACAGCTGAACG-1	15370	5158	GA20W_d20	d20	Cortex	Week_20	scRNA_5end_R2_only	Human_Neuron	1.38905	11	11	EN
GA20W_d20_CCACTACCACAGACAG-1	9609	3915	GA20W_d20	d20	Cortex	Week_20	scRNA_5end_R2_only	Human_Neuron	2.1978	2	2	IN
GA20W_d20_CCACTACCACGGTAGA-1	11999	4880	GA20W_d20	d20	Cortex	Week_20	scRNA_5end_R2_only	Human_Neuron	1.17032	13	13	Oligo
GA20W_d20_CCACTACCATACAGCT-1	5431	2727	GA20W_d20	d20	Cortex	Week_20	scRNA_5end_R2_only	Human_Neuron	3.34694	3	3	EOMES+ IPC
GA20W_d20_CCACTACGTACCATCA-1	4206	2495	GA20W_d20	d20	Cortex	Week_20	scRNA_5end_R2_only	Human_Neuron	1.62303	4	4	IN
GA20W_d20_CCACTACGTAGAGCTG-1	10162	3885	GA20W_d20	d20	Cortex	Week_20	scRNA_5end_R2_only	Human_Neuron	1.88382	10	10	IN
GA20W_d20_CCACTACTCAGCTCTC-1	1134	855	GA20W_d20	d20	Cortex	Week_20	scRNA_5end_R2_only	Human_Neuron	12.182	17	17	IN
GA20W_d20_CCAGCGAAGAGTACCG-1	11928	4684	GA20W_d20	d20	Cortex	Week_20	scRNA_5end_R2_only	Human_Neuron	3.66608	5	5	IN_Precursor
GA20W_d20_CCAGCGAAGATGGCGT-1	9201	3715	GA20W_d20	d20	Cortex	Week_20	scRNA_5end_R2_only	Human_Neuron	2.51681	10	10	IN
GA20W_d20_CCAGCGAAGGTGTGGT-1	1432	1051	GA20W_d20	d20	Cortex	Week_20	scRNA_5end_R2_only	Human_Neuron	0.204499	4	4	IN
GA20W_d20_CCAGCGAAGTGGGTTG-1	6203	2963	GA20W_d20	d20	Cortex	Week_20	scRNA_5end_R2_only	Human_Neuron	1.44129	2	2	IN
GA20W_d20_CCAGCGAAGTTTGCGT-1	3070	1774	GA20W_d20	d20	Cortex	Week_20	scRNA_5end_R2_only	Human_Neuron	3.88051	2	2	IN
GA20W_d20_CCAGCGACAATCCGAT-1	12015	4696	GA20W_d20	d20	Cortex	Week_20	scRNA_5end_R2_only	Human_Neuron	0.236569	18	18	EN
GA20W_d20_CCAGCGACACGAGGTA-1	8467	3704	GA20W_d20	d20	Cortex	Week_20	scRNA_5end_R2_only	Human_Neuron	2.77081	4	4	IN
GA20W_d20_CCAGCGACATACTCTT-1	8659	3882	GA20W_d20	d20	Cortex	Week_20	scRNA_5end_R2_only	Human_Neuron	1.78718	4	4	IN
GA20W_d20_CCAGCGAGTAAGTGTA-1	4024	2303	GA20W_d20	d20	Cortex	Week_20	scRNA_5end_R2_only	Human_Neuron	1.35788	2	2	IN
GA20W_d20_CCAGCGAGTAGCGCAA-1	4496	2718	GA20W_d20	d20	Cortex	Week_20	scRNA_5end_R2_only	Human_Neuron	9.33679	7	7	ASCL1+ IPC
GA20W_d20_CCAGCGAGTGACAAAT-1	4937	2671	GA20W_d20	d20	Cortex	Week_20	scRNA_5end_R2_only	Human_Neuron	2.48071	1	1	EN
GA20W_d20_CCATGTCAGTCTTGCA-1	6900	3201	GA20W_d20	d20	Cortex	Week_20	scRNA_5end_R2_only	Human_Neuron	1.53826	4	4	IN
GA20W_d20_CCATGTCCAAGGACTG-1	6285	2849	GA20W_d20	d20	Cortex	Week_20	scRNA_5end_R2_only	Human_Neuron	2.76288	2	2	IN
GA20W_d20_CCATGTCCAGGTCCAC-1	7582	3538	GA20W_d20	d20	Cortex	Week_20	scRNA_5end_R2_only	Human_Neuron	2.69107	3	3	EOMES+ IPC
GA20W_d20_CCATGTCCATGAACCT-1	6146	3146	GA20W_d20	d20	Cortex	Week_20	scRNA_5end_R2_only	Human_Neuron	1.89637	1	1	EN
GA20W_d20_CCATGTCGTACTCTCC-1	700	575	GA20W_d20	d20	Cortex	Week_20	scRNA_5end_R2_only	Human_Neuron	5.57769	15	15	Astro
GA20W_d20_CCATGTCGTATATGAG-1	20041	5857	GA20W_d20	d20	Cortex	Week_20	scRNA_5end_R2_only	Human_Neuron	2.11208	5	5	IN_Precursor
GA20W_d20_CCATGTCGTTGTGGAG-1	9152	3925	GA20W_d20	d20	Cortex	Week_20	scRNA_5end_R2_only	Human_Neuron	1.20028	2	2	IN
GA20W_d20_CCATTCGAGCAAATCA-1	3297	1797	GA20W_d20	d20	Cortex	Week_20	scRNA_5end_R2_only	Human_Neuron	0.933553	8	8	IN_Precursor
GA20W_d20_CCATTCGAGCTAGGCA-1	18205	5402	GA20W_d20	d20	Cortex	Week_20	scRNA_5end_R2_only	Human_Neuron	1.75507	8	8	IN_Precursor
GA20W_d20_CCATTCGAGTGTTAGA-1	6472	3422	GA20W_d20	d20	Cortex	Week_20	scRNA_5end_R2_only	Human_Neuron	0.491504	9	9	RG
GA20W_d20_CCATTCGCAACTGCGC-1	16186	4733	GA20W_d20	d20	Cortex	Week_20	scRNA_5end_R2_only	Human_Neuron	1.92905	8	8	IN_Precursor
GA20W_d20_CCATTCGCACGAAAGC-1	8816	3730	GA20W_d20	d20	Cortex	Week_20	scRNA_5end_R2_only	Human_Neuron	1.06061	5	5	IN_Precursor
GA20W_d20_CCATTCGCATTTCAGG-1	7077	3299	GA20W_d20	d20	Cortex	Week_20	scRNA_5end_R2_only	Human_Neuron	1.02279	4	4	IN
GA20W_d20_CCATTCGGTCCGCTGA-1	2816	1569	GA20W_d20	d20	Cortex	Week_20	scRNA_5end_R2_only	Human_Neuron	13.5684	14	14	Astro
GA20W_d20_CCATTCGTCAGTCCCT-1	10767	4265	GA20W_d20	d20	Cortex	Week_20	scRNA_5end_R2_only	Human_Neuron	1.49279	5	5	IN_Precursor
GA20W_d20_CCCAATCAGAGAACAG-1	3783	2181	GA20W_d20	d20	Cortex	Week_20	scRNA_5end_R2_only	Human_Neuron	0.479501	4	4	IN
GA20W_d20_CCCAATCAGAGCAATT-1	7586	3433	GA20W_d20	d20	Cortex	Week_20	scRNA_5end_R2_only	Human_Neuron	4.4126	7	7	ASCL1+ IPC
GA20W_d20_CCCAATCCATCACCCT-1	12175	4419	GA20W_d20	d20	Cortex	Week_20	scRNA_5end_R2_only	Human_Neuron	1.13382	10	10	IN
GA20W_d20_CCCAATCGTCATATGC-1	15778	5545	GA20W_d20	d20	Cortex	Week_20	scRNA_5end_R2_only	Human_Neuron	4.69627	7	7	ASCL1+ IPC
GA20W_d20_CCCAATCGTGCACCAC-1	27422	6907	GA20W_d20	d20	Cortex	Week_20	scRNA_5end_R2_only	Human_Neuron	1.39937	13	13	Oligo
GA20W_d20_CCCAATCGTTCAGTAC-1	15938	5260	GA20W_d20	d20	Cortex	Week_20	scRNA_5end_R2_only	Human_Neuron	2.21986	8	8	IN_Precursor
GA20W_d20_CCCAATCTCCATGCTC-1	826	611	GA20W_d20	d20	Cortex	Week_20	scRNA_5end_R2_only	Human_Neuron	11.3326	6	6	IN
GA20W_d20_CCCAATCTCGCAGGCT-1	7810	3375	GA20W_d20	d20	Cortex	Week_20	scRNA_5end_R2_only	Human_Neuron	1.27778	3	3	EOMES+ IPC
GA20W_d20_CCCAATCTCTCTGCTG-1	13869	4686	GA20W_d20	d20	Cortex	Week_20	scRNA_5end_R2_only	Human_Neuron	0.482135	5	5	IN_Precursor
GA20W_d20_CCCAGTTAGATGTTAG-1	6124	2787	GA20W_d20	d20	Cortex	Week_20	scRNA_5end_R2_only	Human_Neuron	2.5243	10	10	IN
GA20W_d20_CCCAGTTAGCAGGTCA-1	1032	748	GA20W_d20	d20	Cortex	Week_20	scRNA_5end_R2_only	Human_Neuron	6.80394	6	6	IN
GA20W_d20_CCCAGTTAGTCAATAG-1	1036	837	GA20W_d20	d20	Cortex	Week_20	scRNA_5end_R2_only	Human_Neuron	3.06122	12	12	EN
GA20W_d20_CCCAGTTCAAGCGCTC-1	8073	3446	GA20W_d20	d20	Cortex	Week_20	scRNA_5end_R2_only	Human_Neuron	1.425	2	2	IN
GA20W_d20_CCCAGTTCAGTTCCCT-1	23930	6499	GA20W_d20	d20	Cortex	Week_20	scRNA_5end_R2_only	Human_Neuron	1.5161	4	4	IN
GA20W_d20_CCCAGTTGTCGCTTCT-1	9417	4140	GA20W_d20	d20	Cortex	Week_20	scRNA_5end_R2_only	Human_Neuron	0.98912	0	0	EN
GA20W_d20_CCCAGTTGTGTCAATC-1	10508	4336	GA20W_d20	d20	Cortex	Week_20	scRNA_5end_R2_only	Human_Neuron	4.05914	11	11	EN
GA20W_d20_CCCAGTTTCAAGAAGT-1	9807	4048	GA20W_d20	d20	Cortex	Week_20	scRNA_5end_R2_only	Human_Neuron	3.12827	7	7	ASCL1+ IPC
GA20W_d20_CCCAGTTTCCTGTAGA-1	482	393	GA20W_d20	d20	Cortex	Week_20	scRNA_5end_R2_only	Human_Neuron	12.0504	6	6	IN
GA20W_d20_CCCAGTTTCTACTCAT-1	10490	4406	GA20W_d20	d20	Cortex	Week_20	scRNA_5end_R2_only	Human_Neuron	4.60429	8	8	IN_Precursor
GA20W_d20_CCCATACAGCCACGCT-1	5931	2668	GA20W_d20	d20	Cortex	Week_20	scRNA_5end_R2_only	Human_Neuron	0.921513	9	9	RG
GA20W_d20_CCCATACCAATGCCAT-1	1276	908	GA20W_d20	d20	Cortex	Week_20	scRNA_5end_R2_only	Human_Neuron	10.5757	8	8	IN_Precursor
GA20W_d20_CCCATACGTCCCTTGT-1	517	416	GA20W_d20	d20	Cortex	Week_20	scRNA_5end_R2_only	Human_Neuron	0.191939	6	6	IN
GA20W_d20_CCCATACGTGTGGCTC-1	438	375	GA20W_d20	d20	Cortex	Week_20	scRNA_5end_R2_only	Human_Neuron	16.5746	6	6	IN
GA20W_d20_CCCATACGTTATTCTC-1	3645	1979	GA20W_d20	d20	Cortex	Week_20	scRNA_5end_R2_only	Human_Neuron	3.06689	5	5	IN_Precursor
GA20W_d20_CCCATACTCGTCCAGG-1	5508	2539	GA20W_d20	d20	Cortex	Week_20	scRNA_5end_R2_only	Human_Neuron	1.45974	5	5	IN_Precursor
GA20W_d20_CCCATACTCTTCTGGC-1	15943	5096	GA20W_d20	d20	Cortex	Week_20	scRNA_5end_R2_only	Human_Neuron	2.0778	7	7	ASCL1+ IPC
GA20W_d20_CCCTCCTAGAGATGAG-1	34376	8232	GA20W_d20	d20	Cortex	Week_20	scRNA_5end_R2_only	Human_Neuron	2.08994	11	11	EN
GA20W_d20_CCCTCCTAGCGTAGTG-1	2648	1671	GA20W_d20	d20	Cortex	Week_20	scRNA_5end_R2_only	Human_Neuron	0.243309	4	4	IN
GA20W_d20_CCCTCCTAGTAGTGCG-1	33531	7485	GA20W_d20	d20	Cortex	Week_20	scRNA_5end_R2_only	Human_Neuron	1.22687	11	11	EN
GA20W_d20_CCCTCCTAGTTAACGA-1	2480	1725	GA20W_d20	d20	Cortex	Week_20	scRNA_5end_R2_only	Human_Neuron	5.73463	12	12	EN
GA20W_d20_CCCTCCTCATAAAGGT-1	26018	6893	GA20W_d20	d20	Cortex	Week_20	scRNA_5end_R2_only	Human_Neuron	1.36724	8	8	IN_Precursor
GA20W_d20_CCCTCCTGTCTAACGT-1	12564	4773	GA20W_d20	d20	Cortex	Week_20	scRNA_5end_R2_only	Human_Neuron	1.1266	2	2	IN
GA20W_d20_CCCTCCTGTGTTGAGG-1	2192	1356	GA20W_d20	d20	Cortex	Week_20	scRNA_5end_R2_only	Human_Neuron	14.1915	14	14	Astro
GA20W_d20_CCCTCCTTCCAATGGT-1	1335	948	GA20W_d20	d20	Cortex	Week_20	scRNA_5end_R2_only	Human_Neuron	3.92297	6	6	IN
GA20W_d20_CCCTCCTTCCAGAAGG-1	5393	2577	GA20W_d20	d20	Cortex	Week_20	scRNA_5end_R2_only	Human_Neuron	1.7061	2	2	IN
GA20W_d20_CCCTCCTTCCGCATCT-1	10162	4228	GA20W_d20	d20	Cortex	Week_20	scRNA_5end_R2_only	Human_Neuron	1.56431	9	9	RG
GA20W_d20_CCCTCCTTCGCAGGCT-1	15461	5016	GA20W_d20	d20	Cortex	Week_20	scRNA_5end_R2_only	Human_Neuron	1.27959	7	7	ASCL1+ IPC
GA20W_d20_CCCTCCTTCTTCGAGA-1	754	596	GA20W_d20	d20	Cortex	Week_20	scRNA_5end_R2_only	Human_Neuron	6.72269	6	6	IN
GA20W_d20_CCGGGATAGAACAACT-1	3205	2044	GA20W_d20	d20	Cortex	Week_20	scRNA_5end_R2_only	Human_Neuron	3.55457	4	4	IN
GA20W_d20_CCGGGATCAATACGCT-1	6341	2926	GA20W_d20	d20	Cortex	Week_20	scRNA_5end_R2_only	Human_Neuron	1.51348	2	2	IN
GA20W_d20_CCGGGATCACTCTGTC-1	6182	2785	GA20W_d20	d20	Cortex	Week_20	scRNA_5end_R2_only	Human_Neuron	2.01877	2	2	IN
GA20W_d20_CCGGGATCATGCGCAC-1	9425	3794	GA20W_d20	d20	Cortex	Week_20	scRNA_5end_R2_only	Human_Neuron	1.82686	3	3	EOMES+ IPC
GA20W_d20_CCGGGATCATGGTAGG-1	5255	2808	GA20W_d20	d20	Cortex	Week_20	scRNA_5end_R2_only	Human_Neuron	1.86014	4	4	IN
GA20W_d20_CCGGGATGTAGCGATG-1	14130	4860	GA20W_d20	d20	Cortex	Week_20	scRNA_5end_R2_only	Human_Neuron	2.55019	10	10	IN
GA20W_d20_CCGGGATGTATATGAG-1	4213	2453	GA20W_d20	d20	Cortex	Week_20	scRNA_5end_R2_only	Human_Neuron	0.690423	4	4	IN
GA20W_d20_CCGGGATGTCCGCTGA-1	35265	7666	GA20W_d20	d20	Cortex	Week_20	scRNA_5end_R2_only	Human_Neuron	1.27783	13	13	Oligo
GA20W_d20_CCGGGATGTGGTAACG-1	5899	2807	GA20W_d20	d20	Cortex	Week_20	scRNA_5end_R2_only	Human_Neuron	2.63389	2	2	IN
GA20W_d20_CCGGGATGTGTAACGG-1	7702	3552	GA20W_d20	d20	Cortex	Week_20	scRNA_5end_R2_only	Human_Neuron	5.34302	2	2	IN
GA20W_d20_CCGGGATGTTACGACT-1	1057	804	GA20W_d20	d20	Cortex	Week_20	scRNA_5end_R2_only	Human_Neuron	3.19052	6	6	IN
GA20W_d20_CCGGGATGTTGGACCC-1	5716	2495	GA20W_d20	d20	Cortex	Week_20	scRNA_5end_R2_only	Human_Neuron	1.44971	10	10	IN
GA20W_d20_CCGGGATTCCACTCCA-1	15980	5696	GA20W_d20	d20	Cortex	Week_20	scRNA_5end_R2_only	Human_Neuron	2.05627	7	7	ASCL1+ IPC
GA20W_d20_CCGGGATTCCAGTATG-1	3297	2022	GA20W_d20	d20	Cortex	Week_20	scRNA_5end_R2_only	Human_Neuron	0.774122	4	4	IN
GA20W_d20_CCGGGATTCGGAGGTA-1	8046	3609	GA20W_d20	d20	Cortex	Week_20	scRNA_5end_R2_only	Human_Neuron	1.68113	2	2	IN
GA20W_d20_CCGGTAGAGTCACGCC-1	7211	3013	GA20W_d20	d20	Cortex	Week_20	scRNA_5end_R2_only	Human_Neuron	1.08628	8	8	IN_Precursor
GA20W_d20_CCGGTAGCAATGTAAG-1	5841	3005	GA20W_d20	d20	Cortex	Week_20	scRNA_5end_R2_only	Human_Neuron	1.70464	4	4	IN
GA20W_d20_CCGGTAGCATCCTAGA-1	5147	2777	GA20W_d20	d20	Cortex	Week_20	scRNA_5end_R2_only	Human_Neuron	2.67162	2	2	IN
GA20W_d20_CCGGTAGCATGCTAGT-1	25155	6360	GA20W_d20	d20	Cortex	Week_20	scRNA_5end_R2_only	Human_Neuron	1.93613	8	8	IN_Precursor
GA20W_d20_CCGGTAGGTAGCGTGA-1	10632	4359	GA20W_d20	d20	Cortex	Week_20	scRNA_5end_R2_only	Human_Neuron	1.48611	13	13	Oligo
GA20W_d20_CCGGTAGGTATTCTCT-1	4072	2396	GA20W_d20	d20	Cortex	Week_20	scRNA_5end_R2_only	Human_Neuron	0.0233046	2	2	IN
GA20W_d20_CCGGTAGGTCATACTG-1	8980	4137	GA20W_d20	d20	Cortex	Week_20	scRNA_5end_R2_only	Human_Neuron	0.247704	4	4	IN
GA20W_d20_CCGGTAGGTCTAGCGC-1	2112	1448	GA20W_d20	d20	Cortex	Week_20	scRNA_5end_R2_only	Human_Neuron	0.22553	2	2	IN
GA20W_d20_CCGGTAGTCCGTTGCT-1	31502	7117	GA20W_d20	d20	Cortex	Week_20	scRNA_5end_R2_only	Human_Neuron	0.656364	11	11	EN
GA20W_d20_CCGGTAGTCGCATGAT-1	6898	3033	GA20W_d20	d20	Cortex	Week_20	scRNA_5end_R2_only	Human_Neuron	1.79942	2	2	IN
GA20W_d20_CCGGTAGTCGCCAGCA-1	13002	4763	GA20W_d20	d20	Cortex	Week_20	scRNA_5end_R2_only	Human_Neuron	1.78326	2	2	IN
GA20W_d20_CCGGTAGTCTTAACCT-1	6769	3271	GA20W_d20	d20	Cortex	Week_20	scRNA_5end_R2_only	Human_Neuron	3.59352	1	1	EN
GA20W_d20_CCGTACTAGACTACAA-1	9629	4253	GA20W_d20	d20	Cortex	Week_20	scRNA_5end_R2_only	Human_Neuron	2.76361	10	10	IN
GA20W_d20_CCGTACTAGCCGATTT-1	4651	2419	GA20W_d20	d20	Cortex	Week_20	scRNA_5end_R2_only	Human_Neuron	7.33606	11	11	EN
GA20W_d20_CCGTACTAGCGTCTAT-1	8078	3882	GA20W_d20	d20	Cortex	Week_20	scRNA_5end_R2_only	Human_Neuron	0.131046	1	1	EN
GA20W_d20_CCGTACTAGGCTAGAC-1	7921	3703	GA20W_d20	d20	Cortex	Week_20	scRNA_5end_R2_only	Human_Neuron	2.02183	1	1	EN
GA20W_d20_CCGTACTAGTACATGA-1	18963	5711	GA20W_d20	d20	Cortex	Week_20	scRNA_5end_R2_only	Human_Neuron	2.23125	9	9	RG
GA20W_d20_CCGTACTAGTTGAGAT-1	8923	3849	GA20W_d20	d20	Cortex	Week_20	scRNA_5end_R2_only	Human_Neuron	1.27651	1	1	EN
GA20W_d20_CCGTACTCAGACAAAT-1	12050	4503	GA20W_d20	d20	Cortex	Week_20	scRNA_5end_R2_only	Human_Neuron	1.32875	2	2	IN
GA20W_d20_CCGTACTGTAAACCTC-1	20100	5885	GA20W_d20	d20	Cortex	Week_20	scRNA_5end_R2_only	Human_Neuron	1.24412	8	8	IN_Precursor
GA20W_d20_CCGTACTGTTACCGAT-1	6616	3151	GA20W_d20	d20	Cortex	Week_20	scRNA_5end_R2_only	Human_Neuron	2.61551	2	2	IN
GA20W_d20_CCGTACTTCACAAACC-1	15777	4851	GA20W_d20	d20	Cortex	Week_20	scRNA_5end_R2_only	Human_Neuron	2.02317	5	5	IN_Precursor
GA20W_d20_CCGTACTTCATCGATG-1	10107	3669	GA20W_d20	d20	Cortex	Week_20	scRNA_5end_R2_only	Human_Neuron	1.20897	5	5	IN_Precursor
GA20W_d20_CCGTACTTCGTAGGTT-1	3075	1892	GA20W_d20	d20	Cortex	Week_20	scRNA_5end_R2_only	Human_Neuron	2.43902	4	4	IN
GA20W_d20_CCGTGGAAGAAAGTGG-1	11547	4156	GA20W_d20	d20	Cortex	Week_20	scRNA_5end_R2_only	Human_Neuron	2.35432	5	5	IN_Precursor
GA20W_d20_CCGTGGAAGCCACGCT-1	8457	3947	GA20W_d20	d20	Cortex	Week_20	scRNA_5end_R2_only	Human_Neuron	0.203321	0	0	EN
GA20W_d20_CCGTGGAAGCTGAACG-1	2437	1568	GA20W_d20	d20	Cortex	Week_20	scRNA_5end_R2_only	Human_Neuron	2.87938	4	4	IN
GA20W_d20_CCGTGGAAGTCCGGTC-1	3249	1978	GA20W_d20	d20	Cortex	Week_20	scRNA_5end_R2_only	Human_Neuron	2.66777	2	2	IN
GA20W_d20_CCGTGGAAGTCGTACT-1	9153	3583	GA20W_d20	d20	Cortex	Week_20	scRNA_5end_R2_only	Human_Neuron	1.66796	8	8	IN_Precursor
GA20W_d20_CCGTGGAAGTGCCAGA-1	5968	3082	GA20W_d20	d20	Cortex	Week_20	scRNA_5end_R2_only	Human_Neuron	1.91438	13	13	Oligo
GA20W_d20_CCGTGGACACAAGTAA-1	18965	5681	GA20W_d20	d20	Cortex	Week_20	scRNA_5end_R2_only	Human_Neuron	1.25879	11	11	EN
GA20W_d20_CCGTGGACATCTGGTA-1	20901	6184	GA20W_d20	d20	Cortex	Week_20	scRNA_5end_R2_only	Human_Neuron	1.65911	7	7	ASCL1+ IPC
GA20W_d20_CCGTGGAGTCGTTGTA-1	5596	2542	GA20W_d20	d20	Cortex	Week_20	scRNA_5end_R2_only	Human_Neuron	3.44275	5	5	IN_Precursor
GA20W_d20_CCGTGGAGTCTCCACT-1	5586	2676	GA20W_d20	d20	Cortex	Week_20	scRNA_5end_R2_only	Human_Neuron	1.62678	2	2	IN
GA20W_d20_CCGTGGAGTGTATGGG-1	1861	1316	GA20W_d20	d20	Cortex	Week_20	scRNA_5end_R2_only	Human_Neuron	7.4718	6	6	IN
GA20W_d20_CCGTGGATCGTACCGG-1	2535	1798	GA20W_d20	d20	Cortex	Week_20	scRNA_5end_R2_only	Human_Neuron	8.41389	17	17	IN
GA20W_d20_CCGTTCAAGAAAGTGG-1	20035	5530	GA20W_d20	d20	Cortex	Week_20	scRNA_5end_R2_only	Human_Neuron	0.92496	8	8	IN_Precursor
GA20W_d20_CCGTTCACACCCAGTG-1	6666	3157	GA20W_d20	d20	Cortex	Week_20	scRNA_5end_R2_only	Human_Neuron	1.24791	13	13	Oligo
GA20W_d20_CCGTTCACATAGACTC-1	19205	5833	GA20W_d20	d20	Cortex	Week_20	scRNA_5end_R2_only	Human_Neuron	2.62304	7	7	ASCL1+ IPC
GA20W_d20_CCGTTCACATGACATC-1	1775	1268	GA20W_d20	d20	Cortex	Week_20	scRNA_5end_R2_only	Human_Neuron	14.0723	15	15	Astro
GA20W_d20_CCGTTCACATTGGGCC-1	1231	933	GA20W_d20	d20	Cortex	Week_20	scRNA_5end_R2_only	Human_Neuron	11.4812	15	15	Astro
GA20W_d20_CCGTTCACATTTCACT-1	15474	5087	GA20W_d20	d20	Cortex	Week_20	scRNA_5end_R2_only	Human_Neuron	1.48466	5	5	IN_Precursor
GA20W_d20_CCGTTCAGTACCGCTG-1	5090	2774	GA20W_d20	d20	Cortex	Week_20	scRNA_5end_R2_only	Human_Neuron	1.07357	2	2	IN
GA20W_d20_CCGTTCAGTATTCGTG-1	6143	2873	GA20W_d20	d20	Cortex	Week_20	scRNA_5end_R2_only	Human_Neuron	2.23589	2	2	IN
GA20W_d20_CCGTTCAGTCGAGTTT-1	11241	4219	GA20W_d20	d20	Cortex	Week_20	scRNA_5end_R2_only	Human_Neuron	3.14595	2	2	IN
GA20W_d20_CCGTTCAGTCTCATCC-1	7491	3398	GA20W_d20	d20	Cortex	Week_20	scRNA_5end_R2_only	Human_Neuron	1.55817	2	2	IN
GA20W_d20_CCGTTCAGTCTTCTCG-1	2062	1279	GA20W_d20	d20	Cortex	Week_20	scRNA_5end_R2_only	Human_Neuron	0.0893256	16	16	RG
GA20W_d20_CCGTTCATCGCATGAT-1	6682	3334	GA20W_d20	d20	Cortex	Week_20	scRNA_5end_R2_only	Human_Neuron	0.835044	1	1	EN
GA20W_d20_CCGTTCATCTTCCTTC-1	8981	3981	GA20W_d20	d20	Cortex	Week_20	scRNA_5end_R2_only	Human_Neuron	2.67123	2	2	IN
GA20W_d20_CCTAAAGAGAGTACAT-1	2691	1813	GA20W_d20	d20	Cortex	Week_20	scRNA_5end_R2_only	Human_Neuron	0.848033	4	4	IN
GA20W_d20_CCTAAAGCAGATCGGA-1	11428	4269	GA20W_d20	d20	Cortex	Week_20	scRNA_5end_R2_only	Human_Neuron	0.963453	10	10	IN
GA20W_d20_CCTAAAGCAGGACCCT-1	712	534	GA20W_d20	d20	Cortex	Week_20	scRNA_5end_R2_only	Human_Neuron	8.96465	6	6	IN
GA20W_d20_CCTAAAGGTTCCAACA-1	19818	6007	GA20W_d20	d20	Cortex	Week_20	scRNA_5end_R2_only	Human_Neuron	1.54198	7	7	ASCL1+ IPC
GA20W_d20_CCTAAAGTCACAACGT-1	2945	1852	GA20W_d20	d20	Cortex	Week_20	scRNA_5end_R2_only	Human_Neuron	0.469043	4	4	IN
GA20W_d20_CCTAAAGTCGTGACAT-1	7012	3139	GA20W_d20	d20	Cortex	Week_20	scRNA_5end_R2_only	Human_Neuron	1.71941	5	5	IN_Precursor
GA20W_d20_CCTACACAGATCTGCT-1	1600	1093	GA20W_d20	d20	Cortex	Week_20	scRNA_5end_R2_only	Human_Neuron	16.39	15	15	Astro
GA20W_d20_CCTACACAGCTAAACA-1	7524	3531	GA20W_d20	d20	Cortex	Week_20	scRNA_5end_R2_only	Human_Neuron	2.36848	2	2	IN
GA20W_d20_CCTACACAGGGCTCTC-1	494	418	GA20W_d20	d20	Cortex	Week_20	scRNA_5end_R2_only	Human_Neuron	15.4237	6	6	IN
GA20W_d20_CCTACACAGTACGCCC-1	9441	4091	GA20W_d20	d20	Cortex	Week_20	scRNA_5end_R2_only	Human_Neuron	0.347533	17	17	IN
GA20W_d20_CCTACACCAAGCTGGA-1	5729	2778	GA20W_d20	d20	Cortex	Week_20	scRNA_5end_R2_only	Human_Neuron	2.33121	2	2	IN
GA20W_d20_CCTACACCAGATGGCA-1	12165	4562	GA20W_d20	d20	Cortex	Week_20	scRNA_5end_R2_only	Human_Neuron	2.38441	10	10	IN
GA20W_d20_CCTACACCAGCCTTTC-1	10203	4130	GA20W_d20	d20	Cortex	Week_20	scRNA_5end_R2_only	Human_Neuron	1.85054	5	5	IN_Precursor
GA20W_d20_CCTACACCATAGGATA-1	6509	3065	GA20W_d20	d20	Cortex	Week_20	scRNA_5end_R2_only	Human_Neuron	1.51009	2	2	IN
GA20W_d20_CCTACACGTGACTCAT-1	20251	5986	GA20W_d20	d20	Cortex	Week_20	scRNA_5end_R2_only	Human_Neuron	0.934622	8	8	IN_Precursor
GA20W_d20_CCTACACGTGGTACAG-1	9538	3763	GA20W_d20	d20	Cortex	Week_20	scRNA_5end_R2_only	Human_Neuron	1.48846	2	2	IN
GA20W_d20_CCTACCAAGCTGAAAT-1	13399	4851	GA20W_d20	d20	Cortex	Week_20	scRNA_5end_R2_only	Human_Neuron	2.4594	7	7	ASCL1+ IPC
GA20W_d20_CCTACCAAGCTGTTCA-1	1200	920	GA20W_d20	d20	Cortex	Week_20	scRNA_5end_R2_only	Human_Neuron	17.4237	15	15	Astro
GA20W_d20_CCTACCAAGGACAGAA-1	12046	4622	GA20W_d20	d20	Cortex	Week_20	scRNA_5end_R2_only	Human_Neuron	1.59325	3	3	EOMES+ IPC
GA20W_d20_CCTACCAAGGATGCGT-1	5185	2777	GA20W_d20	d20	Cortex	Week_20	scRNA_5end_R2_only	Human_Neuron	3.30719	2	2	IN
GA20W_d20_CCTACCACAAACTGTC-1	22642	6373	GA20W_d20	d20	Cortex	Week_20	scRNA_5end_R2_only	Human_Neuron	3.05562	11	11	EN
GA20W_d20_CCTACCACACATAACC-1	4022	2380	GA20W_d20	d20	Cortex	Week_20	scRNA_5end_R2_only	Human_Neuron	0.501825	4	4	IN
GA20W_d20_CCTACCACACATGGGA-1	12432	4669	GA20W_d20	d20	Cortex	Week_20	scRNA_5end_R2_only	Human_Neuron	1.98333	2	2	IN
GA20W_d20_CCTACCACATTGTGCA-1	2128	1445	GA20W_d20	d20	Cortex	Week_20	scRNA_5end_R2_only	Human_Neuron	0.178571	4	4	IN
GA20W_d20_CCTACCAGTAGAGGAA-1	9669	4239	GA20W_d20	d20	Cortex	Week_20	scRNA_5end_R2_only	Human_Neuron	1.40129	13	13	Oligo
GA20W_d20_CCTACCAGTCCGAAGA-1	14286	5236	GA20W_d20	d20	Cortex	Week_20	scRNA_5end_R2_only	Human_Neuron	3.00561	7	7	ASCL1+ IPC
GA20W_d20_CCTACCATCCACGTGG-1	9085	3842	GA20W_d20	d20	Cortex	Week_20	scRNA_5end_R2_only	Human_Neuron	1.23128	2	2	IN
GA20W_d20_CCTACCATCCTTAATC-1	1387	1010	GA20W_d20	d20	Cortex	Week_20	scRNA_5end_R2_only	Human_Neuron	0.684932	17	17	IN
GA20W_d20_CCTACCATCGTTTAGG-1	16804	5487	GA20W_d20	d20	Cortex	Week_20	scRNA_5end_R2_only	Human_Neuron	2.22498	7	7	ASCL1+ IPC
GA20W_d20_CCTACCATCTGACCTC-1	7156	3370	GA20W_d20	d20	Cortex	Week_20	scRNA_5end_R2_only	Human_Neuron	2.12888	3	3	EOMES+ IPC
GA20W_d20_CCTACCATCTGCCCTA-1	8236	3664	GA20W_d20	d20	Cortex	Week_20	scRNA_5end_R2_only	Human_Neuron	1.89	10	10	IN
GA20W_d20_CCTAGCTAGATAGCAT-1	8544	3651	GA20W_d20	d20	Cortex	Week_20	scRNA_5end_R2_only	Human_Neuron	0.922099	10	10	IN
GA20W_d20_CCTAGCTAGCGGATCA-1	8496	3726	GA20W_d20	d20	Cortex	Week_20	scRNA_5end_R2_only	Human_Neuron	2.13799	9	9	RG
GA20W_d20_CCTAGCTAGGCTCAGA-1	9559	3974	GA20W_d20	d20	Cortex	Week_20	scRNA_5end_R2_only	Human_Neuron	2.73359	10	10	IN
GA20W_d20_CCTAGCTGTACGACCC-1	21330	6039	GA20W_d20	d20	Cortex	Week_20	scRNA_5end_R2_only	Human_Neuron	1.9415	7	7	ASCL1+ IPC
GA20W_d20_CCTAGCTGTCTGCGGT-1	3760	2324	GA20W_d20	d20	Cortex	Week_20	scRNA_5end_R2_only	Human_Neuron	0.931286	1	1	EN
GA20W_d20_CCTAGCTGTCTTTCAT-1	12461	4585	GA20W_d20	d20	Cortex	Week_20	scRNA_5end_R2_only	Human_Neuron	2.52835	10	10	IN
GA20W_d20_CCTAGCTTCCTAGAAC-1	14586	5058	GA20W_d20	d20	Cortex	Week_20	scRNA_5end_R2_only	Human_Neuron	2.81168	9	9	RG
GA20W_d20_CCTAGCTTCTTATCTG-1	14900	5236	GA20W_d20	d20	Cortex	Week_20	scRNA_5end_R2_only	Human_Neuron	2.31151	7	7	ASCL1+ IPC
GA20W_d20_CCTATTACAGCTCCGA-1	19879	6238	GA20W_d20	d20	Cortex	Week_20	scRNA_5end_R2_only	Human_Neuron	2.86083	7	7	ASCL1+ IPC
GA20W_d20_CCTATTAGTATTCTCT-1	7232	3255	GA20W_d20	d20	Cortex	Week_20	scRNA_5end_R2_only	Human_Neuron	1.91035	10	10	IN
GA20W_d20_CCTATTAGTCTCTCTG-1	7336	3387	GA20W_d20	d20	Cortex	Week_20	scRNA_5end_R2_only	Human_Neuron	0.894608	2	2	IN
GA20W_d20_CCTATTAGTGACGCCT-1	13123	4926	GA20W_d20	d20	Cortex	Week_20	scRNA_5end_R2_only	Human_Neuron	1.875	5	5	IN_Precursor
GA20W_d20_CCTATTAGTGCAGGTA-1	4548	2610	GA20W_d20	d20	Cortex	Week_20	scRNA_5end_R2_only	Human_Neuron	2.51984	4	4	IN
GA20W_d20_CCTATTATCAAGGCTT-1	4811	2566	GA20W_d20	d20	Cortex	Week_20	scRNA_5end_R2_only	Human_Neuron	2.30203	3	3	EOMES+ IPC
GA20W_d20_CCTATTATCGTTGACA-1	10181	4323	GA20W_d20	d20	Cortex	Week_20	scRNA_5end_R2_only	Human_Neuron	0.905667	18	18	EN
GA20W_d20_CCTATTATCGTTTAGG-1	3500	2072	GA20W_d20	d20	Cortex	Week_20	scRNA_5end_R2_only	Human_Neuron	1.30039	1	1	EN
GA20W_d20_CCTATTATCTTCGGTC-1	10181	4150	GA20W_d20	d20	Cortex	Week_20	scRNA_5end_R2_only	Human_Neuron	2.97258	2	2	IN
GA20W_d20_CCTCAGTAGAGTACCG-1	5993	3080	GA20W_d20	d20	Cortex	Week_20	scRNA_5end_R2_only	Human_Neuron	3.75679	18	18	EN
GA20W_d20_CCTCAGTAGATCCTGT-1	12753	4817	GA20W_d20	d20	Cortex	Week_20	scRNA_5end_R2_only	Human_Neuron	1.59382	5	5	IN_Precursor
GA20W_d20_CCTCAGTAGCAGACTG-1	4446	2424	GA20W_d20	d20	Cortex	Week_20	scRNA_5end_R2_only	Human_Neuron	1.2366	10	10	IN
GA20W_d20_CCTCAGTAGGGAAACA-1	9221	3724	GA20W_d20	d20	Cortex	Week_20	scRNA_5end_R2_only	Human_Neuron	1.4425	8	8	IN_Precursor
GA20W_d20_CCTCAGTGTCGCATAT-1	617	487	GA20W_d20	d20	Cortex	Week_20	scRNA_5end_R2_only	Human_Neuron	13.4535	6	6	IN
GA20W_d20_CCTCAGTGTTCGTCTC-1	8326	4004	GA20W_d20	d20	Cortex	Week_20	scRNA_5end_R2_only	Human_Neuron	1.74031	18	18	EN
GA20W_d20_CCTCAGTTCAACGGCC-1	7557	3696	GA20W_d20	d20	Cortex	Week_20	scRNA_5end_R2_only	Human_Neuron	3.69161	0	0	EN
GA20W_d20_CCTCAGTTCATCATTC-1	1037	758	GA20W_d20	d20	Cortex	Week_20	scRNA_5end_R2_only	Human_Neuron	13.0864	6	6	IN
GA20W_d20_CCTCAGTTCTTAGAGC-1	613	497	GA20W_d20	d20	Cortex	Week_20	scRNA_5end_R2_only	Human_Neuron	18.4555	6	6	IN
GA20W_d20_CCTCTGAAGCCACGTC-1	6654	2981	GA20W_d20	d20	Cortex	Week_20	scRNA_5end_R2_only	Human_Neuron	1.63128	3	3	EOMES+ IPC
GA20W_d20_CCTCTGAAGCCCAATT-1	15934	5571	GA20W_d20	d20	Cortex	Week_20	scRNA_5end_R2_only	Human_Neuron	2.28736	7	7	ASCL1+ IPC
GA20W_d20_CCTCTGAAGTATCGAA-1	8102	3344	GA20W_d20	d20	Cortex	Week_20	scRNA_5end_R2_only	Human_Neuron	2.53368	4	4	IN
GA20W_d20_CCTCTGACAGCGTCCA-1	12554	4633	GA20W_d20	d20	Cortex	Week_20	scRNA_5end_R2_only	Human_Neuron	1.28478	10	10	IN
GA20W_d20_CCTCTGACAGCTGTAT-1	13961	4367	GA20W_d20	d20	Cortex	Week_20	scRNA_5end_R2_only	Human_Neuron	1.89063	8	8	IN_Precursor
GA20W_d20_CCTCTGACAGTACACT-1	5737	2885	GA20W_d20	d20	Cortex	Week_20	scRNA_5end_R2_only	Human_Neuron	3.89068	3	3	EOMES+ IPC
GA20W_d20_CCTCTGAGTCACTGGC-1	14671	5268	GA20W_d20	d20	Cortex	Week_20	scRNA_5end_R2_only	Human_Neuron	2.07576	18	18	EN
GA20W_d20_CCTCTGAGTGGCGAAT-1	17326	5786	GA20W_d20	d20	Cortex	Week_20	scRNA_5end_R2_only	Human_Neuron	1.35207	0	0	EN
GA20W_d20_CCTCTGATCGCAGGCT-1	6295	2995	GA20W_d20	d20	Cortex	Week_20	scRNA_5end_R2_only	Human_Neuron	1.81845	4	4	IN
GA20W_d20_CCTTACGAGAGCTGCA-1	5531	3159	GA20W_d20	d20	Cortex	Week_20	scRNA_5end_R2_only	Human_Neuron	7.29012	14	14	Astro
GA20W_d20_CCTTACGAGAGGTAGA-1	5993	3050	GA20W_d20	d20	Cortex	Week_20	scRNA_5end_R2_only	Human_Neuron	3.35654	0	0	EN
GA20W_d20_CCTTACGAGATCCTGT-1	994	764	GA20W_d20	d20	Cortex	Week_20	scRNA_5end_R2_only	Human_Neuron	0.885827	6	6	IN
GA20W_d20_CCTTACGAGCTGATAA-1	8648	3843	GA20W_d20	d20	Cortex	Week_20	scRNA_5end_R2_only	Human_Neuron	2.05465	4	4	IN
GA20W_d20_CCTTACGAGGCAGTCA-1	1213	914	GA20W_d20	d20	Cortex	Week_20	scRNA_5end_R2_only	Human_Neuron	5.83776	10	10	IN
GA20W_d20_CCTTACGAGGTGCTTT-1	4455	2508	GA20W_d20	d20	Cortex	Week_20	scRNA_5end_R2_only	Human_Neuron	1.66093	4	4	IN
GA20W_d20_CCTTACGAGGTTCCTA-1	975	782	GA20W_d20	d20	Cortex	Week_20	scRNA_5end_R2_only	Human_Neuron	5.05145	6	6	IN
GA20W_d20_CCTTACGAGTATCTCG-1	9270	3889	GA20W_d20	d20	Cortex	Week_20	scRNA_5end_R2_only	Human_Neuron	1.38606	2	2	IN
GA20W_d20_CCTTACGAGTTCCACA-1	15653	5457	GA20W_d20	d20	Cortex	Week_20	scRNA_5end_R2_only	Human_Neuron	4.27961	11	11	EN
GA20W_d20_CCTTACGCAATAGCGG-1	23207	6424	GA20W_d20	d20	Cortex	Week_20	scRNA_5end_R2_only	Human_Neuron	1.17112	9	9	RG
GA20W_d20_CCTTACGCAATCGGTT-1	3962	2305	GA20W_d20	d20	Cortex	Week_20	scRNA_5end_R2_only	Human_Neuron	1.18147	4	4	IN
GA20W_d20_CCTTACGGTCGCCATG-1	8473	3559	GA20W_d20	d20	Cortex	Week_20	scRNA_5end_R2_only	Human_Neuron	2.52495	3	3	EOMES+ IPC
GA20W_d20_CCTTACGGTCTCCACT-1	7579	3412	GA20W_d20	d20	Cortex	Week_20	scRNA_5end_R2_only	Human_Neuron	1.05505	13	13	Oligo
GA20W_d20_CCTTACGGTGCAGTAG-1	2142	1378	GA20W_d20	d20	Cortex	Week_20	scRNA_5end_R2_only	Human_Neuron	11.417	14	14	Astro
GA20W_d20_CCTTACGGTGTTGGGA-1	28950	6952	GA20W_d20	d20	Cortex	Week_20	scRNA_5end_R2_only	Human_Neuron	1.51036	13	13	Oligo
GA20W_d20_CCTTACGGTTAGAACA-1	12435	4715	GA20W_d20	d20	Cortex	Week_20	scRNA_5end_R2_only	Human_Neuron	1.48271	2	2	IN
GA20W_d20_CCTTACGGTTCATGGT-1	9697	4025	GA20W_d20	d20	Cortex	Week_20	scRNA_5end_R2_only	Human_Neuron	1.96474	2	2	IN
GA20W_d20_CCTTACGTCCAAGTAC-1	9069	3680	GA20W_d20	d20	Cortex	Week_20	scRNA_5end_R2_only	Human_Neuron	1.80491	10	10	IN
GA20W_d20_CCTTCCCAGAGCTGCA-1	5874	2866	GA20W_d20	d20	Cortex	Week_20	scRNA_5end_R2_only	Human_Neuron	1.16732	2	2	IN
GA20W_d20_CCTTCCCAGCGATATA-1	5496	2617	GA20W_d20	d20	Cortex	Week_20	scRNA_5end_R2_only	Human_Neuron	1.58983	2	2	IN
GA20W_d20_CCTTCCCAGGGCACTA-1	2967	1954	GA20W_d20	d20	Cortex	Week_20	scRNA_5end_R2_only	Human_Neuron	0.246457	4	4	IN
GA20W_d20_CCTTCCCCAGTCTTCC-1	11045	4425	GA20W_d20	d20	Cortex	Week_20	scRNA_5end_R2_only	Human_Neuron	1.80013	4	4	IN
GA20W_d20_CCTTCCCGTGAAAGAG-1	588	488	GA20W_d20	d20	Cortex	Week_20	scRNA_5end_R2_only	Human_Neuron	7.68049	6	6	IN
GA20W_d20_CCTTCCCTCATCTGCC-1	9312	4159	GA20W_d20	d20	Cortex	Week_20	scRNA_5end_R2_only	Human_Neuron	1.01941	13	13	Oligo
GA20W_d20_CCTTCCCTCCACGAAT-1	4484	2493	GA20W_d20	d20	Cortex	Week_20	scRNA_5end_R2_only	Human_Neuron	0.287356	1	1	EN
GA20W_d20_CCTTCGAAGACCACGA-1	685	528	GA20W_d20	d20	Cortex	Week_20	scRNA_5end_R2_only	Human_Neuron	4.14993	1	1	EN
GA20W_d20_CCTTCGAAGACTAGGC-1	23595	6620	GA20W_d20	d20	Cortex	Week_20	scRNA_5end_R2_only	Human_Neuron	1.14772	17	17	IN
GA20W_d20_CCTTCGAAGATGCGAC-1	11689	4373	GA20W_d20	d20	Cortex	Week_20	scRNA_5end_R2_only	Human_Neuron	0.607698	2	2	IN
GA20W_d20_CCTTCGAAGCAAATCA-1	880	664	GA20W_d20	d20	Cortex	Week_20	scRNA_5end_R2_only	Human_Neuron	8.5567	6	6	IN
GA20W_d20_CCTTCGAAGCCTTGAT-1	6974	3177	GA20W_d20	d20	Cortex	Week_20	scRNA_5end_R2_only	Human_Neuron	0.187718	8	8	IN_Precursor
GA20W_d20_CCTTCGAAGCGATAGC-1	6612	3233	GA20W_d20	d20	Cortex	Week_20	scRNA_5end_R2_only	Human_Neuron	0.31339	1	1	EN
GA20W_d20_CCTTCGACAAGAAAGG-1	935	708	GA20W_d20	d20	Cortex	Week_20	scRNA_5end_R2_only	Human_Neuron	10.6942	6	6	IN
GA20W_d20_CCTTCGACAGCTCGCA-1	3534	2049	GA20W_d20	d20	Cortex	Week_20	scRNA_5end_R2_only	Human_Neuron	9.82075	15	15	Astro
GA20W_d20_CCTTCGACATTCCTCG-1	21287	6298	GA20W_d20	d20	Cortex	Week_20	scRNA_5end_R2_only	Human_Neuron	1.48354	8	8	IN_Precursor
GA20W_d20_CCTTCGAGTCTCCATC-1	8893	3794	GA20W_d20	d20	Cortex	Week_20	scRNA_5end_R2_only	Human_Neuron	0.795269	4	4	IN
GA20W_d20_CCTTCGAGTGCAACGA-1	27546	6977	GA20W_d20	d20	Cortex	Week_20	scRNA_5end_R2_only	Human_Neuron	1.51142	7	7	ASCL1+ IPC
GA20W_d20_CCTTCGATCAACCATG-1	2928	1910	GA20W_d20	d20	Cortex	Week_20	scRNA_5end_R2_only	Human_Neuron	0.698856	4	4	IN
GA20W_d20_CCTTCGATCCTTAATC-1	8495	3687	GA20W_d20	d20	Cortex	Week_20	scRNA_5end_R2_only	Human_Neuron	1.94165	2	2	IN
GA20W_d20_CCTTCGATCGTAGGAG-1	2521	1679	GA20W_d20	d20	Cortex	Week_20	scRNA_5end_R2_only	Human_Neuron	0.515085	2	2	IN
GA20W_d20_CCTTCGATCTACCTGC-1	8062	3861	GA20W_d20	d20	Cortex	Week_20	scRNA_5end_R2_only	Human_Neuron	3.67738	0	0	EN
GA20W_d20_CCTTCGATCTATCCCG-1	6908	3310	GA20W_d20	d20	Cortex	Week_20	scRNA_5end_R2_only	Human_Neuron	1.43541	4	4	IN
GA20W_d20_CCTTTCTAGAACAACT-1	6874	3272	GA20W_d20	d20	Cortex	Week_20	scRNA_5end_R2_only	Human_Neuron	2.06837	3	3	EOMES+ IPC
GA20W_d20_CCTTTCTAGCCTCGTG-1	9469	3800	GA20W_d20	d20	Cortex	Week_20	scRNA_5end_R2_only	Human_Neuron	1.46573	5	5	IN_Precursor
GA20W_d20_CCTTTCTAGCTAAGAT-1	4469	2541	GA20W_d20	d20	Cortex	Week_20	scRNA_5end_R2_only	Human_Neuron	1.71627	0	0	EN
GA20W_d20_CCTTTCTAGGTAAACT-1	3741	2112	GA20W_d20	d20	Cortex	Week_20	scRNA_5end_R2_only	Human_Neuron	1.5269	10	10	IN
GA20W_d20_CCTTTCTCAATAGAGT-1	8321	3836	GA20W_d20	d20	Cortex	Week_20	scRNA_5end_R2_only	Human_Neuron	3.14459	3	3	EOMES+ IPC
GA20W_d20_CCTTTCTCACAGATTC-1	5600	2917	GA20W_d20	d20	Cortex	Week_20	scRNA_5end_R2_only	Human_Neuron	3.53278	2	2	IN
GA20W_d20_CCTTTCTCATGTCCTC-1	9110	3873	GA20W_d20	d20	Cortex	Week_20	scRNA_5end_R2_only	Human_Neuron	1.95194	10	10	IN
GA20W_d20_CCTTTCTGTGGCAAAC-1	11227	4287	GA20W_d20	d20	Cortex	Week_20	scRNA_5end_R2_only	Human_Neuron	1.90918	13	13	Oligo
GA20W_d20_CCTTTCTTCCTGTACC-1	2456	1587	GA20W_d20	d20	Cortex	Week_20	scRNA_5end_R2_only	Human_Neuron	3.24427	4	4	IN
GA20W_d20_CGAACATAGCCACGTC-1	3902	2276	GA20W_d20	d20	Cortex	Week_20	scRNA_5end_R2_only	Human_Neuron	0.456621	0	0	EN
GA20W_d20_CGAACATCAACTTGAC-1	23522	6531	GA20W_d20	d20	Cortex	Week_20	scRNA_5end_R2_only	Human_Neuron	0.775164	2	2	IN
GA20W_d20_CGAACATCAAGCTGTT-1	13842	4622	GA20W_d20	d20	Cortex	Week_20	scRNA_5end_R2_only	Human_Neuron	2.20545	5	5	IN_Precursor
GA20W_d20_CGAACATCACTATCTT-1	1541	1181	GA20W_d20	d20	Cortex	Week_20	scRNA_5end_R2_only	Human_Neuron	11.6846	12	12	EN
GA20W_d20_CGAACATCAGCTGTAT-1	678	560	GA20W_d20	d20	Cortex	Week_20	scRNA_5end_R2_only	Human_Neuron	12.8589	6	6	IN
GA20W_d20_CGAACATCAGGCAGTA-1	13166	4795	GA20W_d20	d20	Cortex	Week_20	scRNA_5end_R2_only	Human_Neuron	1.85797	3	3	EOMES+ IPC
GA20W_d20_CGAACATCATATGCTG-1	7538	3448	GA20W_d20	d20	Cortex	Week_20	scRNA_5end_R2_only	Human_Neuron	0.812121	3	3	EOMES+ IPC
GA20W_d20_CGAACATGTACCATCA-1	12324	4724	GA20W_d20	d20	Cortex	Week_20	scRNA_5end_R2_only	Human_Neuron	0.130238	0	0	EN
GA20W_d20_CGAACATGTCGCCATG-1	958	673	GA20W_d20	d20	Cortex	Week_20	scRNA_5end_R2_only	Human_Neuron	10.392	6	6	IN
GA20W_d20_CGAACATTCAATCTCT-1	12891	4707	GA20W_d20	d20	Cortex	Week_20	scRNA_5end_R2_only	Human_Neuron	0.977545	5	5	IN_Precursor
GA20W_d20_CGAACATTCAGTTAGC-1	13605	4219	GA20W_d20	d20	Cortex	Week_20	scRNA_5end_R2_only	Human_Neuron	2.26969	8	8	IN_Precursor
GA20W_d20_CGAACATTCTGCGACG-1	5051	2546	GA20W_d20	d20	Cortex	Week_20	scRNA_5end_R2_only	Human_Neuron	2.08616	2	2	IN
GA20W_d20_CGAATGTAGACCGGAT-1	12633	4958	GA20W_d20	d20	Cortex	Week_20	scRNA_5end_R2_only	Human_Neuron	1.33514	0	0	EN
GA20W_d20_CGAATGTAGCTCCCAG-1	6477	3300	GA20W_d20	d20	Cortex	Week_20	scRNA_5end_R2_only	Human_Neuron	1.42349	0	0	EN
GA20W_d20_CGAATGTAGGCTAGGT-1	11276	4417	GA20W_d20	d20	Cortex	Week_20	scRNA_5end_R2_only	Human_Neuron	2.86372	13	13	Oligo
GA20W_d20_CGAATGTAGGTGCTTT-1	6559	3127	GA20W_d20	d20	Cortex	Week_20	scRNA_5end_R2_only	Human_Neuron	1.52174	4	4	IN
GA20W_d20_CGAATGTAGTGGGTTG-1	18186	5231	GA20W_d20	d20	Cortex	Week_20	scRNA_5end_R2_only	Human_Neuron	0.71066	8	8	IN_Precursor
GA20W_d20_CGAATGTCAAGCCATT-1	7638	3684	GA20W_d20	d20	Cortex	Week_20	scRNA_5end_R2_only	Human_Neuron	1.02906	1	1	EN
GA20W_d20_CGAATGTCACATCCAA-1	2049	1359	GA20W_d20	d20	Cortex	Week_20	scRNA_5end_R2_only	Human_Neuron	3.08411	4	4	IN
GA20W_d20_CGAATGTCACCTTGTC-1	6256	2907	GA20W_d20	d20	Cortex	Week_20	scRNA_5end_R2_only	Human_Neuron	1.95917	2	2	IN
GA20W_d20_CGAATGTCACTACAGT-1	11094	4342	GA20W_d20	d20	Cortex	Week_20	scRNA_5end_R2_only	Human_Neuron	1.85685	2	2	IN
GA20W_d20_CGAATGTCAGATTGCT-1	2499	1681	GA20W_d20	d20	Cortex	Week_20	scRNA_5end_R2_only	Human_Neuron	15.5184	12	12	EN
GA20W_d20_CGAATGTCATAGGATA-1	8203	3391	GA20W_d20	d20	Cortex	Week_20	scRNA_5end_R2_only	Human_Neuron	2.13153	3	3	EOMES+ IPC
GA20W_d20_CGAATGTGTCAGATAA-1	19098	4932	GA20W_d20	d20	Cortex	Week_20	scRNA_5end_R2_only	Human_Neuron	0.939706	8	8	IN_Precursor
GA20W_d20_CGAATGTGTCAGGACA-1	48328	8465	GA20W_d20	d20	Cortex	Week_20	scRNA_5end_R2_only	Human_Neuron	1.33224	8	8	IN_Precursor
GA20W_d20_CGAATGTGTTACGCGC-1	5944	3187	GA20W_d20	d20	Cortex	Week_20	scRNA_5end_R2_only	Human_Neuron	0.294695	0	0	EN
GA20W_d20_CGAATGTGTTCCTCCA-1	4010	2321	GA20W_d20	d20	Cortex	Week_20	scRNA_5end_R2_only	Human_Neuron	0.287839	1	1	EN
GA20W_d20_CGAATGTTCATAAAGG-1	4626	2560	GA20W_d20	d20	Cortex	Week_20	scRNA_5end_R2_only	Human_Neuron	4.79939	3	3	EOMES+ IPC
GA20W_d20_CGAATGTTCCATTCTA-1	20248	5691	GA20W_d20	d20	Cortex	Week_20	scRNA_5end_R2_only	Human_Neuron	2.22391	8	8	IN_Precursor
GA20W_d20_CGAATGTTCCTTTCTC-1	8617	4076	GA20W_d20	d20	Cortex	Week_20	scRNA_5end_R2_only	Human_Neuron	1.62431	0	0	EN
GA20W_d20_CGAATGTTCGAGAGCA-1	4250	2498	GA20W_d20	d20	Cortex	Week_20	scRNA_5end_R2_only	Human_Neuron	3.96437	0	0	EN
GA20W_d20_CGACCTTAGAATGTGT-1	8317	3556	GA20W_d20	d20	Cortex	Week_20	scRNA_5end_R2_only	Human_Neuron	0.951763	4	4	IN
GA20W_d20_CGACCTTCACGGTTTA-1	14770	5034	GA20W_d20	d20	Cortex	Week_20	scRNA_5end_R2_only	Human_Neuron	0.759131	5	5	IN_Precursor
GA20W_d20_CGACCTTGTAGTACCT-1	18916	5605	GA20W_d20	d20	Cortex	Week_20	scRNA_5end_R2_only	Human_Neuron	1.32522	2	2	IN
GA20W_d20_CGACCTTGTTTCGCTC-1	10599	4492	GA20W_d20	d20	Cortex	Week_20	scRNA_5end_R2_only	Human_Neuron	2.99135	7	7	ASCL1+ IPC
GA20W_d20_CGACCTTTCGGATGTT-1	467	360	GA20W_d20	d20	Cortex	Week_20	scRNA_5end_R2_only	Human_Neuron	7.82443	6	6	IN
GA20W_d20_CGACCTTTCTAAGCCA-1	3700	2146	GA20W_d20	d20	Cortex	Week_20	scRNA_5end_R2_only	Human_Neuron	0.34398	4	4	IN
GA20W_d20_CGACTTCAGGCAAAGA-1	15252	4707	GA20W_d20	d20	Cortex	Week_20	scRNA_5end_R2_only	Human_Neuron	1.34344	5	5	IN_Precursor
GA20W_d20_CGACTTCAGTGTACCT-1	13764	4625	GA20W_d20	d20	Cortex	Week_20	scRNA_5end_R2_only	Human_Neuron	2.09279	5	5	IN_Precursor
GA20W_d20_CGACTTCCAAGCCGCT-1	1486	1163	GA20W_d20	d20	Cortex	Week_20	scRNA_5end_R2_only	Human_Neuron	17.6503	12	12	EN
GA20W_d20_CGACTTCCAATCACAC-1	726	575	GA20W_d20	d20	Cortex	Week_20	scRNA_5end_R2_only	Human_Neuron	9.30233	6	6	IN
GA20W_d20_CGACTTCCAGTTTACG-1	951	693	GA20W_d20	d20	Cortex	Week_20	scRNA_5end_R2_only	Human_Neuron	0	6	6	IN
GA20W_d20_CGACTTCGTAACGACG-1	2288	1728	GA20W_d20	d20	Cortex	Week_20	scRNA_5end_R2_only	Human_Neuron	0.0434783	7	7	ASCL1+ IPC
GA20W_d20_CGACTTCGTCATACTG-1	2454	1575	GA20W_d20	d20	Cortex	Week_20	scRNA_5end_R2_only	Human_Neuron	2.68065	4	4	IN
GA20W_d20_CGACTTCGTCGATTGT-1	11408	4088	GA20W_d20	d20	Cortex	Week_20	scRNA_5end_R2_only	Human_Neuron	1.81604	5	5	IN_Precursor
GA20W_d20_CGACTTCGTGTTTGTG-1	11832	4353	GA20W_d20	d20	Cortex	Week_20	scRNA_5end_R2_only	Human_Neuron	1.3256	5	5	IN_Precursor
GA20W_d20_CGACTTCTCACCTCGT-1	8969	3773	GA20W_d20	d20	Cortex	Week_20	scRNA_5end_R2_only	Human_Neuron	1.84929	4	4	IN
GA20W_d20_CGACTTCTCGATAGAA-1	7237	3256	GA20W_d20	d20	Cortex	Week_20	scRNA_5end_R2_only	Human_Neuron	1.97605	4	4	IN
GA20W_d20_CGAGAAGAGAATTCCC-1	1424	1019	GA20W_d20	d20	Cortex	Week_20	scRNA_5end_R2_only	Human_Neuron	0	2	2	IN
GA20W_d20_CGAGAAGAGAGCTTCT-1	796	647	GA20W_d20	d20	Cortex	Week_20	scRNA_5end_R2_only	Human_Neuron	0.837321	6	6	IN
GA20W_d20_CGAGAAGAGAGGGATA-1	9628	4117	GA20W_d20	d20	Cortex	Week_20	scRNA_5end_R2_only	Human_Neuron	3.2296	13	13	Oligo
GA20W_d20_CGAGAAGAGCTCAACT-1	7998	3325	GA20W_d20	d20	Cortex	Week_20	scRNA_5end_R2_only	Human_Neuron	2.42229	10	10	IN
GA20W_d20_CGAGAAGCAGGGAGAG-1	29640	7061	GA20W_d20	d20	Cortex	Week_20	scRNA_5end_R2_only	Human_Neuron	2.19774	13	13	Oligo
GA20W_d20_CGAGAAGGTACAGACG-1	6566	2886	GA20W_d20	d20	Cortex	Week_20	scRNA_5end_R2_only	Human_Neuron	2.72867	2	2	IN
GA20W_d20_CGAGAAGGTGCAGACA-1	6674	3111	GA20W_d20	d20	Cortex	Week_20	scRNA_5end_R2_only	Human_Neuron	1.24448	4	4	IN
GA20W_d20_CGAGAAGGTGGTCTCG-1	9649	3861	GA20W_d20	d20	Cortex	Week_20	scRNA_5end_R2_only	Human_Neuron	1.08143	10	10	IN
GA20W_d20_CGAGAAGGTTGTACAC-1	10411	4072	GA20W_d20	d20	Cortex	Week_20	scRNA_5end_R2_only	Human_Neuron	2.10063	13	13	Oligo
GA20W_d20_CGAGAAGTCCAAGTAC-1	1299	1008	GA20W_d20	d20	Cortex	Week_20	scRNA_5end_R2_only	Human_Neuron	9.21596	6	6	IN
GA20W_d20_CGAGAAGTCCGATATG-1	13289	4852	GA20W_d20	d20	Cortex	Week_20	scRNA_5end_R2_only	Human_Neuron	1.5391	0	0	EN
GA20W_d20_CGAGCACAGAAACGCC-1	13054	5078	GA20W_d20	d20	Cortex	Week_20	scRNA_5end_R2_only	Human_Neuron	3.77742	7	7	ASCL1+ IPC
GA20W_d20_CGAGCACAGCCAGTAG-1	8183	3304	GA20W_d20	d20	Cortex	Week_20	scRNA_5end_R2_only	Human_Neuron	2.20542	10	10	IN
GA20W_d20_CGAGCACCACCGATAT-1	7433	3720	GA20W_d20	d20	Cortex	Week_20	scRNA_5end_R2_only	Human_Neuron	2.70409	14	14	Astro
GA20W_d20_CGAGCACCACGCGAAA-1	2254	1512	GA20W_d20	d20	Cortex	Week_20	scRNA_5end_R2_only	Human_Neuron	1.76302	4	4	IN
GA20W_d20_CGAGCACCACTGTCGG-1	14236	4360	GA20W_d20	d20	Cortex	Week_20	scRNA_5end_R2_only	Human_Neuron	0.907937	8	8	IN_Precursor
GA20W_d20_CGAGCACCATAAGACA-1	5288	2594	GA20W_d20	d20	Cortex	Week_20	scRNA_5end_R2_only	Human_Neuron	1.04381	2	2	IN
GA20W_d20_CGAGCACGTACATCCA-1	12719	4564	GA20W_d20	d20	Cortex	Week_20	scRNA_5end_R2_only	Human_Neuron	2.55333	7	7	ASCL1+ IPC
GA20W_d20_CGAGCACGTGCAACGA-1	1805	1239	GA20W_d20	d20	Cortex	Week_20	scRNA_5end_R2_only	Human_Neuron	8.75734	12	12	EN
GA20W_d20_CGAGCACTCACTTCAT-1	5603	2666	GA20W_d20	d20	Cortex	Week_20	scRNA_5end_R2_only	Human_Neuron	2.5641	2	2	IN
GA20W_d20_CGAGCACTCAGCACAT-1	11060	4050	GA20W_d20	d20	Cortex	Week_20	scRNA_5end_R2_only	Human_Neuron	2.0745	2	2	IN
GA20W_d20_CGAGCCACAATAGCGG-1	2388	1571	GA20W_d20	d20	Cortex	Week_20	scRNA_5end_R2_only	Human_Neuron	4.67543	2	2	IN
GA20W_d20_CGAGCCACAGCCAATT-1	3043	1755	GA20W_d20	d20	Cortex	Week_20	scRNA_5end_R2_only	Human_Neuron	2.90716	4	4	IN
GA20W_d20_CGAGCCAGTGCACCAC-1	15539	5383	GA20W_d20	d20	Cortex	Week_20	scRNA_5end_R2_only	Human_Neuron	2.9243	8	8	IN_Precursor
GA20W_d20_CGAGCCATCAAAGTAG-1	2601	1506	GA20W_d20	d20	Cortex	Week_20	scRNA_5end_R2_only	Human_Neuron	7.08215	14	14	Astro
GA20W_d20_CGAGCCATCGGTGTCG-1	2314	1596	GA20W_d20	d20	Cortex	Week_20	scRNA_5end_R2_only	Human_Neuron	15.9002	14	14	Astro
GA20W_d20_CGATCGGAGCGCTTAT-1	6955	3266	GA20W_d20	d20	Cortex	Week_20	scRNA_5end_R2_only	Human_Neuron	2.62163	9	9	RG
GA20W_d20_CGATCGGCAACGCACC-1	6423	3172	GA20W_d20	d20	Cortex	Week_20	scRNA_5end_R2_only	Human_Neuron	1.59686	3	3	EOMES+ IPC
GA20W_d20_CGATCGGCAATCGGTT-1	5575	2984	GA20W_d20	d20	Cortex	Week_20	scRNA_5end_R2_only	Human_Neuron	0.0846167	0	0	EN
GA20W_d20_CGATCGGGTAGCGATG-1	4870	2643	GA20W_d20	d20	Cortex	Week_20	scRNA_5end_R2_only	Human_Neuron	4.58057	1	1	EN
GA20W_d20_CGATCGGTCAAACCAC-1	1158	741	GA20W_d20	d20	Cortex	Week_20	scRNA_5end_R2_only	Human_Neuron	0.510204	6	6	IN
GA20W_d20_CGATCGGTCGTCTGCT-1	7934	3521	GA20W_d20	d20	Cortex	Week_20	scRNA_5end_R2_only	Human_Neuron	2.09644	10	10	IN
GA20W_d20_CGATCGGTCTTGACGA-1	637	451	GA20W_d20	d20	Cortex	Week_20	scRNA_5end_R2_only	Human_Neuron	7.57143	12	12	EN
GA20W_d20_CGATGGCAGCCGCCTA-1	11199	4468	GA20W_d20	d20	Cortex	Week_20	scRNA_5end_R2_only	Human_Neuron	2.33613	11	11	EN
GA20W_d20_CGATGGCAGCTCCTTC-1	2204	1465	GA20W_d20	d20	Cortex	Week_20	scRNA_5end_R2_only	Human_Neuron	0.132392	2	2	IN
GA20W_d20_CGATGGCAGGCAGTCA-1	12064	4274	GA20W_d20	d20	Cortex	Week_20	scRNA_5end_R2_only	Human_Neuron	1.26919	5	5	IN_Precursor
GA20W_d20_CGATGGCAGGGCTTGA-1	29480	7018	GA20W_d20	d20	Cortex	Week_20	scRNA_5end_R2_only	Human_Neuron	1.24642	8	8	IN_Precursor
GA20W_d20_CGATGGCAGTATGACA-1	11499	4450	GA20W_d20	d20	Cortex	Week_20	scRNA_5end_R2_only	Human_Neuron	1.84428	5	5	IN_Precursor
GA20W_d20_CGATGGCAGTGTTAGA-1	11657	4357	GA20W_d20	d20	Cortex	Week_20	scRNA_5end_R2_only	Human_Neuron	1.57919	5	5	IN_Precursor
GA20W_d20_CGATGGCCAGACAAAT-1	14010	4986	GA20W_d20	d20	Cortex	Week_20	scRNA_5end_R2_only	Human_Neuron	1.20744	5	5	IN_Precursor
GA20W_d20_CGATGGCCATGGTTGT-1	4644	2452	GA20W_d20	d20	Cortex	Week_20	scRNA_5end_R2_only	Human_Neuron	2.57664	2	2	IN
GA20W_d20_CGATGGCGTTGGTTTG-1	513	426	GA20W_d20	d20	Cortex	Week_20	scRNA_5end_R2_only	Human_Neuron	17.0418	6	6	IN
GA20W_d20_CGATGGCTCGCAAGCC-1	7404	3307	GA20W_d20	d20	Cortex	Week_20	scRNA_5end_R2_only	Human_Neuron	2.8149	2	2	IN
GA20W_d20_CGATGGCTCGTATCAG-1	14633	4986	GA20W_d20	d20	Cortex	Week_20	scRNA_5end_R2_only	Human_Neuron	0.651163	9	9	RG
GA20W_d20_CGATGGCTCTGGAGCC-1	10455	4067	GA20W_d20	d20	Cortex	Week_20	scRNA_5end_R2_only	Human_Neuron	1.84461	4	4	IN
GA20W_d20_CGATGTAAGGACTGGT-1	55214	8995	GA20W_d20	d20	Cortex	Week_20	scRNA_5end_R2_only	Human_Neuron	1.31564	13	13	Oligo
GA20W_d20_CGATGTAAGTGTCCCG-1	3374	2007	GA20W_d20	d20	Cortex	Week_20	scRNA_5end_R2_only	Human_Neuron	1.97618	2	2	IN
GA20W_d20_CGATGTACATCCAACA-1	11458	4625	GA20W_d20	d20	Cortex	Week_20	scRNA_5end_R2_only	Human_Neuron	5.48231	7	7	ASCL1+ IPC
GA20W_d20_CGATGTACATGTCCTC-1	10633	4215	GA20W_d20	d20	Cortex	Week_20	scRNA_5end_R2_only	Human_Neuron	3.45324	9	9	RG
GA20W_d20_CGATGTAGTCATGCAT-1	9323	4011	GA20W_d20	d20	Cortex	Week_20	scRNA_5end_R2_only	Human_Neuron	1.88623	0	0	EN
GA20W_d20_CGATGTAGTCTGCCAG-1	9509	4167	GA20W_d20	d20	Cortex	Week_20	scRNA_5end_R2_only	Human_Neuron	0.77187	2	2	IN
GA20W_d20_CGATGTAGTGTAACGG-1	5537	2718	GA20W_d20	d20	Cortex	Week_20	scRNA_5end_R2_only	Human_Neuron	3.58025	2	2	IN
GA20W_d20_CGATGTAGTTAAGAAC-1	14444	5296	GA20W_d20	d20	Cortex	Week_20	scRNA_5end_R2_only	Human_Neuron	2.14272	0	0	EN
GA20W_d20_CGATGTAGTTCAACCA-1	9310	4002	GA20W_d20	d20	Cortex	Week_20	scRNA_5end_R2_only	Human_Neuron	2.73567	3	3	EOMES+ IPC
GA20W_d20_CGATGTATCATCATTC-1	834	638	GA20W_d20	d20	Cortex	Week_20	scRNA_5end_R2_only	Human_Neuron	6.84327	6	6	IN
GA20W_d20_CGATGTATCCGTAGGC-1	14045	4957	GA20W_d20	d20	Cortex	Week_20	scRNA_5end_R2_only	Human_Neuron	2.1169	7	7	ASCL1+ IPC
GA20W_d20_CGATGTATCGGCGGTT-1	7699	3424	GA20W_d20	d20	Cortex	Week_20	scRNA_5end_R2_only	Human_Neuron	1.80838	2	2	IN
GA20W_d20_CGATGTATCGGTTCGG-1	6018	2613	GA20W_d20	d20	Cortex	Week_20	scRNA_5end_R2_only	Human_Neuron	1.32331	8	8	IN_Precursor
GA20W_d20_CGATGTATCTCTAAGG-1	6287	2873	GA20W_d20	d20	Cortex	Week_20	scRNA_5end_R2_only	Human_Neuron	1.69368	8	8	IN_Precursor
GA20W_d20_CGATGTATCTGACCTC-1	1497	1136	GA20W_d20	d20	Cortex	Week_20	scRNA_5end_R2_only	Human_Neuron	4.28227	1	1	EN
GA20W_d20_CGATTGAAGGGCTTGA-1	9288	3890	GA20W_d20	d20	Cortex	Week_20	scRNA_5end_R2_only	Human_Neuron	2.748	5	5	IN_Precursor
GA20W_d20_CGATTGACAGTTAACC-1	17912	5632	GA20W_d20	d20	Cortex	Week_20	scRNA_5end_R2_only	Human_Neuron	2.85983	4	4	IN
GA20W_d20_CGATTGACATGCATGT-1	11944	4414	GA20W_d20	d20	Cortex	Week_20	scRNA_5end_R2_only	Human_Neuron	1.60716	13	13	Oligo
GA20W_d20_CGATTGACATTACCTT-1	8791	3950	GA20W_d20	d20	Cortex	Week_20	scRNA_5end_R2_only	Human_Neuron	4.03012	0	0	EN
GA20W_d20_CGATTGAGTAAGTGTA-1	7742	3805	GA20W_d20	d20	Cortex	Week_20	scRNA_5end_R2_only	Human_Neuron	9.71312	13	13	Oligo
GA20W_d20_CGATTGAGTCTCGTTC-1	956	768	GA20W_d20	d20	Cortex	Week_20	scRNA_5end_R2_only	Human_Neuron	12.9148	12	12	EN
GA20W_d20_CGCCAAGAGCTGCCCA-1	10575	4038	GA20W_d20	d20	Cortex	Week_20	scRNA_5end_R2_only	Human_Neuron	0.472509	5	5	IN_Precursor
GA20W_d20_CGCCAAGAGGCACATG-1	5270	2531	GA20W_d20	d20	Cortex	Week_20	scRNA_5end_R2_only	Human_Neuron	0.600962	2	2	IN
GA20W_d20_CGCCAAGCAAGCCTAT-1	915	673	GA20W_d20	d20	Cortex	Week_20	scRNA_5end_R2_only	Human_Neuron	11.9545	6	6	IN
GA20W_d20_CGCCAAGCAGATAATG-1	8107	3312	GA20W_d20	d20	Cortex	Week_20	scRNA_5end_R2_only	Human_Neuron	3.34259	10	10	IN
GA20W_d20_CGCCAAGCAGCTGCTG-1	6628	3025	GA20W_d20	d20	Cortex	Week_20	scRNA_5end_R2_only	Human_Neuron	3.31527	10	10	IN
GA20W_d20_CGCCAAGGTCGAGATG-1	778	627	GA20W_d20	d20	Cortex	Week_20	scRNA_5end_R2_only	Human_Neuron	5.19324	6	6	IN
GA20W_d20_CGCCAAGTCTAACTGG-1	27049	6841	GA20W_d20	d20	Cortex	Week_20	scRNA_5end_R2_only	Human_Neuron	1.38735	8	8	IN_Precursor
GA20W_d20_CGCGGTAAGAGATGAG-1	2926	1798	GA20W_d20	d20	Cortex	Week_20	scRNA_5end_R2_only	Human_Neuron	2.29372	4	4	IN
GA20W_d20_CGCGGTAAGAGGGATA-1	6500	3261	GA20W_d20	d20	Cortex	Week_20	scRNA_5end_R2_only	Human_Neuron	0.983747	4	4	IN
GA20W_d20_CGCGGTAAGTTGAGTA-1	15405	5416	GA20W_d20	d20	Cortex	Week_20	scRNA_5end_R2_only	Human_Neuron	1.47868	8	8	IN_Precursor
GA20W_d20_CGCGGTACAATGCCAT-1	13767	4850	GA20W_d20	d20	Cortex	Week_20	scRNA_5end_R2_only	Human_Neuron	2.24865	9	9	RG
GA20W_d20_CGCGGTACACCGCTAG-1	2492	1732	GA20W_d20	d20	Cortex	Week_20	scRNA_5end_R2_only	Human_Neuron	0.710339	17	17	IN
GA20W_d20_CGCGGTAGTACTCGCG-1	5792	2736	GA20W_d20	d20	Cortex	Week_20	scRNA_5end_R2_only	Human_Neuron	1.85773	2	2	IN
GA20W_d20_CGCGGTAGTCCTAGCG-1	12814	4563	GA20W_d20	d20	Cortex	Week_20	scRNA_5end_R2_only	Human_Neuron	1.35815	8	8	IN_Precursor
GA20W_d20_CGCGGTAGTCGAGTTT-1	17138	5328	GA20W_d20	d20	Cortex	Week_20	scRNA_5end_R2_only	Human_Neuron	1.80714	9	9	RG
GA20W_d20_CGCGGTATCACTATTC-1	9607	3943	GA20W_d20	d20	Cortex	Week_20	scRNA_5end_R2_only	Human_Neuron	2.41265	10	10	IN
GA20W_d20_CGCGGTATCAGAGGTG-1	7764	3262	GA20W_d20	d20	Cortex	Week_20	scRNA_5end_R2_only	Human_Neuron	2.02393	10	10	IN
GA20W_d20_CGCGTTTAGTAACCCT-1	449	379	GA20W_d20	d20	Cortex	Week_20	scRNA_5end_R2_only	Human_Neuron	18.9142	6	6	IN
GA20W_d20_CGCGTTTAGTCCTCCT-1	1360	945	GA20W_d20	d20	Cortex	Week_20	scRNA_5end_R2_only	Human_Neuron	6.19296	1	1	EN
GA20W_d20_CGCGTTTAGTGACTCT-1	513	407	GA20W_d20	d20	Cortex	Week_20	scRNA_5end_R2_only	Human_Neuron	10.9983	15	15	Astro
GA20W_d20_CGCGTTTGTTGATTCG-1	1182	934	GA20W_d20	d20	Cortex	Week_20	scRNA_5end_R2_only	Human_Neuron	15.5963	12	12	EN
GA20W_d20_CGCGTTTTCAGGCGAA-1	9967	3734	GA20W_d20	d20	Cortex	Week_20	scRNA_5end_R2_only	Human_Neuron	0.322076	5	5	IN_Precursor
GA20W_d20_CGCGTTTTCGCTTAGA-1	12362	4482	GA20W_d20	d20	Cortex	Week_20	scRNA_5end_R2_only	Human_Neuron	1.56238	5	5	IN_Precursor
GA20W_d20_CGCTATCGTTGGTAAA-1	21781	6104	GA20W_d20	d20	Cortex	Week_20	scRNA_5end_R2_only	Human_Neuron	2.96906	7	7	ASCL1+ IPC
GA20W_d20_CGCTATCTCAGGCCCA-1	13210	4621	GA20W_d20	d20	Cortex	Week_20	scRNA_5end_R2_only	Human_Neuron	2.07187	5	5	IN_Precursor
GA20W_d20_CGCTATCTCCGCATAA-1	16465	5584	GA20W_d20	d20	Cortex	Week_20	scRNA_5end_R2_only	Human_Neuron	2.09305	7	7	ASCL1+ IPC
GA20W_d20_CGCTATCTCTCGTTTA-1	18062	5588	GA20W_d20	d20	Cortex	Week_20	scRNA_5end_R2_only	Human_Neuron	2.50808	7	7	ASCL1+ IPC
GA20W_d20_CGCTGGAAGACAAAGG-1	5784	2739	GA20W_d20	d20	Cortex	Week_20	scRNA_5end_R2_only	Human_Neuron	3.22064	4	4	IN
GA20W_d20_CGCTGGACACGGCGTT-1	1375	914	GA20W_d20	d20	Cortex	Week_20	scRNA_5end_R2_only	Human_Neuron	18.8921	6	6	IN
GA20W_d20_CGCTGGACACGGTAGA-1	6495	3172	GA20W_d20	d20	Cortex	Week_20	scRNA_5end_R2_only	Human_Neuron	6.60079	4	4	IN
GA20W_d20_CGCTGGACATATACCG-1	689	541	GA20W_d20	d20	Cortex	Week_20	scRNA_5end_R2_only	Human_Neuron	0.569801	6	6	IN
GA20W_d20_CGCTGGAGTATGCTTG-1	3613	2209	GA20W_d20	d20	Cortex	Week_20	scRNA_5end_R2_only	Human_Neuron	0.726518	2	2	IN
GA20W_d20_CGCTGGAGTCTCTCGT-1	3622	2176	GA20W_d20	d20	Cortex	Week_20	scRNA_5end_R2_only	Human_Neuron	0.819252	4	4	IN
GA20W_d20_CGCTGGAGTTAGATGA-1	14238	5274	GA20W_d20	d20	Cortex	Week_20	scRNA_5end_R2_only	Human_Neuron	0.837532	0	0	EN
GA20W_d20_CGCTGGAGTTCTGGTA-1	14118	5510	GA20W_d20	d20	Cortex	Week_20	scRNA_5end_R2_only	Human_Neuron	1.70315	7	7	ASCL1+ IPC
GA20W_d20_CGCTGGATCATGTCCC-1	1553	1110	GA20W_d20	d20	Cortex	Week_20	scRNA_5end_R2_only	Human_Neuron	0.479904	4	4	IN
GA20W_d20_CGCTGGATCCTAGGGC-1	15530	5094	GA20W_d20	d20	Cortex	Week_20	scRNA_5end_R2_only	Human_Neuron	1.16253	4	4	IN
GA20W_d20_CGCTGGATCGCAAACT-1	5261	2599	GA20W_d20	d20	Cortex	Week_20	scRNA_5end_R2_only	Human_Neuron	0.798138	2	2	IN
GA20W_d20_CGCTGGATCTGATTCT-1	14225	5217	GA20W_d20	d20	Cortex	Week_20	scRNA_5end_R2_only	Human_Neuron	1.93697	10	10	IN
GA20W_d20_CGCTTCAAGTGTCCCG-1	6940	3281	GA20W_d20	d20	Cortex	Week_20	scRNA_5end_R2_only	Human_Neuron	3.54311	5	5	IN_Precursor
GA20W_d20_CGCTTCAAGTGTGGCA-1	9341	3794	GA20W_d20	d20	Cortex	Week_20	scRNA_5end_R2_only	Human_Neuron	1.72364	2	2	IN
GA20W_d20_CGCTTCACACAGATTC-1	5258	2763	GA20W_d20	d20	Cortex	Week_20	scRNA_5end_R2_only	Human_Neuron	2.30618	13	13	Oligo
GA20W_d20_CGCTTCACACCACCAG-1	20942	6046	GA20W_d20	d20	Cortex	Week_20	scRNA_5end_R2_only	Human_Neuron	0.602936	9	9	RG
GA20W_d20_CGCTTCACACTAAGTC-1	6448	3035	GA20W_d20	d20	Cortex	Week_20	scRNA_5end_R2_only	Human_Neuron	1.50324	4	4	IN
GA20W_d20_CGCTTCACAGGGATTG-1	7601	3571	GA20W_d20	d20	Cortex	Week_20	scRNA_5end_R2_only	Human_Neuron	0.347007	0	0	EN
GA20W_d20_CGCTTCACATTCTTAC-1	5464	2908	GA20W_d20	d20	Cortex	Week_20	scRNA_5end_R2_only	Human_Neuron	5.15569	14	14	Astro
GA20W_d20_CGCTTCAGTAGATTAG-1	1660	1223	GA20W_d20	d20	Cortex	Week_20	scRNA_5end_R2_only	Human_Neuron	16.7898	15	15	Astro
GA20W_d20_CGCTTCAGTCCAGTAT-1	1733	1174	GA20W_d20	d20	Cortex	Week_20	scRNA_5end_R2_only	Human_Neuron	8.85685	6	6	IN
GA20W_d20_CGCTTCAGTCGATTGT-1	12254	4827	GA20W_d20	d20	Cortex	Week_20	scRNA_5end_R2_only	Human_Neuron	1.09083	7	7	ASCL1+ IPC
GA20W_d20_CGCTTCAGTCGGATCC-1	6478	2765	GA20W_d20	d20	Cortex	Week_20	scRNA_5end_R2_only	Human_Neuron	0.742268	5	5	IN_Precursor
GA20W_d20_CGCTTCAGTCTGGTCG-1	15968	5306	GA20W_d20	d20	Cortex	Week_20	scRNA_5end_R2_only	Human_Neuron	1.29708	2	2	IN
GA20W_d20_CGCTTCATCAGTTGAC-1	17649	5745	GA20W_d20	d20	Cortex	Week_20	scRNA_5end_R2_only	Human_Neuron	0.568182	2	2	IN
GA20W_d20_CGGACACAGATCCCAT-1	16109	4891	GA20W_d20	d20	Cortex	Week_20	scRNA_5end_R2_only	Human_Neuron	2.72833	4	4	IN
[truncated: 7,787 more rows]
